# Supplementary material for: Reconstruction of a charge balanced genome-scale metabolic model to study the energy-uncoupled growth of Zymomonas mobilis ZM1
Source: Royal Society of Chemistry journal article supplement (doi:10.1039/c5mb00588d), 2016-02-01
Supplement: c5mb00588d1.xlsx [file c5mb00588d1.xlsx]

## Sheet: reactions
Rxn name	Rxn description	Formula	Gene-Protein-Reaction Association	Gene-Reaction Association	Protein	Subsystem	Reversible	LB	UB	Objective	ConfidenceScore	E.C. number	References
HEX1	hexokinase (D-glucose:ATP)	atp[c] + glc-D[c] -> adp[c] + g6p[c] + h[c]	Glk (Zmob_0910)	Zmob_0910	glucokinase	Glycolysis/Gluconeogenesis	0	0	1000	0		2.7.1.2	KEGG
PGI	glucose-6-phosphate isomerase	g6p[c] <=> f6p[c]	Pgi (Zmob_0122)	Zmob_0122	glucose-6-phosphate isomerase	Glycolysis/Gluconeogenesis	1	-1000	1000	0		5.3.1.9	KEGG
PGMT	phosphoglucomutase	g1p[c] <=> g6p[c]			phosphoglucomutase	Glycolysis/Gluconeogenesis	1	-1000	1000	0		5.4.2.2	KEGG
FBP	fructose-bisphosphatase	fdp[c] + h2o[c] -> f6p[c] + pi[c]	Fbp (Zmob_1009)	Zmob_1009	fructose-1,6-bisphosphatase	Glycolysis/Gluconeogenesis	0	0	1000	0		3.1.3.11	KEGG
FBA	fructose-bisphosphate aldolase	fdp[c] <=> dhap[c] + g3p[c]	ALDO (Zmob_0659)	Zmob_0659	fructose-bisphosphate aldolase	Glycolysis/Gluconeogenesis	1	-1000	1000	0		4.1.2.13	KEGG
TPI	D-glyceraldehyde-3-phosphate aldose-ketose-isomerase	dhap[c] <=> g3p[c]	Tpi (Zmob_0994)	Zmob_0994	triosephosphate isomerase	Glycolysis/Gluconeogenesis	1	-1000	1000	0		5.3.1.1	KEGG
GAPD	D-glyceraldehyde-3-phosphate:NAD+ oxidoreductase (phosphorylating)	g3p[c] + nad[c] + pi[c] <=> 13dpg[c] + h[c] + nadh[c]	GapA (Zmob_0661)	Zmob_0661	glyceraldehyde-3-phosphate dehydrogenase	Glycolysis/Gluconeogenesis	1	-1000	1000	0		1.2.1.12	KEGG
PGK	3-phospho-D-glycerate 1-phosphotransferase	3pg[c] + atp[c] <=> 13dpg[c] + adp[c]	Pgk (Zmob_0660)	Zmob_0660	phosphoglycerate kinase	Glycolysis/Gluconeogenesis	1	-1000	1000	0		2.7.2.3	KEGG
PGM	D-phosphoglycerate 2,3-phosphomutase	2pg[c] <=> 3pg[c]	GpmA (Zmob_0097)	Zmob_0097	phosphoglycerate mutase	Glycolysis/Gluconeogenesis	1	-1000	1000	0		5.4.2.1	KEGG
ENO	2-phospho-D-glycerate hydro-lyase (phosphoenolpyruvate-forming)	2pg[c] <=> h2o[c] + pep[c]	Eno (Zmob_1530)	Zmob_1530	enolase	Glycolysis/Gluconeogenesis	1	-1000	1000	0		4.2.1.11	KEGG
PYK	ATP:pyruvate 2-O-phosphotransferase	adp[c] + h[c] + pep[c] -> atp[c] + pyr[c]	Pyk (Zmob_0682)	Zmob_0682	pyruvate kinase	Glycolysis/Gluconeogenesis	0	0	1000	0		2.7.1.40	KEGG
PDH	pyruvate dehydrogenase	coa[c] + nad[c] + pyr[c] -> accoa[c] + co2[c] + nadh[c]	PdhA (Zmob_1532) and PdhB (Zmob_1533) and PdhC (Zmob_1035) and PdhD (Zmob_1037)	Zmob_1532 and Zmob_1533 and Zmob_1035 and Zmob_1037	pyruvate dehydrogenase	Glycolysis/Gluconeogenesis	0	0	1000	0			KEGG
ALCD2x	alcohol dehydrogenase (ethanol)	etoh[c] + nad[c] <=> acald[c] + h[c] + nadh[c]	AdhP (Zmob_0100) and FrmA (Zmob_1418) and YiaY (Zmob_1541) and Zmob_1443	(Zmob_0100) and (Zmob_1418) and (Zmob_1541) and Zmob_1443	alcohol dehydrogenase	Glycolysis/Gluconeogenesis	1	-1000	1000	0		1.1.1.1	KEGG
PDC	pyruvate decarboxylase	pyr[c] + h[c] -> acald[c] + co2[c]	Pdc (Zmob_1740)	Zmob_1740	pyruvate decarboxylase	Glycolysis/Gluconeogenesis	0	0	1000	0		4.1.1.1	KEGG
ALDD2y	aldehyde dehydrogenase (acetaldehyde, NADP)	acald[c] + h2o[c] + nadp[c] -> ac[c] + 2 h[c] + nadph[c]		Zmob_1390	NADP-acetaldehyde dehydrogenase	Glycolysis/Gluconeogenesis	0	0	1000	0		1.2.1.4	[1]
CS	acetyl-CoA:oxaloacetate C-acetyltransferase	accoa[c] + h2o[c] + oaa[c] -> cit[c] + coa[c] + h[c]	Cs (Zmob_1229)	Zmob_1229	citrate synthase	TCA cycle	0	0	1000	0		2.3.3.1	KEGG
ACONTa	aconitase (half-reaction A, Citrate hydro-lyase)	cit[c] <=> acon-C[c] + h2o[c]	Aco (Zmob_1070)	Zmob_1070	aconitate hydratase	TCA cycle	1	-1000	1000	0		4.2.1.3	KEGG
ACONTb	aconitase (half-reaction B, Isocitrate hydro-lyase)	acon-C[c] + h2o[c] <=> icit[c]	Aco (Zmob_1070)	Zmob_1070	aconitate hydratase	TCA cycle	1	-1000	1000	0		4.2.1.3	KEGG
ICDHyr	Isocitrate:NADP+ oxidoreductase	icit[c] + nadp[c] <=> akg[c] + co2[c] + nadph[c]	Icd (Zmob_1071)	Zmob_1071	isocitrate dehydrogenase	TCA cycle	1	-1000	1000	0		1.1.1.42	KEGG
SUCOAS	Succinate:CoA ligase (ADP-forming)	atp[c] + coa[c] + succ[c] <=> adp[c] + pi[c] + succoa[c]	SucD (Zmob_1094) and SucC (Zmob_1637)	Zmob_1094 and Zmob_1637	succinyl-CoA synthetase	TCA cycle	1	-1000	1000	0		6.2.1.5	KEGG
SUCDi	succinate dehydrogenase (reversible)	q10[c] + succ[c] <=> fum[c] + q10h2[c]	SdhD (Zmob_1095) and SdhC (Zmob_1096)	Zmob_1095 and Zmob_1096	succinate dehydrogenase	TCA cycle	1	-1000	1000	0		1.3.99.1	KEGG
FRD2	fumarate reductase	fum[c] + mql8[c] -> mqn8[c] + succ[c]			fumarate reductase	TCA cycle	0	0	1000	0		1.3.99.1	KEGG
FUM	malate hydro-lyase	fum[c] + h2o[c] <=> mal-L[c]	Fum (Zmob_0042)	Zmob_0042	fumarate hydratase	TCA cycle	1	-1000	1000	0		4.2.1.2	KEGG
CITL	citrate oxaloacetate-lyase	cit[c] -> ac[c] + oaa[c]	CitE (Zmob_1014)	Zmob_1014	citrate lyase subunit beta	TCA cycle	0	0	0	0		4.1.3.6	KEGG
G6PDH1r	beta-D-Glucose-6-phosphate:NADP+ 1-oxoreductase	g6p[c] + nadp[c] <=> 6pgl[c] + h[c] + nadph[c]	Zwf (Zmob_0908)	Zmob_0908	6-Phospho-D-glucono-1,5-lactone lactonohydrolase	pentose phosphate	1	-1000	1000	0		1.1.1.49	KEGG
G6PDH2r	beta-D-Glucose-6-phosphate:NAD+ 1-oxoreductase	g6p[c] + nad[c] <=> 6pgl[c] + h[c] + nadh[c]	Zwf (Zmob_0908)	Zmob_0908	6-Phospho-D-glucono-1,5-lactone lactonohydrolase	pentose phosphate	1	-1000	1000	0		1.1.1.49	[2]
PGL	6-Phospho-D-glucono-1,5-lactone lactonohydrolase	6pgl[c] + h2o[c] -> 6pgc[c] + h[c]	Pgl (Zmob_1640)	Zmob_1640	6-phosphogluconolactonase	pentose phosphate	0	0	1000	0		3.1.1.31	KEGG
GND	phosphogluconate dehydrogenase	6pgc[c] + nadp[c] -> co2[c] + nadph[c] + ru5p-D[c]				pentose phosphate	0	0	1000	0		1.1.1.44	BioCyc
EDD	6-Phospho-D-gluconate hydro-lyase(2-dehydro-3-deoxy-6-phospho-D-gluconate-forming)	6pgc[c] -> 2ddg6p[c] + h2o[c]	Edd (Zmob_0909)	Zmob_0909	phosphogluconate dehydratase	pentose phosphate	0	0	1000	0		4.2.1.12	KEGG
EDA	2-dehydro-3-deoxy-D-gluconate-6-phosphate D-glyceraldehyde-3-phosphate-lyase	2ddg6p[c] -> g3p[c] + pyr[c]	Eda (Zmob_0313)	Zmob_0313	2-dehydro-3-deoxy-phosphogluconate aldolase	pentose phosphate	0	0	1000	0		4.1.2.14	KEGG
GNK	D-Gluconate 6-phosphotransferase	atp[c] + glcn[c] -> 6pgc[c] + adp[c] + h[c]	Gntk (Zmob_1387)	Zmob_1387	gluconokinase	pentose phosphate	0	0	1000	0		2.7.1.12	KEGG
RPE	D-Ribulose-5-phosphate 3-epimerase	ru5p-D[c] <=> xu5p-D[c]	Rpe (Zmob_1180)	Zmob_1180	ribulose 5-phosphate 3-epimerase	pentose phosphate	1	-1000	1000	0		5.1.3.1	KEGG
RPI	D-ribose-5-phosphate aldose-ketose-isomerase	r5p[c] <=> ru5p-D[c]	RpiB (Zmob_0131)	Zmob_0131	ribose-5-phosphate isomerase	pentose phosphate	1	-1000	1000	0		5.1.3.6	KEGG
PRPPS	ATP:D-ribose-5-phosphate diphosphotransferase	atp[c] + r5p[c] <=> amp[c] + h[c] + prpp[c]	Prps (Zmob_1604)	Zmob_1604	ribose-phosphate pyrophosphokinase	pentose phosphate	1	-1000	1000	0		2.7.6.1	KEGG
TKT1	sedoheptulose-7-phosphate:D-glyceraldehyde-3-phosphate glycolaldehyde transferase	r5p[c] + xu5p-D[c] <=> g3p[c] + s7p[c]	Tkt (Zmob_0662)	Zmob_0662	transketolase	pentose phosphate	1	-1000	1000	0		2.2.1.1	KEGG
TKT2	D-Fructose 6-phosphate:D-glyceraldehyde-3-phosphate glycolaldehyde transferase	e4p[c] + xu5p-D[c] <=> f6p[c] + g3p[c]	Tkt (Zmob_0662)	Zmob_0662	transketolase	pentose phosphate	1	-1000	1000	0		2.2.1.1	KEGG
2DGULRGy	2-Dehydro-L-gulonate reductase to gluconate (NADPH)	2dhguln[c] + h[c] + nadph[c] <=> glcn[c] + nadp[c]		Zmob_0504	2-Dehydro-L-gulonate reductase	pentose phosphate	1	-1000	1000	0		1.1.1.215	BioCyc
GLCND	gluconate 2-dehydrogenase	glcn[c] + fad[c] <=> 2dhguln[c] + fadh2[c]		Zmob_0503 or Zmob_0061	gluconate 2-dehydrogenase	pentose phosphate	1	-1000	1000	0		1.1.99.3	BioCyc
GALUi	UTP:alpha-D-glucose-1-phosphate uridylyltransferase	g1p[c] + h[c] + utp[c] -> ppi[c] + udpg[c]	GalU (Zmob_1379)	Zmob_1379	UTP-glucose-1-phosphate uridylyltransferase (irreversible)	Pentose and glucuronate interconversions	0	0	1000	0		2.7.7.9	KEGG
UDPGD	UDP-glucose:NAD+ 6-oxidoreductase	h2o[c] + 2 nad[c] + udpg[c] -> 3 h[c] + 2 nadh[c] + udpglcur[c]	Ugd (Zmob_0475)	Zmob_0475	UDPglucose 6-dehydrogenase	Pentose and glucuronate interconversions	0	0	1000	0		1.1.1.22	KEGG
MTLD	D-Mannitol:NAD+ 2-oxidoreductase	mnl[c] + nadp[c] <=> fru[c] + nadph[c] + h[c]	MtlK (Zmob_1661)	Zmob_1661	mannitol 2-dehydrogenase	Fructose and mannose metabolism	1	-1000	1000	0		1.1.1.67	[3]
HEX7	hexokinase (D-fructose:ATP)	atp[c] + fru[c] -> adp[c] + f6p[c] + h[c]	Mak (Zmob_1421)	Zmob_1421	fructokinase	Fructose and mannose metabolism	0	0	1000	0		2.7.1.4	KEGG
F1A	D-fructose 1-phosphate D-glyceraldehyde-3-phosphate-lyase	f1p[c] <=> dhap[c] + glyald[c]	FbaB (Zmob_0659)	Zmob_0659	fructose-bisphosphate aldolase	Fructose and mannose metabolism	1	-1000	1000	0		4.1.2.13	KEGG
ALCD19	alcohol dehydrogenase (glycerol)	glyald[c] + h[c] + nadh[c] <=> glyc[c] + nad[c]	FrmA (Zmob_1418)	Zmob_1418	alcohol dehydrogenase	Fructose and mannose metabolism	1	-1000	1000	0		1.1.1.1	KEGG
GLPP	Glycerone phosphate phosphohydrolase	dhap[c] + h2o[c] -> dha[c] + pi[c]	PhoN (Zmob_0701)	Zmob_0701	acid phosphatase	Fructose and mannose metabolism	1	-1000	1000	0		3.1.3.2	BioCyc
ALLPI	D-allose-6-phosphate aldose-ketose-isomerase	all6p[c] <=> allul6p[c]	RpiB (Zmob_0131)	Zmob_0131	Allose 6-phosphate isomerase	Fructose and mannose metabolism	1	-1000	1000	0		5.1.3.6	KEGG
PMANM	D-mannose 6-phosphate 1,6-phosphomutase	man1p[c] <=> man6p[c]	CpsG (Zmob_0882)	Zmob_0882	phosphomannomutase	Fructose and mannose metabolism	1	-1000	1000	0		5.4.2.8	KEGG
MAN1PT2	GTP:alpha-D-mannose-1-phosphate guanylyltransferase	gdp[c] + h[c] + man1p[c] -> gdpmann[c] + pi[c]	ManC (Zmob_0103)	Zmob_0103	mannose-1-phosphate guanylyltransferase (GDP)	Fructose and mannose metabolism	0	0	1000	0		2.7.7.13	KEGG
HEX4	hexokinase (D-mannose:ATP)	atp[c] + man[c] -> adp[c] + h[c] + man6p[c]				Fructose and mannose metabolism	0	0	1000	0		2.7.1.7	KEGG
MAN6PI	mannose-6-phosphate isomerase	man6p[c] <=> f6p[c]	ManC (Zmob_0103)	Zmob_0103	mannose-1-phosphate guanylyltransferase (GDP)	Fructose and mannose metabolism	0	0	1000	0		5.3.1.8	KEGG
SBTD	sorbitol dehydrogenase	nad[c] + sbt[c] <=> fru[c] + h[c] + nadh[c]		Zmob_0059		Fructose and mannose metabolism	1	-1000	1000	0		1.1.1.14	[4]
UDPG4E	UDP-glucose 4-epimerase;UDP-alpha-D-glucose 4-epimerase	udpg[c] <=> udpgal[c]	GalE (Zmob_0541)	Zmob_0541	UDP-glucose 4-epimerase	Galactose metabolism	1	-1000	1000	0		5.1.3.2	KEGG
RFH	Raffinose fructohydrolase	raffin[c] + h2o[c] <=> melib[c] + fru[c]	SacA (Zmob_0361)	Zmob_0361	beta-fructofuranosidase	Galactose metabolism	0	0	1000	0		3.2.1.26	KEGG
SFH	Stachyose fructohydrolase	stachy[c] + h2o[c] <=> manit[c] + fru[c]	SacA (Zmob_0361)	Zmob_0361	beta-fructofuranosidase	Galactose metabolism	0	0	1000	0		3.2.1.26	KEGG
UDPGL4E	UDP-glucuronate 4-epimerase	udpglcur[c] <=> udpgalc[c]	GAE (Zmob_0362)	Zmob_0362	UDP-glucuronate 4-epimerase	Starch and sucrose metabolism	1	-1000	1000	0		5.1.3.6	KEGG
S6PH	Sucrose 6-phosphate fructohydrolase	sucr6p[c] + h2o[c] -> fru[c] + g6p[c]	SacA (Zmob_0361)	Zmob_0361	sucrose-6-phosphate hydrolase	Starch and sucrose metabolism	0	0	1000	0		3.2.1.26	KEGG
SUCRH	sucrose alpha-glucohydrolase	sucr[e] + h2o[e] -> fru[e] + glc-D[e]	SacA (Zmob_0361)	Zmob_0361	sucrose alpha-glucohydrolase	Starch and sucrose metabolism	0	0	1000	0		3.2.1.26	KEGG
LEVANS1	sucrose:2,6-beta-D-fructan 6-beta-D-fructosyltransferase	sucr[e] + fru[e] <=> lev1[e] + glc-D[e]	SacB (Zmob_0914) or SacB (Zmob_0915)	Zmob_0914 or Zmob_0915	levansucrase	Starch and sucrose metabolism	1	-1000	1000	0		2.4.1.10	KEGG
LEVANS2	sucrose:2,6-beta-D-fructan 6-beta-D-fructosyltransferase	glc-D[e] + lev2[e] <=> sucr[e] + lev1[e]	SacB (Zmob_0914) or SacB (Zmob_0915)	Zmob_0914 or Zmob_0915	levansucrase	Starch and sucrose metabolism	1	-1000	1000	0		2.4.1.10	KEGG
GFOR	glucose-fructose oxidoreductase	fru[e] + glc-D[e] -> sbt[e] + gllc[e]	GfoR (Zmob_0591)	Zmob_0591	glucose-fructose oxidoreductase	Starch and sucrose metabolism	0	0	1000	0		1.1.99.28	KEGG
GLLCS	gluconolactonase	gllc[e] + h2o[e] -> glcn[e] + h[e]	RGN (Zmob_1209)	Zmob_1209	gluconolactonase	Starch and sucrose metabolism	0	0	1000	0		3.1.1.17	KEGG
GLSD	glucose sorbosone dehydrogenase	glc-D[e] + q10[c] -> gllc[e] + q10h2[c]		Zmob_1085	glucose sorbosone dehydrogenase	Starch and sucrose metabolism	0	0	0	0			[5]
CELS	UDPglucose:1,4-beta-D-glucan 4-beta-D-glucosyltransferase	udpg[c] + cel1[c] <=> udp[c] + cel2[c]	bcsA (Zmob_0237)	Zmob_0237	cellulose synthase (UDP-forming)	Starch and sucrose metabolism	1	-1000	1000	0		2.4.1.12	KEGG
GLCS1	glycogen synthase (ADPGlc)	adpglc[c] -> adp[c] + glycogen[c] + h[c]				Glycogene biosynthesis	0	0	1000	0		2.4.1.21	[6]
GLCP	glycogen phosphorylase	glycogen[c] + pi[c] -> g1p[c]				Glycogene biosynthesis	0	0	1000	0		2.4.1.1	[6]
GLGC	glucose-1-phosphate adenylyltransferase	atp[c] + g1p[c] + h[c] -> adpglc[c] + ppi[c]				Glycogene biosynthesis	0	0	1000	0		2.7.7.27	[6]
ACM6PH	N-acetylmuramate 6-phosphate hydrolase	acmum6p[c] + h2o[c] -> acgam6p[c] + lac-D[c]	MurQ (Zmob_0054)	Zmob_0054	MurNAc-6-P etherase	Amino sugar and nucleotide sugar metabolism	0	0	1000	0		4.2.1.126	KEGG
AGDC	N-Acetyl-D-glucosamine-6-phosphate amidohydrolase	acgam6p[c] + h2o[c] -> ac[c] + gam6p[c]	NagA (Zmob_0344)	Zmob_0344	N-acetylglucosamine-6-phosphate deacetylase	Amino sugar and nucleotide sugar metabolism	0	0	1000	0		3.5.1.25	KEGG
PGAMT	D-Glucosamine 1-phosphate 1,6-phosphomutase	gam1p[c] <=> gam6p[c]	GlmM (Zmob_0308)	Zmob_0308	phosphoglucosamine mutase	Amino sugar and nucleotide sugar metabolism	1	-1000	1000	0		5.4.2.10	KEGG
G1PACT	Acetyl-CoA:D-glucosamine-1-phosphate N-acetyltransferase	accoa[c] + gam1p[c] -> acgam1p[c] + coa[c] + h[c]	GlmU (Zmob_1024)	Zmob_1024	Glucosamine-1-phosphate N-acetyltransferase	Amino sugar and nucleotide sugar metabolism	0	0	1000	0		2.3.1.157	KEGG
UAGDP	UTP:N-acetyl-alpha-D-glucosamine-1-phosphate uridylyltransferase	acgam1p[c] + h[c] + utp[c] -> ppi[c] + uacgam[c]	GlmU (Zmob_1024)	Zmob_1024	UDP-N-acetylglucosamine pyrophosphorylase	Amino sugar and nucleotide sugar metabolism	0	0	1000	0		2.7.7.23	KEGG
GF6PTA	L-glutamine:D-fructose-6-phosphate isomerase	f6p[c] + gln-L[c] -> gam6p[c] + glu-L[c]	GlmS (Zmob_0760)	Zmob_0760	glucosamin-fructose-6-phosphate aminotransferase	Amino sugar and nucleotide sugar metabolism	0	0	1000	0		2.6.1.16	KEGG
ACHXS	chitobiose N-acetylglucosaminohydrolase	chtbs[c] + h2o[c] <=> 2 acgam[c]	NagZ (Zmob_0158)	Zmob_0158	beta-N-acetylhexosaminidase	Amino sugar and nucleotide sugar metabolism	1	-1000	1000	0		3.2.1.52	KEGG
UAGCVT	Phosphoenolpyruvate:UDP-N-acetyl-D-glucosamine 1-carboxyvinyl-transferase	pep[c] + uacgam[c] -> pi[c] + uaccg[c]	MurA (Zmob_1415)	Zmob_1415	UDP-N-acetylglucosamine 1-carboxyvinyltransferase	Amino sugar and nucleotide sugar metabolism	0	0	1000	0		2.5.1.7	KEGG
UAPGR	UDP-N-acetylmuramate:NADP+ oxidoreductase	h[c] + nadph[c] + uaccg[c] -> nadp[c] + uamr[c]	MurB (Zmob_0461)	Zmob_0461	UDP-N-acetylmuramate dehydrogenase	Amino sugar and nucleotide sugar metabolism	0	0	1000	0		1.3.1.98	KEGG
PPC	phosphate:oxaloacetate carboxy-lyase	co2[c] + h2o[c] + pep[c] -> h[c] + oaa[c] + pi[c]	Ppc (Zmob_1625)	Zmob_1625	phosphoenolpyruvate carboxylase	Pyruvate metabolism	0	0	1000	0		4.1.1.31	KEGG
PFL	Acetyl-CoA:formate C-acetyltransferase	coa[c] + pyr[c] -> accoa[c] + for[c]	PflD (Zmob_1564)	Zmob_1564	formate C-acetyltransferase	Pyruvate metabolism	0	0	1000	0		2.3.1.54	KEGG
ME1	(S)-malate:NAD+ oxidoreductase	mal-L[c] + nad[c] -> co2[c] + nadh[c] + pyr[c]	SfcA (Zmob_1237)	Zmob_1237	Malate dehydrogenase	Pyruvate metabolism	0	0	1000	0		1.1.1.38	KEGG
LDH_D	(R)-Lactate:NAD+ oxidoreductase	lac-D[c] + nad[c] <=> h[c] + nadh[c] + pyr[c]	LdhA (Zmob_0098) or Dld (Zmob_0814)	Zmob_0098 or Zmob_0814	D-lactate dehydrogenase	Pyruvate metabolism	1	-1000	1000	0		1.1.1.28	KEGG
LDH_D2	D-lactate dehydrogenase	lac-D[c] + q10[c] -> pyr[c] + q10h2[c]	Dld (Zmob_0814)	Zmob_0814	D-lactate dehydrogenase	Pyruvate metabolism	0	0	1000	0		1.1.2.4	[5]
GLYOX	(R)-S-Lactoylglutathione hydrolase	h2o[c] + lgt-S[c] -> gthrd[c] + h[c] + lac-D[c]	GloB (Zmob_0527)	Zmob_0527	hydroxyacylglutathione hydrolase	Pyruvate metabolism	0	0	1000	0		3.1.2.6	KEGG
LGTHL	(R)-S-Lactoylglutathione methylglyoxal-lyase (isomerizing)	gthrd[c] + mthgxl[c] -> lgt-S[c]	GloA (Zmob_0526)	Zmob_0526	lactoylglutathione lyase	Pyruvate metabolism	0	0	1000	0		4.4.1.5	KEGG
LALDO2x	(R)-Lactaldehyde:NAD+ oxidoreductase	h[c] + mthgxl[c] + nadh[c] -> lald-D[c] + nad[c]	GhrA (Zmob_1284)	Zmob_1284	methylglyoxal reductase	Pyruvate metabolism	0	0	1000	0		1.1.1.79	KEGG
HCITS	acetyl-CoA:2-oxoglutarate C-acetyltransferase	accoa[c] + h2o[c] + akg[c] <=> hcit[c] + coa[c] + h[c]	NifV (Zmob_1319)	Zmob_1319	homocitrate synthase NifV	Pyruvate metabolism	1	-1000	1000	0		2.3.3.14	KEGG
PGLYCP	2-Phosphoglycolate phosphohydrolase	2pglyc[c] + h2o[c] -> glyclt[c] + pi[c]	Gph (Zmob_1023) or Gph (Zmob_1350)	Zmob_1023 or Zmob_1350	phosphoglycolate phosphatase	Glyoxylate and dicarboxylate metabolism	0	0	1000	0		3.1.3.18	KEGG
HPYRRy	D-Glycerate:NADP+ 2-oxidoreductase	h[c] + hpyr[c] + nadph[c] -> glyc-R[c] + nadp[c]	GhrA (Zmob_1284)	Zmob_1284	hydroxypyruvate reductase A	Glyoxylate and dicarboxylate metabolism	0	0	1000	0		1.1.1.79 and 1.1.1.81	KEGG
GLYCLTDy	glycolate:NADP+ oxidoreductase	glx[c] + h[c] + nadph[c] -> glyclt[c] + nadp[c]	GhrA (Zmob_1284)	Zmob_1284	Glycolate dehydrogenase	Glyoxylate and dicarboxylate metabolism	0	0	1000	0		1.1.1.79	KEGG
GLXCL	glyoxalate carboligase	2 glx[c] + h[c] -> 2h3oppan[c] + co2[c]				Glyoxylate and dicarboxylate metabolism	0	0	1000	0		4.1.1.47	[7]
GLYCTO3	Glycolate oxidase	glyclt[c] + mqn8[c] -> glx[c] + mql8[c]				Glyoxylate and dicarboxylate metabolism	0	0	1000	0			[7]
HPYRI	hydroxypyruvate isomerase	hpyr[c] <=> 2h3oppan[c]				Glyoxylate and dicarboxylate metabolism	1	-1000	1000	0		5.3.1.22	[7]
GLYCK	ATP:(R)-glycerate 3-phosphotransferase	atp[c] + glyc-R[c] -> 3pg[c] + adp[c] + h[c]	GlxK (Zmob_0758)	Zmob_0758	glycerate kinase	Glyoxylate and dicarboxylate metabolism	0	0	1000	0		2.7.1.31	KEGG
4HOGL	4-hydroxy-2-oxoglutarate glyoxylate-lyase (pyruvate-forming)	4h2og[c] <=> pyr[c] + glx[c]	Eda (Zmob_0313)	Zmob_0313	2-dehydro-3-deoxyphosphogluconate aldolase	Glyoxylate and dicarboxylate metabolism	1	-1000	1000	0		4.1.3.16	KEGG
CAT	hydrogen-peroxide:hydrogen-peroxide oxidoreductase	2 h2o2[c] -> 2 h2o[c] + o2[c]	KatE (Zmob_0385)	Zmob_0385	catalase	Unassigned	0	0	1000	0		1.11.1.6	KEGG
OBTFL	propanoyl-CoA:formate C-propanoyltransferase	2obut[c] + coa[c] -> for[c] + ppcoa[c]	PflD (Zmob_1564)	Zmob_1564	formate C-acetyltransferase	Propanoate metabolism	0	0	1000	0		2.3.1.54	KEGG
ACLS	pyruvate:pyruvate acetaldehydetransferase (decarboxylating);	h[c] + 2 pyr[c] -> alac-S[c] + co2[c]	IvlH (Zmob_0187) and IlvB (Zmob_0188 and Zmob_0593)	Zmob_0187 and Zmob_0188 and Zmob_0593	acetolactate synthase	Butanoate metabolism	0	0	1000	0		2.2.1.6	KEGG
DACS	diacetyl synthase	alac-S[c] + nad[c] -> dactyl[c] + nadh[c] + co2[c]	SPONTANEOUS (s0001)	s0001	SPONTANEOUS	Butanoate metabolism	0	0	1000	0			KEGG
DACR	diacetyl reductase	dactyl[c] + nadh[c] + h[c] -> nad[c] + actin[c]	BudC (Zmob_0867)	Zmob_0867	diacetyl reductase	Butanoate metabolism	0	0	1000	0		1.1.1.304	KEGG
BUTDH	(S,S)-butanediol dehydrogenase	actin[c] + nadh[c] + h[c] <=> nad[c] + butdol[c]	BudC (Zmob_0867)	Zmob_0867	(S,S)-butanediol dehydrogenase	Butanoate metabolism	1	-1000	1000	0		1.1.1.76	KEGG
SSALy	Succinate-semialdehyde:NADP+ oxidoreductase	h2o[c] + nadp[c] + sucsal[c] -> 2 h[c] + nadph[c] + succ[c]	GabD (Zmob_1390)	Zmob_1390	succinate-semialdehyde dehydrogenase (NADP+)	Butanoate metabolism	0	0	1000	0		1.2.1.16	KEGG
MI1PS	myo-inositol-1-phosphate synthase	g6p[c] -> mi1p-D[c]			myo-inositol-1-phosphate synthase	Inositol phosphate metabolism	0	0	1000	0		5.5.1.4	[6]
MI1PP	1D-myo-Inositol 1-phosphate phosphohydrolase	h2o[c] + mi1p-D[c] -> inost[c] + pi[c]	SuhB (Zmob_0877)	Zmob_0877	inositol monophosphatase	Inositol phosphate metabolism	0	0	1000	0		3.1.3.25	KEGG
PHYTSpp	Phytase (periplasm)	6 h2o[c] + minohp[c] -> inost[c] + 6 pi[c]	AppA (Zmob_0756)	Zmob_0756	4-phytase / acid phosphatase	Inositol phosphate metabolism	0	0	1000	0		3.1.3.26	KEGG
NADH5	NADH:acceptor oxidoreductase	h[c] + nadh[c] + q10[c] -> nad[c] + q10h2[c]	Ndh (Zmob_0212)	Zmob_0212	NADH dehydrogenase	Oxidative phosphorylation	0	0	1000	0		1.6.99.3	KEGG
NADPHO	NADPH:acceptor oxidoreductase	h[c] + nadph[c] + q10[c] -> nadp[c] + q10h2[c]	Ndh (Zmob_0212)	Zmob_0212	NADPH dehydrogenase	Oxidative phosphorylation	0	0	1000	0		1.6.99.3	[5]
QCYT	Ubiquinol:ferricytochrome-c oxidoreductase	q10[c] + 2 froc[c] + 2 h[e] <=> q10h2[c] + 2 fric[c]	ISP (Zmob_0349) and Cytb (Zmob_0348) and Cyt1 (Zmob_0347)	Zmob_0347 and Zmob_0348 and Zmob_0349	ubiquinol-cytochrome c reductase	Oxidative phosphorylation	1	-1000	1000	0		1.10.2.2	KEGG
CYTBDpp	cytochrome oxidase bd (ubiquinol-8: 2 protons) (periplasm)	2 h[c] + 0.5 o2[c] + q10h2[c] -> h2o[c] + q10[c] + 2 h[e]	CydA (Zmob_1563) and CydB (Zmob_1562)	Zmob_1562 and Zmob_1563	cytochrome bd ubiquinol oxidase	Oxidative phosphorylation	0	0	1000	0		1.10.3.-	KEGG
ATPS4rpp	ATP synthase (four protons for one ATP) (periplasm)	adp[c] + pi[c] + 4 h[e] <=> atp[c] + 3 h[c] + h2o[c]	AtpD (Zmob_0801) and AtpA (Zmob_0799) and AtpG (Zmob_0800) and AtpH (Zmob_0798) and AtpC (Zmob_0802) and AtpE (Zmob_0611) and AtpB (Zmob_0612) and AtpF (Zmob_0609 and Zmob_0610)	Zmob_0801 and Zmob_0799 and Zmob_0800 and Zmob_0798 and Zmob_0802 and Zmob_0611 and Zmob_0612 and Zmob_0609 and Zmob_0610	F-type H+-transporting ATPase	Oxidative phosphorylation	1	-10	50	0		3.6.3.14	KEGG
PPA	inorganic diphosphatase	h2o[c] + ppi[c] -> h[c] + 2 pi[c]	Ppa (Zmob_1615)	Zmob_1615	inorganic pyrophosphatase	Oxidative phosphorylation	0	0	1000	0		3.6.1.1	KEGG
PPK2r	polyphosphate kinase	atp[c] + ppi[c] <=> adp[c] + pppi[c]	Ppk (Zmob_0573)	Zmob_0573	polyphosphate kinase	Oxidative phosphorylation	1	-1000	1000	0		2.7.4.1	KEGG
PPKr	polyphosphate kinase	atp[c] + pi[c] <=> adp[c] + ppi[c]	Ppk (Zmob_0573)	Zmob_0573	polyphosphate kinase	Oxidative phosphorylation	1	-1000	1000	0		2.7.4.1	KEGG
CYTCP	cytochrome c peroxidase	2 h2o[c] + 2 fric[c] <=> h2o2[c] + 2 froc[c] + 2 h[c]		Zmob_0191	cytochrome c peroxidase	Unassigned	1	-1000	1000	0		1.11.1.5	BioCyc
GTHPi	glutathione peridoxase	2 gthrd[c] + h2o2[c] -> gthox[c] + 2 h2o[c]		Zmob_1402	glutathione peridoxase	Unassigned	0	0	1000	0		1.11.1.9	BioCyc
FALGTHLs	formaldehyde glutathione ligase (spontaneous)	fald[c] + gthrd[c] <=> hmgth[c]	SPONTANEOUS (s0001)	s0001	SPONTANEOUS		1	-1000	1000	0		4.4.1.22	BioCyc
FALDH2	S-(hydroxymethyl)glutathione dehydrogenase	hmgth[c] + nad[c] <=> Sfglutth[c] + h[c] + nadh[c]	FrmA (Zmob_1418)	Zmob_1418	S-(hydroxymethyl)glutathione dehydrogenase	Methane metabolism	0	0	1000	0		1.1.1.284	KEGG
SFGTHi	S-Formylglutathione hydralase	Sfglutth[c] + h2o[c] -> for[c] + gthrd[c] + h[c]				Methane metabolism	0	0	1000	0		3.1.2.12	BioCyc
HCO3E	carbonate hydro-lyase (carbon-dioxide-forming)	co2[c] + h2o[c] <=> h[c] + hco3[c]	CynT (Zmob_0194)	Zmob_0194	carbonate dehydratase	Unassigned	1	-1000	1000	0		4.2.1.1	KEGG
NITGS	reduced ferredoxin:dinitrogen oxidoreductase (ATP-hydrolysing)	16 atp[c] + n2[c] + 8 frdrd[c] + 8 h[c] + 16 h2o[c] <=> 16 pi[c] + 16 adp[c] + 8 frdox[c] + 2 nh4[c] + h2[e]	NifK (Zmob_1329) and NifD (Zmob_1330) and NifH (Zmob_1331)	Zmob_1329 and Zmob_1330 and Zmob_1331	nitrogenase molybdenum-iron protein	Nitrogen metabolism	0	0	1000	0		1.18.6.1	KEGG
NO3R1bpp	Nitrate reductase (Ubiquinol-8)	q10h2[c] + no3[c] + 2 h[c] -> q10[c] + h2o[c] + no2[c] + 2 h[e]			Nitrate reductase	Nitrogen metabolism	0	0	1000	0		1.7.99.4	[7]
NTRIR2x	nitrite Reductase (NADH)	5 h[c] + 3 nadh[c] + no2[c] -> 2 h2o[c] + 3 nad[c] + nh4[c]			nitrite Reductase	Nitrogen metabolism	0	0	1000	0			[7]
SADT2	ATP:sulfate adenylyltransferase	atp[c] + so4[c] + h[c] -> aps[c] + ppi[c]	CysD (Zmob_1194) and CysN (Zmob_1195)	Zmob_1194 and Zmob_1195	sulfate adenylyltransferase	Sulfur metabolism	0	0	1000	0		2.7.7.4	KEGG
ADSK	ATP:adenylylsulfate 3'-phosphotransferase	aps[c] + atp[c] -> adp[c] + h[c] + paps[c]	CysC (Zmob_1196)	Zmob_1196	adenylylsulfate kinase	Sulfur metabolism	0	0	1000	0		2.7.1.25	KEGG
PAPSR	sulfite:oxidized-thioredoxin oxidoreductase	paps[c] + trdrd[c] -> 2 h[c] + pap[c] + so3[c] + trdox[c]	CysH (Zmob_1192)	Zmob_1192	phosphoadenosine phosphosulfate reductase	Sulfur metabolism	0	0	1000	0		1.8.4.8	KEGG
SULRi	hydrogen-sulfide:NADP+ oxidoreductase	5 h[c] + 3 nadph[c] + so3[c] -> 3 h2o[c] + h2s[c] + 3 nadp[c]	CysJ (Zmob_1190) and CysI (Zmob_1191)	Zmob_1190 and Zmob_1191	sulfite reductase (NADPH) flavoprotein	Sulfur metabolism	0	0	1000	0		1.8.1.2	KEGG
BPNT	Adenosine 3',5'-bisphosphate 3'-phosphohydrolase	h2o[c] + pap[c] -> amp[c] + pi[c]	CysQ (Zmob_0544)	Zmob_0554	3'(2'), 5'-bisphosphate nucleotidase	Sulfur metabolism	0	0	1000	0		3.1.3.7	KEGG
ACOATA	Acetyl-CoA ACP transacylase	ACP[c] + accoa[c] <=> acACP[c] + coa[c]	FabH (Zmob_1271)	Zmob_1271	3-oxoacyl-[acyl-carrier-protein] synthase	Fatty acid biosynthesis	1	-1000	1000	0		2.3.1.180	KEGG
ACCOAC	Acetyl-CoA:carbon-dioxide ligase (ADP-forming)	accoa[c] + atp[c] + hco3[c] -> adp[c] + h[c] + malcoa[c] + pi[c]	AccB (Zmob_0552) and AccC (Zmob_0553) and AccD (Zmob_1108) and AccA (Zmob_1123)	Zmob_0553	acetyl-CoA carboxylase	Fatty acid biosynthesis	0	0	1000	0		6.4.1.2	KEGG
MCOATA	Malonyl-CoA-ACP transacylase	ACP[c] + malcoa[c] <=> coa[c] + malACP[c]	FabD (Zmob_0111)	Zmob_0111	malonyl CoA-acyl carrier protein transacylase	Fatty acid biosynthesis	1	-1000	1000	0		2.3.1.39	KEGG
KAS14	beta-ketoacyl-ACP synthase	acACP[c] + h[c] + malACP[c] -> ACP[c] + actACP[c] + co2[c]	FabF (Zmob_0064) and FabH (Zmob_1271)	Zmob_0064 or Zmob_1271	3-oxoacyl-(acyl-carrier-protein) synthase	Fatty acid biosynthesis	0	0	1000	0		2.3.1.180	KEGG
3OAR40	3-oxoacyl-[acyl-carrier-protein] reductase (n-C4:0)	actACP[c] + h[c] + nadph[c] <=> 3hbutACP[c] + nadp[c]	FabG (Zmob_0122)	Zmob_0122	3-oxoacyl-(acyl-carrier-protein) reductase	Fatty acid biosynthesis	1	-1000	1000	0		1.1.1.100	KEGG
3HAD40	3-hydroxyacyl-[acyl-carrier-protein] dehydratase (n-C4:0)	3hbutACP[c] -> but2eACP[c] + h2o[c]	FabZ (Zmob_0181)	Zmob_0181	beta-hydroxyacyl-(ACP) dehydratase FabZ	Fatty acid biosynthesis	0	0	1000	0		4.2.1.59	KEGG
EAR40x	enoyl-[acyl-carrier-protein] reductase (NADH) (n-C4:0)	but2eACP[c] + h[c] + nadh[c] -> butACP[c] + nad[c]	FabI (Zmob_1448)	Zmob_1448	enoyl-[acyl-carrier protein] reductase I	Fatty acid biosynthesis	0	0	1000	0		1.3.1.9	KEGG
EAR40y	enoyl-[acyl-carrier-protein] reductase (NADPH) (n-C4:0)	but2eACP[c] + h[c] + nadph[c] -> butACP[c] + nadp[c]	FabI (Zmob_1448)	Zmob_1448	enoyl-[acyl-carrier protein] reductase I	Fatty acid biosynthesis	0	0	1000	0		1.3.1.10	KEGG
3OAS60	3-oxoacyl-[acyl-carrier-protein] synthase (n-C6:0)	butACP[c] + h[c] + malACP[c] -> 3ohexACP[c] + ACP[c] + co2[c]	FabF (Zmob_0064)	Zmob_0064	3-oxoacyl-[acyl-carrier-protein] synthase II	Fatty acid biosynthesis	0	0	1000	0		2.3.1.179	KEGG
3OAR60	3-oxoacyl-[acyl-carrier-protein] reductase (n-C6:0)	3ohexACP[c] + h[c] + nadph[c] <=> 3hhexACP[c] + nadp[c]	FabG (Zmob_0112)	Zmob_0112	3-oxoacyl-[acyl-carrier protein] reductase	Fatty acid biosynthesis	1	-1000	1000	0		1.1.1.100	KEGG
3HAD60	3-hydroxyacyl-[acyl-carrier-protein] dehydratase (n-C6:0)	3hhexACP[c] -> h2o[c] + thex2eACP[c]	FabZ (Zmob_0181)	Zmob_0181	beta-hydroxyacyl-(ACP) dehydratase FabZ	Fatty acid biosynthesis	0	0	1000	0		4.2.1.59	KEGG
EAR60x	enoyl-[acyl-carrier-protein] reductase (NADH) (n-C6:0)	h[c] + nadh[c] + thex2eACP[c] -> hexACP[c] + nad[c]	FabI (Zmob_1448)	Zmob_1448	enoyl-[acyl-carrier protein] reductase I	Fatty acid biosynthesis	0	0	1000	0		1.3.1.9	KEGG
EAR60y	enoyl-[acyl-carrier-protein] reductase (NADPH) (n-C6:0)	h[c] + nadph[c] + thex2eACP[c] -> hexACP[c] + nadp[c]	FabI (Zmob_1448)	Zmob_1448	enoyl-[acyl-carrier protein] reductase I	Fatty acid biosynthesis	0	0	1000	0		1.3.1.10	KEGG
3OAS80	3-oxoacyl-[acyl-carrier-protein] synthase (n-C8:0)	h[c] + hexACP[c] + malACP[c] -> 3ooctACP[c] + ACP[c] + co2[c]	FabF (Zmob_0064)	Zmob_0064	3-oxoacyl-[acyl-carrier-protein] synthase II	Fatty acid biosynthesis	0	0	1000	0		2.3.1.179	KEGG
3OAR80	3-oxoacyl-[acyl-carrier-protein] reductase (n-C8:0)	3ooctACP[c] + h[c] + nadph[c] <=> 3hoctACP[c] + nadp[c]	FabG (Zmob_0112)	Zmob_0112	3-oxoacyl-[acyl-carrier protein] reductase	Fatty acid biosynthesis	1	-1000	1000	0		1.1.1.100	KEGG
3HAD80	3-hydroxyacyl-[acyl-carrier-protein] dehydratase (n-C8:0)	3hoctACP[c] -> h2o[c] + toct2eACP[c]	FabZ (Zmob_0181)	Zmob_0181	beta-hydroxyacyl-(ACP) dehydratase FabZ	Fatty acid biosynthesis	0	0	1000	0		4.2.1.59	KEGG
EAR80x	enoyl-[acyl-carrier-protein] reductase (NADH) (n-C8:0)	h[c] + nadh[c] + toct2eACP[c] -> nad[c] + ocACP[c]	FabI (Zmob_1448)	Zmob_1448	enoyl-[acyl-carrier protein] reductase I	Fatty acid biosynthesis	0	0	1000	0		1.3.1.9	KEGG
EAR80y	enoyl-[acyl-carrier-protein] reductase (NADPH) (n-C8:0)	h[c] + nadph[c] + toct2eACP[c] -> nadp[c] + ocACP[c]	FabI (Zmob_1448)	Zmob_1448	enoyl-[acyl-carrier protein] reductase I	Fatty acid biosynthesis	0	0	1000	0		1.3.1.10	KEGG
3OAS100	3-oxoacyl-[acyl-carrier-protein] synthase (n-C10:0)	h[c] + malACP[c] + ocACP[c] -> 3odecACP[c] + ACP[c] + co2[c]	FabF (Zmob_0064)	Zmob_0064	3-oxoacyl-[acyl-carrier-protein] synthase II	Fatty acid biosynthesis	0	0	1000	0		2.3.1.179	KEGG
3OAR100	3-oxoacyl-[acyl-carrier-protein] reductase (n-C10:0)	3odecACP[c] + h[c] + nadph[c] <=> 3hdecACP[c] + nadp[c]	FabG (Zmob_0112)	Zmob_0112	3-oxoacyl-[acyl-carrier protein] reductase	Fatty acid biosynthesis	1	-1000	1000	0		1.1.1.100	KEGG
3HAD100	3-hydroxyacyl-[acyl-carrier-protein] dehydratase (n-C10:0)	3hdecACP[c] -> h2o[c] + tdec2eACP[c]	FabZ (Zmob_0181)	Zmob_0181	beta-hydroxyacyl-(ACP) dehydratase FabZ	Fatty acid biosynthesis	0	0	1000	0		4.2.1.59	KEGG
EAR100x	enoyl-[acyl-carrier-protein] reductase (NADH) (n-C10:0)	h[c] + nadh[c] + tdec2eACP[c] -> dcaACP[c] + nad[c]	FabI (Zmob_1448)	Zmob_1448	enoyl-[acyl-carrier protein] reductase I	Fatty acid biosynthesis	0	0	1000	0		1.3.1.9	KEGG
EAR100y	enoyl-[acyl-carrier-protein] reductase (NADPH) (n-C10:0)	h[c] + nadph[c] + tdec2eACP[c] -> dcaACP[c] + nadp[c]	FabI (Zmob_1448)	Zmob_1448	enoyl-[acyl-carrier protein] reductase I	Fatty acid biosynthesis	0	0	1000	0		1.3.1.10	KEGG
3OAS120	3-oxoacyl-[acyl-carrier-protein] synthase (n-C12:0)	dcaACP[c] + h[c] + malACP[c] -> 3oddecACP[c] + ACP[c] + co2[c]	FabF (Zmob_0064)	Zmob_0064	3-oxoacyl-[acyl-carrier-protein] synthase II	Fatty acid biosynthesis	0	0	1000	0		2.3.1.179	KEGG
3OAR120	3-oxoacyl-[acyl-carrier-protein] reductase (n-C12:0)	3oddecACP[c] + h[c] + nadph[c] <=> 3hddecACP[c] + nadp[c]	FabG (Zmob_0112)	Zmob_0112	3-oxoacyl-[acyl-carrier protein] reductase	Fatty acid biosynthesis	1	-1000	1000	0		1.1.1.100	KEGG
3HAD120	3-hydroxyacyl-[acyl-carrier-protein] dehydratase (n-C12:0)	3hddecACP[c] -> h2o[c] + tddec2eACP[c]	FabZ (Zmob_0181)	Zmob_0181	beta-hydroxyacyl-(ACP) dehydratase FabZ	Fatty acid biosynthesis	0	0	1000	0		4.2.1.59	KEGG
EAR120x	enoyl-[acyl-carrier-protein] reductase (NADH) (n-C12:0)	h[c] + nadh[c] + tddec2eACP[c] -> ddcaACP[c] + nad[c]	FabI (Zmob_1448)	Zmob_1448	enoyl-[acyl-carrier protein] reductase I	Fatty acid biosynthesis	0	0	1000	0		1.3.1.9	KEGG
EAR120y	enoyl-[acyl-carrier-protein] reductase (NADPH) (n-C12:0)	h[c] + nadph[c] + tddec2eACP[c] -> ddcaACP[c] + nadp[c]	FabI (Zmob_1448)	Zmob_1448	enoyl-[acyl-carrier protein] reductase I	Fatty acid biosynthesis	0	0	1000	0		1.3.1.10	KEGG
DDACH	dodecanoyl-[acyl-carrier-protein] hydrolase	ddcaACP[c] + h2o[c] -> ddca[c] + ACP[c] + h[c]			dodecanoyl-[acyl-carrier-protein] hydrolase	Fatty acid biosynthesis	0	0	1000	0		3.1.2.21	KEGG
T2DECAI	trans-2-decenoyl-ACP isomerase	tdec2eACP[c] <=> cdec3eACP[c]	trans-2-decenoyl-ACP isomerase			Fatty acid biosynthesis	1	-1000	1000	0			[7]
3OAS121	3-oxoacyl-[acyl-carrier-protein] synthase (n-C12:1)	cdec3eACP[c] + h[c] + malACP[c] -> 3ocddec5eACP[c] + ACP[c] + co2[c]	FabF (Zmob_0064)	Zmob_0064	3-oxoacyl-[acyl-carrier-protein] synthase II	Fatty acid biosynthesis	0	0	1000	0		2.3.1.179	KEGG
3OAR121	3-oxoacyl-[acyl-carrier-protein] reductase (n-C12:1)	3ocddec5eACP[c] + h[c] + nadph[c] -> 3hcddec5eACP[c] + nadp[c]	FabG (Zmob_0112)	Zmob_0112	3-oxoacyl-[acyl-carrier protein] reductase	Fatty acid biosynthesis	0	0	1000	0		1.1.1.100	KEGG
3HAD121	3-hydroxyacyl-[acyl-carrier-protein] dehydratase (n-C12:1)	3hcddec5eACP[c] -> h2o[c] + t3c5ddeceACP[c]	FabZ (Zmob_0181)	Zmob_0181	beta-hydroxyacyl-(ACP) dehydratase FabZ	Fatty acid biosynthesis	0	0	1000	0		4.2.1.59	KEGG
EAR121x	enoyl-[acyl-carrier-protein] reductase (NADH) (n-C12:1)	h[c] + nadh[c] + t3c5ddeceACP[c] -> cddec5eACP[c] + nad[c]	FabI (Zmob_1448)	Zmob_1448	enoyl-[acyl-carrier protein] reductase I	Fatty acid biosynthesis	0	0	1000	0		1.3.1.9	KEGG
EAR121y	enoyl-[acyl-carrier-protein] reductase (NADPH) (n-C12:1)	h[c] + nadph[c] + t3c5ddeceACP[c] -> cddec5eACP[c] + nadp[c]	FabI (Zmob_1448)	Zmob_1448	enoyl-[acyl-carrier protein] reductase I	Fatty acid biosynthesis	0	0	1000	0		1.3.1.10	KEGG
3OAS140	3-oxoacyl-[acyl-carrier-protein] synthase (n-C14:0)	ddcaACP[c] + h[c] + malACP[c] -> 3omrsACP[c] + ACP[c] + co2[c]	FabF (Zmob_0064)	Zmob_0064	3-oxoacyl-[acyl-carrier-protein] synthase II	Fatty acid biosynthesis	0	0	1000	0		2.3.1.179	KEGG
3OAR140	3-oxoacyl-[acyl-carrier-protein] reductase (n-C14:0)	3omrsACP[c] + h[c] + nadph[c] <=> 3hmrsACP[c] + nadp[c]	FabG (Zmob_0112)	Zmob_0112	3-oxoacyl-[acyl-carrier protein] reductase	Fatty acid biosynthesis	1	-1000	1000	0		1.1.1.100	KEGG
3HAD140	3-hydroxyacyl-[acyl-carrier-protein] dehydratase (n-C14:0)	3hmrsACP[c] -> h2o[c] + tmrs2eACP[c]	FabZ (Zmob_0181)	Zmob_0181	beta-hydroxyacyl-(ACP) dehydratase FabZ	Fatty acid biosynthesis	0	0	1000	0		4.2.1.59	KEGG
EAR140x	enoyl-[acyl-carrier-protein] reductase (NADH) (n-C14:0)	h[c] + nadh[c] + tmrs2eACP[c] -> myrsACP[c] + nad[c]	FabI (Zmob_1448)	Zmob_1448	enoyl-[acyl-carrier protein] reductase I	Fatty acid biosynthesis	0	0	1000	0		1.3.1.9	KEGG
EAR140y	enoyl-[acyl-carrier-protein] reductase (NADPH) (n-C14:0)	h[c] + nadph[c] + tmrs2eACP[c] -> myrsACP[c] + nadp[c]	FabI (Zmob_1448)	Zmob_1448	enoyl-[acyl-carrier protein] reductase I	Fatty acid biosynthesis	0	0	1000	0		1.3.1.10	KEGG
TDACH	Tetradecanoyl-[acyl-carrier protein] hydrolase	myrsACP[c] + h2o[c] -> ttdca[c] + ACP[c] + h[c]			Tetradecanoyl-[acyl-carrier protein] hydrolase	Fatty acid biosynthesis	0	0	1000	0		3.1.2.14	[7]
3OAS141	3-oxoacyl-[acyl-carrier-protein] synthase (n-C14:1)	cddec5eACP[c] + h[c] + malACP[c] -> 3ocmrs7eACP[c] + ACP[c] + co2[c]	FabF (Zmob_0064)	Zmob_0064	3-oxoacyl-[acyl-carrier-protein] synthase II	Fatty acid biosynthesis	0	0	1000	0		2.3.1.179	BioCyc
3OAR141	3-oxoacyl-[acyl-carrier-protein] reductase (n-C14:1)	3ocmrs7eACP[c] + h[c] + nadph[c] -> 3hcmrs7eACP[c] + nadp[c]	FabG (Zmob_0112)	Zmob_0112	3-oxoacyl-[acyl-carrier protein] reductase	Fatty acid biosynthesis	0	0	1000	0		1.1.1.100	KEGG
3HAD141	3-hydroxyacyl-[acyl-carrier-protein] dehydratase (n-C14:1)	3hcmrs7eACP[c] -> h2o[c] + t3c7mrseACP[c]	FabZ (Zmob_0181)	Zmob_0181	beta-hydroxyacyl-(ACP) dehydratase FabZ	Fatty acid biosynthesis	0	0	1000	0		4.2.1.59	KEGG
EAR141x	enoyl-[acyl-carrier-protein] reductase (NADH) (n-C14:1)	h[c] + nadh[c] + t3c7mrseACP[c] -> nad[c] + tdeACP[c]	FabI (Zmob_1448)	Zmob_1448	enoyl-[acyl-carrier protein] reductase I	Fatty acid biosynthesis	0	0	1000	0		1.3.1.9	KEGG
EAR141y	enoyl-[acyl-carrier-protein] reductase (NADPH) (n-C14:1)	h[c] + nadph[c] + t3c7mrseACP[c] -> nadp[c] + tdeACP[c]	FabI (Zmob_1448)	Zmob_1448	enoyl-[acyl-carrier protein] reductase I	Fatty acid biosynthesis	0	0	1000	0		1.3.1.10	KEGG
TDEACH	cis-tetradec-7-enoyl-[acyl-carrier protein] hydrolase	tdeACP[c] + h2o[c] -> ttdcea[c] + ACP[c] + h[c]				Fatty acid biosynthesis	0	0	1000	0		3.1.2.14	[7]
3OAS160	3-oxoacyl-[acyl-carrier-protein] synthase (n-C16:0)	h[c] + malACP[c] + myrsACP[c] -> 3opalmACP[c] + ACP[c] + co2[c]	FabF (Zmob_0064)	Zmob_0064	3-oxoacyl-[acyl-carrier-protein] synthase II	Fatty acid biosynthesis	0	0	1000	0		2.3.1.179	BioCyc
3OAR160	3-oxoacyl-[acyl-carrier-protein] reductase (n-C16:0)	3opalmACP[c] + h[c] + nadph[c] <=> 3hpalmACP[c] + nadp[c]	FabG (Zmob_0112)	Zmob_0112	3-oxoacyl-[acyl-carrier protein] reductase	Fatty acid biosynthesis	1	-1000	1000	0		1.1.1.100	KEGG
3HAD160	3-hydroxyacyl-[acyl-carrier-protein] dehydratase (n-C16:0)	3hpalmACP[c] -> h2o[c] + tpalm2eACP[c]	FabZ (Zmob_0181)	Zmob_0181	beta-hydroxyacyl-(ACP) dehydratase FabZ	Fatty acid biosynthesis	0	0	1000	0		4.2.1.59	KEGG
EAR160x	enoyl-[acyl-carrier-protein] reductase (NADH) (n-C16:0)	h[c] + nadh[c] + tpalm2eACP[c] -> nad[c] + palmACP[c]	FabI (Zmob_1448)	Zmob_1448	enoyl-[acyl-carrier protein] reductase I	Fatty acid biosynthesis	0	0	1000	0		1.3.1.9	KEGG
EAR160y	enoyl-[acyl-carrier-protein] reductase (NADPH) (n-C16:0)	h[c] + nadph[c] + tpalm2eACP[c] -> nadp[c] + palmACP[c]	FabI (Zmob_1448)	Zmob_1448	enoyl-[acyl-carrier protein] reductase I	Fatty acid biosynthesis	0	0	1000	0		1.3.1.10	KEGG
OLACH	Oleoyl-[acyl-carrier protein] hydrolase	palmACP[c] + h2o[c] <=> hdca[c] + ACP[c] + h[c]				Fatty acid biosynthesis	1	-1000	1000	0		3.1.2.14	[7]
3OAS161	3-oxoacyl-[acyl-carrier-protein] synthase (n-C16:1)	h[c] + malACP[c] + tdeACP[c] -> 3ocpalm9eACP[c] + ACP[c] + co2[c]	FabF (Zmob_0064)	Zmob_0064	3-oxoacyl-[acyl-carrier-protein] synthase II	Fatty acid biosynthesis	0	0	1000	0		2.3.1.179	BioCyc
3OAR161	3-oxoacyl-[acyl-carrier-protein] reductase (n-C16:1)	3ocpalm9eACP[c] + h[c] + nadph[c] -> 3hcpalm9eACP[c] + nadp[c]	FabG (Zmob_0112)	Zmob_0112	3-oxoacyl-[acyl-carrier protein] reductase	Fatty acid biosynthesis	0	0	1000	0		1.1.1.100	KEGG
3HAD161	3-hydroxyacyl-[acyl-carrier-protein] dehydratase (n-C16:1)	3hcpalm9eACP[c] -> h2o[c] + t3c9palmeACP[c]	FabZ (Zmob_0181)	Zmob_0181	beta-hydroxyacyl-(ACP) dehydratase FabZ	Fatty acid biosynthesis	0	0	1000	0		4.2.1.59	KEGG
EAR161x	enoyl-[acyl-carrier-protein] reductase (NADH) (n-C16:1)	h[c] + nadh[c] + t3c9palmeACP[c] -> hdeACP[c] + nad[c]	FabI (Zmob_1448)	Zmob_1448	enoyl-[acyl-carrier protein] reductase I	Fatty acid biosynthesis	0	0	1000	0		1.3.1.9	KEGG
EAR161y	enoyl-[acyl-carrier-protein] reductase (NADPH) (n-C16:1)	h[c] + nadph[c] + t3c9palmeACP[c] -> hdeACP[c] + nadp[c]	FabI (Zmob_1448)	Zmob_1448	enoyl-[acyl-carrier protein] reductase I	Fatty acid biosynthesis	0	0	1000	0		1.3.1.10	KEGG
HXEAH	hexadec-9-enoyl-[acyl-carrier protein]hydrolase	hdeACP[c] + h2o[c] -> hdcea[c] + ACP[c] + h[c]				Fatty acid biosynthesis	0	0	1000	0		3.1.2.14	[7]
3OAS180	3-oxoacyl-[acyl-carrier-protein] synthase (n-C18:0)	h[c] + malACP[c] + palmACP[c] -> 3ooctdACP[c] + ACP[c] + co2[c]	FabF (Zmob_0064)	Zmob_0064	3-oxoacyl-[acyl-carrier-protein] synthase II	Fatty acid biosynthesis	0	0	1000	0		2.3.1.179	BioCyc
3OAR180	3-oxoacyl-[acyl-carrier-protein] reductase (n-C18:0)	3ooctdACP[c] + h[c] + nadph[c] <=> 3hoctaACP[c] + nadp[c]	FabG (Zmob_0112)	Zmob_0112	3-oxoacyl-[acyl-carrier protein] reductase	Fatty acid biosynthesis	1	-1000	1000	0		1.1.1.100	KEGG
3HAD180	3-hydroxyacyl-[acyl-carrier-protein] dehydratase (n-C18:0)	3hoctaACP[c] -> h2o[c] + toctd2eACP[c]	FabZ (Zmob_0181)	Zmob_0181	beta-hydroxyacyl-(ACP) dehydratase FabZ	Fatty acid biosynthesis	0	0	1000	0		4.2.1.59	KEGG
EAR180x	enoyl-[acyl-carrier-protein] reductase (NADH) (n-C18:0)	h[c] + nadh[c] + toctd2eACP[c] -> nad[c] + ocdcaACP[c]	FabI (Zmob_1448)	Zmob_1448	enoyl-[acyl-carrier protein] reductase I	Fatty acid biosynthesis	0	0	1000	0		1.3.1.9	KEGG
EAR180y	enoyl-[acyl-carrier-protein] reductase (NADPH) (n-C18:0)	h[c] + nadph[c] + toctd2eACP[c] -> nadp[c] + ocdcaACP[c]	FabI (Zmob_1448)	Zmob_1448	enoyl-[acyl-carrier protein] reductase I	Fatty acid biosynthesis	0	0	1000	0		1.3.1.10	KEGG
OCACH	Octadecanoyl-[acyl-carrier protein]hydrolase	ocdcaACP[c] + h2o[c] -> ocdca[c] + ACP[c] + h[c]				Fatty acid biosynthesis	0	0	1000	0		3.1.2.14	[7]
3OAS181	3-oxoacyl-[acyl-carrier-protein] synthase (n-C18:1)	h[c] + hdeACP[c] + malACP[c] -> 3ocvac11eACP[c] + ACP[c] + co2[c]	FabF (Zmob_0064)	Zmob_0064	3-oxoacyl-[acyl-carrier-protein] synthase II	Fatty acid biosynthesis	0	0	1000	0		2.3.1.179	BioCyc
3OAR181	3-oxoacyl-[acyl-carrier-protein] reductase (n-C18:1)	3ocvac11eACP[c] + h[c] + nadph[c] -> 3hcvac11eACP[c] + nadp[c]	FabG (Zmob_0112)	Zmob_0112	3-oxoacyl-[acyl-carrier protein] reductase	Fatty acid biosynthesis	0	0	1000	0		1.1.1.100	KEGG
3HAD181	3-hydroxyacyl-[acyl-carrier-protein] dehydratase (n-C18:1)	3hcvac11eACP[c] -> h2o[c] + t3c11vaceACP[c]	FabZ (Zmob_0181)	Zmob_0181	beta-hydroxyacyl-(ACP) dehydratase FabZ	Fatty acid biosynthesis	0	0	1000	0		4.2.1.59	KEGG
EAR181x	enoyl-[acyl-carrier-protein] reductase (NADH) (n-C18:1)	h[c] + nadh[c] + t3c11vaceACP[c] -> nad[c] + octeACP[c]	FabI (Zmob_1448)	Zmob_1448	enoyl-[acyl-carrier protein] reductase I	Fatty acid biosynthesis	0	0	1000	0		1.3.1.9	KEGG
EAR181y	enoyl-[acyl-carrier-protein] reductase (NADPH) (n-C18:1)	h[c] + nadph[c] + t3c11vaceACP[c] -> nadp[c] + octeACP[c]	FabI (Zmob_1448)	Zmob_1448	enoyl-[acyl-carrier protein] reductase I	Fatty acid biosynthesis	0	0	1000	0		1.3.1.10	KEGG
OCEACH	cis-octadec-11-enoyl-[acyl-carrier protein]hydrolase	octeACP[c] + h2o[c] -> ocdcea[c] + ACP[c] + h[c]				Fatty acid biosynthesis	0	0	1000	0		3.1.2.14	[7]
G3PD2	glycerol-3-phosphate dehydrogenase (NADP)	glyc3p[c] + nadp[c] <=> dhap[c] + h[c] + nadph[c]	GpsA (Zmob_1264)	Zmob_1264	glycerol-3-phosphate dehydrogenase	Glycerophospholipid metabolism	1	-1000	1000	0		1.1.1.94	BioCyc
G3PAT120	glycerol-3-phosphate acyltransferase (C12:0)	ddcaACP[c] + glyc3p[c] -> 1ddecg3p[c] + ACP[c]	PlsY (Zmob_0135) or PlsX (Zmob_1270)	Zmob_0135 or Zmob_1270	glycerol-3-phosphate acyltransferase	Glycerophospholipid metabolism	0	0	1000	0		2.3.1.15	KEGG
G3PAT140	glycerol-3-phosphate acyltransferase (C14:0)	glyc3p[c] + myrsACP[c] -> 1tdecg3p[c] + ACP[c]	PlsY (Zmob_0135) or PlsX (Zmob_1270)	Zmob_0135 or Zmob_1271	glycerol-3-phosphate acyltransferase	Glycerophospholipid metabolism	0	0	1000	0		2.3.1.15	KEGG
G3PAT141	glycerol-3-phosphate acyltransferase (C14:1)	glyc3p[c] + tdeACP[c] -> 1tdec7eg3p[c] + ACP[c]	PlsY (Zmob_0135) or PlsX (Zmob_1270)	Zmob_0135 or Zmob_1272	glycerol-3-phosphate acyltransferase	Glycerophospholipid metabolism	0	0	1000	0		2.3.1.15	KEGG
G3PAT160	glycerol-3-phosphate acyltransferase (C16:0)	glyc3p[c] + palmACP[c] -> 1hdecg3p[c] + ACP[c]	PlsY (Zmob_0135) or PlsX (Zmob_1270)	Zmob_0135 or Zmob_1272	glycerol-3-phosphate acyltransferase	Glycerophospholipid metabolism	0	0	1000	0		2.3.1.15	KEGG
G3PAT161	glycerol-3-phosphate acyltransferase (C16:1)	glyc3p[c] + hdeACP[c] -> 1hdec9eg3p[c] + ACP[c]	PlsY (Zmob_0135) or PlsX (Zmob_1270)	Zmob_0135 or Zmob_1272	glycerol-3-phosphate acyltransferase	Glycerophospholipid metabolism	0	0	1000	0		2.3.1.15	KEGG
G3PAT180	glycerol-3-phosphate acyltransferase (C18:0)	glyc3p[c] + ocdcaACP[c] -> 1odecg3p[c] + ACP[c]	PlsY (Zmob_0135) or PlsX (Zmob_1270)	Zmob_0135 or Zmob_1273	glycerol-3-phosphate acyltransferase	Glycerophospholipid metabolism	0	0	1000	0		2.3.1.15	BioCyc
G3PAT181	glycerol-3-phosphate acyltransferase (C18:1)	glyc3p[c] + octeACP[c] -> 1odec11eg3p[c] + ACP[c]	PlsY (Zmob_0135) or PlsX (Zmob_1270)	Zmob_0135 or Zmob_1272	glycerol-3-phosphate acyltransferase	Glycerophospholipid metabolism	0	0	1000	0		2.3.1.15	KEGG
AGPAT120	1-tetradecanoyl-sn-glycerol 3-phosphate O-acyltransferase (n-C12:0)	1ddecg3p[c] + ddcaACP[c] -> ACP[c] + pa120[c]	PlsC (Zmob_0954)	Zmob_0954	1-acyl-sn-glycerol-3-phosphate acyltransferase	Glycerophospholipid metabolism	0	0	1000	0		2.3.1.51	KEGG
AGPAT140	1-tetradecanoyl-sn-glycerol 3-phosphate O-acyltransferase (n-C14:0)	1tdecg3p[c] + myrsACP[c] -> ACP[c] + pa140[c]	PlsC (Zmob_0954)	Zmob_0954	1-acyl-sn-glycerol-3-phosphate acyltransferase	Glycerophospholipid metabolism	0	0	1000	0		2.3.1.51	KEGG
AGPAT141	1-tetradec-7-enoyl-sn-glycerol 3-phosphate O-acyltransferase (n-C14:1)	1tdec7eg3p[c] + tdeACP[c] -> ACP[c] + pa141[c]	PlsC (Zmob_0954)	Zmob_0954	1-acyl-sn-glycerol-3-phosphate acyltransferase	Glycerophospholipid metabolism	0	0	1000	0		2.3.1.51	KEGG
AGPAT160	1-hexadecanoyl-sn-glycerol 3-phosphate O-acyltransferase (n-C16:0)	1hdecg3p[c] + palmACP[c] -> ACP[c] + pa160[c]	PlsC (Zmob_0954)	Zmob_0954	1-acyl-sn-glycerol-3-phosphate acyltransferase	Glycerophospholipid metabolism	0	0	1000	0		2.3.1.51	KEGG
AGPAT161	1-hexadec-7-enoyl-sn-glycerol 3-phosphate O-acyltransferase (n-C16:1)	1hdec9eg3p[c] + hdeACP[c] -> ACP[c] + pa161[c]	PlsC (Zmob_0954)	Zmob_0954	1-acyl-sn-glycerol-3-phosphate acyltransferase	Glycerophospholipid metabolism	0	0	1000	0		2.3.1.51	KEGG
AGPAT180	1-octadecanoyl-sn-glycerol 3-phosphate O-acyltransferase (n-C18:0)	1odecg3p[c] + ocdcaACP[c] -> ACP[c] + pa180[c]	PlsC (Zmob_0954)	Zmob_0954	1-acyl-sn-glycerol-3-phosphate acyltransferase	Glycerophospholipid metabolism	0	0	1000	0		2.3.1.51	KEGG
AGPAT181	1-octadec-7-enoyl-sn-glycerol 3-phosphate O-acyltransferase (n-C18:1)	1odec11eg3p[c] + octeACP[c] -> ACP[c] + pa181[c]	PlsC (Zmob_0954)	Zmob_0954	1-acyl-sn-glycerol-3-phosphate acyltransferase	Glycerophospholipid metabolism	0	0	1000	0		2.3.1.51	KEGG
DASYN120	CDP-diacylglycerol synthetase (n-C12:0)	ctp[c] + h[c] + pa120[c] -> cdpdddecg[c] + ppi[c]	CdsA (Zmob_0176)	Zmob_0176	phosphatidate cytidylyltransferase	Glycerophospholipid metabolism	0	0	1000	0		2.7.7.41	KEGG
DASYN140	CDP-diacylglycerol synthetase (n-C14:0)	ctp[c] + h[c] + pa140[c] -> cdpdtdecg[c] + ppi[c]	CdsA (Zmob_0176)	Zmob_0176	phosphatidate cytidylyltransferase	Glycerophospholipid metabolism	0	0	1000	0		2.7.7.41	KEGG
DASYN141	CDP-diacylglycerol synthetase (n-C14:1)	ctp[c] + h[c] + pa141[c] -> cdpdtdec7eg[c] + ppi[c]	CdsA (Zmob_0176)	Zmob_0176	phosphatidate cytidylyltransferase	Glycerophospholipid metabolism	0	0	1000	0		2.7.7.41	KEGG
DASYN160	CDP-diacylglycerol synthetase (n-C16:0)	ctp[c] + h[c] + pa160[c] -> cdpdhdecg[c] + ppi[c]	CdsA (Zmob_0176)	Zmob_0176	phosphatidate cytidylyltransferase	Glycerophospholipid metabolism	0	0	1000	0		2.7.7.41	KEGG
DASYN161	CDP-diacylglycerol synthetase (n-C16:1)	ctp[c] + h[c] + pa161[c] -> cdpdhdec9eg[c] + ppi[c]	CdsA (Zmob_0176)	Zmob_0176	phosphatidate cytidylyltransferase	Glycerophospholipid metabolism	0	0	1000	0		2.7.7.41	KEGG
DASYN180	CDP-diacylglycerol synthetase (n-C18:0)	ctp[c] + h[c] + pa180[c] -> cdpdodecg[c] + ppi[c]	CdsA (Zmob_0176)	Zmob_0176	phosphatidate cytidylyltransferase	Glycerophospholipid metabolism	0	0	1000	0		2.7.7.41	KEGG
DASYN181	CDP-diacylglycerol synthetase (n-C18:1)	ctp[c] + h[c] + pa181[c] -> cdpdodec11eg[c] + ppi[c]	CdsA (Zmob_0176)	Zmob_0176	phosphatidate cytidylyltransferase	Glycerophospholipid metabolism	0	0	1000	0		2.7.7.41	KEGG
PGSA120	Phosphatidylglycerol synthase (n-C12:0)	cdpdddecg[c] + glyc3p[c] -> cmp[c] + h[c] + pgp120[c]	PgsA (Zmob_0728)	Zmob_0728	CDP-diacylglycerol/glycerol-3-phosphate 3-phosphatidyltransferase	Glycerophospholipid metabolism	0	0	1000	0		2.7.8.5	KEGG
PGSA140	Phosphatidylglycerol synthase (n-C14:0)	cdpdtdecg[c] + glyc3p[c] -> cmp[c] + h[c] + pgp140[c]	PgsA (Zmob_0728)	Zmob_0728	CDP-diacylglycerol/glycerol-3-phosphate 3-phosphatidyltransferase	Glycerophospholipid metabolism	0	0	1000	0		2.7.8.5	KEGG
PGSA141	Phosphatidylglycerol synthase (n-C14:1)	cdpdtdec7eg[c] + glyc3p[c] -> cmp[c] + h[c] + pgp141[c]	PgsA (Zmob_0728)	Zmob_0728	CDP-diacylglycerol/glycerol-3-phosphate 3-phosphatidyltransferase	Glycerophospholipid metabolism	0	0	1000	0		2.7.8.5	KEGG
PGSA160	Phosphatidylglycerol synthase (n-C16:0)	cdpdhdecg[c] + glyc3p[c] -> cmp[c] + h[c] + pgp160[c]	PgsA (Zmob_0728)	Zmob_0728	CDP-diacylglycerol/glycerol-3-phosphate 3-phosphatidyltransferase	Glycerophospholipid metabolism	0	0	1000	0		2.7.8.5	KEGG
PGSA161	Phosphatidylglycerol synthase (n-C16:1)	cdpdhdec9eg[c] + glyc3p[c] -> cmp[c] + h[c] + pgp161[c]	PgsA (Zmob_0728)	Zmob_0728	CDP-diacylglycerol/glycerol-3-phosphate 3-phosphatidyltransferase	Glycerophospholipid metabolism	0	0	1000	0		2.7.8.5	KEGG
PGSA180	Phosphatidylglycerol synthase (n-C18:0)	cdpdodecg[c] + glyc3p[c] -> cmp[c] + h[c] + pgp180[c]	PgsA (Zmob_0728)	Zmob_0728	CDP-diacylglycerol/glycerol-3-phosphate 3-phosphatidyltransferase	Glycerophospholipid metabolism	0	0	1000	0		2.7.8.5	KEGG
PGSA181	Phosphatidylglycerol synthase (n-C18:1)	cdpdodec11eg[c] + glyc3p[c] -> cmp[c] + h[c] + pgp181[c]	PgsA (Zmob_0728)	Zmob_0728	CDP-diacylglycerol/glycerol-3-phosphate 3-phosphatidyltransferase	Glycerophospholipid metabolism	0	0	1000	0		2.7.8.5	KEGG
PSSA120	Phosphatidylserine syntase (n-C12:0)	cdpdddecg[c] + ser-L[c] -> cmp[c] + h[c] + ps120[c]	PssA (Zmob_0168)	Zmob_0168	CDP-diacylglycerol---serine O-phosphatidyltransferase	Glycerophospholipid metabolism	0	0	1000	0		2.7.8.8	KEGG
PSSA140	Phosphatidylserine syntase (n-C14:0)	cdpdtdecg[c] + ser-L[c] -> cmp[c] + h[c] + ps140[c]	PssA (Zmob_0168)	Zmob_0168	CDP-diacylglycerol---serine O-phosphatidyltransferase	Glycerophospholipid metabolism	0	0	1000	0		2.7.8.8	KEGG
PSSA141	Phosphatidylserine syntase (n-C14:1)	cdpdtdec7eg[c] + ser-L[c] -> cmp[c] + h[c] + ps141[c]	PssA (Zmob_0168)	Zmob_0168	CDP-diacylglycerol---serine O-phosphatidyltransferase	Glycerophospholipid metabolism	0	0	1000	0		2.7.8.8	KEGG
PSSA160	Phosphatidylserine syntase (n-C16:0)	cdpdhdecg[c] + ser-L[c] -> cmp[c] + h[c] + ps160[c]	PssA (Zmob_0168)	Zmob_0168	CDP-diacylglycerol---serine O-phosphatidyltransferase	Glycerophospholipid metabolism	0	0	1000	0		2.7.8.8	KEGG
PSSA161	Phosphatidylserine syntase (n-C16:1)	cdpdhdec9eg[c] + ser-L[c] -> cmp[c] + h[c] + ps161[c]	PssA (Zmob_0168)	Zmob_0168	CDP-diacylglycerol---serine O-phosphatidyltransferase	Glycerophospholipid metabolism	0	0	1000	0		2.7.8.8	KEGG
PSSA180	Phosphatidylserine syntase (n-C18:0)	cdpdodecg[c] + ser-L[c] -> cmp[c] + h[c] + ps180[c]	PssA (Zmob_0168)	Zmob_0168	CDP-diacylglycerol---serine O-phosphatidyltransferase	Glycerophospholipid metabolism	0	0	1000	0		2.7.8.8	KEGG
PSSA181	Phosphatidylserine syntase (n-C18:1)	cdpdodec11eg[c] + ser-L[c] -> cmp[c] + h[c] + ps181[c]	PssA (Zmob_0168)	Zmob_0168	CDP-diacylglycerol---serine O-phosphatidyltransferase	Glycerophospholipid metabolism	0	0	1000	0		2.7.8.8	KEGG
CLPNS120pp	cardiolipin synthase (periplasmic, n-C12:0)	2 pg120[c] <=> clpn120[c] + glyc[c]	Cls (Zmob_0865)	Zmob_0865	cardiolipin synthase	Glycerophospholipid metabolism	1	-1000	1000	0		2.7.8.-	KEGG
CLPNS140pp	cardiolipin synthase (periplasmic, n-C14:0)	2 pg140[c] <=> clpn140[c] + glyc[c]	Cls (Zmob_0865)	Zmob_0865	cardiolipin synthase	Glycerophospholipid metabolism	1	-1000	1000	0		2.7.8.-	KEGG
CLPNS141pp	cardiolipin synthase (periplasmic, n-C14:1)	2 pg141[c] <=> clpn141[c] + glyc[c]	Cls (Zmob_0865)	Zmob_0865	cardiolipin synthase	Glycerophospholipid metabolism	1	-1000	1000	0		2.7.8.-	KEGG
CLPNS160pp	cardiolipin synthase (periplasmic, n-C16:0)	2 pg160[c] <=> clpn160[c] + glyc[c]	Cls (Zmob_0865)	Zmob_0865	cardiolipin synthase	Glycerophospholipid metabolism	1	-1000	1000	0		2.7.8.-	KEGG
CLPNS161pp	cardiolipin synthase (periplasmic, n-C16:1)	2 pg161[c] <=> clpn161[c] + glyc[c]	Cls (Zmob_0865)	Zmob_0865	cardiolipin synthase	Glycerophospholipid metabolism	1	-1000	1000	0		2.7.8.-	KEGG
CLPNS180pp	cardiolipin synthase (periplasmic, n-C18:0)	2 pg180[c] <=> clpn180[c] + glyc[c]	Cls (Zmob_0865)	Zmob_0865	cardiolipin synthase	Glycerophospholipid metabolism	1	-1000	1000	0		2.7.8.-	KEGG
CLPNS181pp	cardiolipin synthase (periplasmic, n-C18:1)	2 pg181[c] <=> clpn181[c] + glyc[c]	Cls (Zmob_0865)	Zmob_0865	cardiolipin synthase	Glycerophospholipid metabolism	1	-1000	1000	0		2.7.8.-	KEGG
PGPP120	phosphatidylglycerol phosphate phosphatase (n-C14:0)	h2o[c] + pgp120[c] -> pg120[c] + pi[c]			phosphatidylglycerol phosphate phosphatase	Glycerophospholipid metabolism	0	0	1000	0		3.1.3.27	[7]
PGPP140	phosphatidylglycerol phosphate phosphatase (n-C14:0)	h2o[c] + pgp140[c] -> pg140[c] + pi[c]			phosphatidylglycerol phosphate phosphatase	Glycerophospholipid metabolism	0	0	1000	0		3.1.3.27	[7]
PGPP141	phosphatidylglycerol phosphate phosphatase (n-C14:1)	h2o[c] + pgp141[c] -> pg141[c] + pi[c]			phosphatidylglycerol phosphate phosphatase	Glycerophospholipid metabolism	0	0	1000	0		3.1.3.27	[7]
PGPP160	phosphatidylglycerol phosphate phosphatase (n-C16:0)	h2o[c] + pgp160[c] -> pg160[c] + pi[c]			phosphatidylglycerol phosphate phosphatase	Glycerophospholipid metabolism	0	0	1000	0		3.1.3.27	[7]
PGPP161	phosphatidylglycerol phosphate phosphatase (n-C16:1)	h2o[c] + pgp161[c] -> pg161[c] + pi[c]			phosphatidylglycerol phosphate phosphatase	Glycerophospholipid metabolism	0	0	1000	0		3.1.3.27	[7]
PGPP180	phosphatidylglycerol phosphate phosphatase (n-C18:0)	h2o[c] + pgp180[c] -> pg180[c] + pi[c]			phosphatidylglycerol phosphate phosphatase	Glycerophospholipid metabolism	0	0	1000	0		3.1.3.27	[7]
PGPP181	phosphatidylglycerol phosphate phosphatase (n-C18:1)	h2o[c] + pgp181[c] -> pg181[c] + pi[c]			phosphatidylglycerol phosphate phosphatase	Glycerophospholipid metabolism	0	0	1000	0		3.1.3.27	[7]
PSD120	Phosphatidylserine decarboxylase (n-C12:0)	h[c] + ps120[c] -> co2[c] + pe120[c]	Psd (Zmob_0167)	Zmob_0167	phosphatidylserine decarboxylase	Glycerophospholipid metabolism	0	0	1000	0		4.1.1.65	BioCyc
PSD140	Phosphatidylserine decarboxylase (n-C14:0)	h[c] + ps140[c] -> co2[c] + pe140[c]	Psd (Zmob_0167)	Zmob_0167	phosphatidylserine decarboxylase	Glycerophospholipid metabolism	0	0	1000	0		4.1.1.65	BioCyc
PSD141	Phosphatidylserine decarboxylase (n-C14:1)	h[c] + ps141[c] -> co2[c] + pe141[c]	Psd (Zmob_0167)	Zmob_0167	phosphatidylserine decarboxylase	Glycerophospholipid metabolism	0	0	1000	0		4.1.1.65	BioCyc
PSD160	Phosphatidylserine decarboxylase (n-C16:0)	h[c] + ps160[c] -> co2[c] + pe160[c]	Psd (Zmob_0167)	Zmob_0167	phosphatidylserine decarboxylase	Glycerophospholipid metabolism	0	0	1000	0		4.1.1.65	BioCyc
PSD161	Phosphatidylserine decarboxylase (n-C16:1)	h[c] + ps161[c] -> co2[c] + pe161[c]	Psd (Zmob_0167)	Zmob_0167	phosphatidylserine decarboxylase	Glycerophospholipid metabolism	0	0	1000	0		4.1.1.65	BioCyc
PSD180	Phosphatidylserine decarboxylase (n-C18:0)	h[c] + ps180[c] -> co2[c] + pe180[c]	Psd (Zmob_0167)	Zmob_0167	phosphatidylserine decarboxylase	Glycerophospholipid metabolism	0	0	1000	0		4.1.1.65	BioCyc
PSD181	Phosphatidylserine decarboxylase (n-C18:1)	h[c] + ps181[c] -> co2[c] + pe181[c]	Psd (Zmob_0167)	Zmob_0167	phosphatidylserine decarboxylase	Glycerophospholipid metabolism	0	0	1000	0		4.1.1.65	BioCyc
PEME120	phosphatidylethanolamine N-methyltransferase	pe120[c] + amet[c] -> ahcys[c] + penme120[c] + h[c]				Glycerophospholipid metabolism	0	0	1000	0		2.1.1.17	[8]
PEME140	phosphatidylethanolamine N-methyltransferase	pe140[c] + amet[c] -> ahcys[c] + penme140[c] + h[c]				Glycerophospholipid metabolism	0	0	1000	0		2.1.1.17	[8]
PEME141	phosphatidylethanolamine N-methyltransferase	pe141[c] + amet[c] -> ahcys[c] + penme141[c] + h[c]				Glycerophospholipid metabolism	0	0	1000	0		2.1.1.17	[8]
PEME160	phosphatidylethanolamine N-methyltransferase	pe160[c] + amet[c] -> ahcys[c] + penme160[c] + h[c]				Glycerophospholipid metabolism	0	0	1000	0		2.1.1.17	[8]
PEME161	phosphatidylethanolamine N-methyltransferase	pe161[c] + amet[c] -> ahcys[c] + penme161[c] + h[c]				Glycerophospholipid metabolism	0	0	1000	0		2.1.1.17	[8]
PEME180	phosphatidylethanolamine N-methyltransferase	pe180[c] + amet[c] -> ahcys[c] + penme180[c] + h[c]				Glycerophospholipid metabolism	0	0	1000	0		2.1.1.17	[8]
PEME181	phosphatidylethanolamine N-methyltransferase	pe181[c] + amet[c] -> ahcys[c] + penme181[c] + h[c]				Glycerophospholipid metabolism	0	0	1000	0		2.1.1.17	[8]
PEDM120	phosphatidyl-N-methylethanolamine N-methyltransferase	penme120[c] + amet[c] -> ahcys[c] + pendme120[c] + h[c]				Glycerophospholipid metabolism	0	0	1000	0		2.1.1.71	[8]
PEDM140	phosphatidyl-N-methylethanolamine N-methyltransferase	penme140[c] + amet[c] -> ahcys[c] + pendme140[c] + h[c]				Glycerophospholipid metabolism	0	0	1000	0		2.1.1.71	[8]
PEDM141	phosphatidyl-N-methylethanolamine N-methyltransferase	penme141[c] + amet[c] -> ahcys[c] + pendme141[c] + h[c]				Glycerophospholipid metabolism	0	0	1000	0		2.1.1.71	[8]
PEDM160	phosphatidyl-N-methylethanolamine N-methyltransferase	penme160[c] + amet[c] -> ahcys[c] + pendme160[c] + h[c]				Glycerophospholipid metabolism	0	0	1000	0		2.1.1.71	[8]
PEDM161	phosphatidyl-N-methylethanolamine N-methyltransferase	penme161[c] + amet[c] -> ahcys[c] + pendme161[c] + h[c]				Glycerophospholipid metabolism	0	0	1000	0		2.1.1.71	[8]
PEDM180	phosphatidyl-N-methylethanolamine N-methyltransferase	penme180[c] + amet[c] -> ahcys[c] + pendme180[c] + h[c]				Glycerophospholipid metabolism	0	0	1000	0		2.1.1.71	[8]
PEDM181	phosphatidyl-N-methylethanolamine N-methyltransferase	penme181[c] + amet[c] -> ahcys[c] + pendme181[c] + h[c]				Glycerophospholipid metabolism	0	0	1000	0		2.1.1.71	[8]
PCSA120	phosphatidylethanolamine N-methyltransferase	pendme120[c] + amet[c] -> ahcys[c] + pc120[c] + h[c]				Glycerophospholipid metabolism	0	0	1000	0		2.1.1.71	[8]
PCSA140	phosphatidylethanolamine N-methyltransferase	pendme140[c] + amet[c] -> ahcys[c] + pc140[c] + h[c]				Glycerophospholipid metabolism	0	0	1000	0		2.1.1.71	[8]
PCSA141	phosphatidylethanolamine N-methyltransferase	pendme141[c] + amet[c] -> ahcys[c] + pc141[c] + h[c]				Glycerophospholipid metabolism	0	0	1000	0		2.1.1.71	[8]
PCSA160	phosphatidylethanolamine N-methyltransferase	pendme160[c] + amet[c] -> ahcys[c] + pc160[c] + h[c]				Glycerophospholipid metabolism	0	0	1000	0		2.1.1.71	[8]
PCSA161	phosphatidylethanolamine N-methyltransferase	pendme161[c] + amet[c] -> ahcys[c] + pc161[c] + h[c]				Glycerophospholipid metabolism	0	0	1000	0		2.1.1.71	[8]
PCSA180	phosphatidylethanolamine N-methyltransferase	pendme180[c] + amet[c] -> ahcys[c] + pc180[c] + h[c]				Glycerophospholipid metabolism	0	0	1000	0		2.1.1.71	[8]
PCSA181	phosphatidylethanolamine N-methyltransferase	pendme181[c] + amet[c] -> ahcys[c] + pc181[c] + h[c]				Glycerophospholipid metabolism	0	0	1000	0		2.1.1.71	[8]
PLIPA2E120pp	Phospholipase A2 (phosphatidylethanolamine, n-C12:0) (periplasm)	h2o[c] + pe120[c] -> 1agpe120[c] + ddca[c] + h[c]				Glycerophospholipid metabolism	0	0	1000	0		3.1.1.4	[8]
PLIPA2E140pp	Phospholipase A2 (phosphatidylethanolamine, n-C14:0) (periplasm)	h2o[c] + pe140[c] -> 1agpe140[c] + h[c] + ttdca[c]				Glycerophospholipid metabolism	0	0	1000	0		3.1.1.4	[8]
PLIPA2E141pp	Phospholipase A2 (phosphatidylethanolamine, n-C14:1) (periplasm)	h2o[c] + pe141[c] -> 1agpe141[c] + h[c] + ttdcea[c]				Glycerophospholipid metabolism	0	0	1000	0		3.1.1.4	[8]
PLIPA2E160pp	Phospholipase A2 (phosphatidylethanolamine, n-C16:0) (periplasm)	h2o[c] + pe160[c] -> 1agpe160[c] + h[c] + hdca[c]				Glycerophospholipid metabolism	0	0	1000	0		3.1.1.4	[8]
PLIPA2E161pp	Phospholipase A2 (phosphatidylethanolamine, n-C16:1) (periplasm)	h2o[c] + pe161[c] -> 1agpe161[c] + h[c] + hdcea[c]				Glycerophospholipid metabolism	0	0	1000	0		3.1.1.4	[8]
PLIPA2E180pp	Phospholipase A2 (phosphatidylethanolamine, n-C18:0) (periplasm)	h2o[c] + pe180[c] -> 1agpe180[c] + h[c] + ocdca[c]				Glycerophospholipid metabolism	0	0	1000	0		3.1.1.4	[8]
PLIPA2E181pp	Phospholipase A2 (phosphatidylethanolamine, n-C18:1) (periplasm)	h2o[c] + pe181[c] -> 1agpe181[c] + h[c] + ocdcea[c]				Glycerophospholipid metabolism	0	0	1000	0		3.1.1.4	[8]
GPDDA1	Glycerophosphodiester phosphodiesterase (Glycerophosphocholine)	g3pc[c] + h2o[c] -> chol[c] + glyc3p[c] + h[c]	UgpQ (Zmob_0668)	Zmob_0668	glycerophosphoryl diester phosphodiesterase	Glycerophospholipid metabolism	0	0	1000	0		3.1.4.46	KEGG
GPDDA2	Glycerophosphodiester phosphodiesterase (Glycerophosphoethanolamine)	g3pe[c] + h2o[c] -> etha[c] + glyc3p[c] + h[c]	UgpQ (Zmob_0668)	Zmob_0668	glycerophosphoryl diester phosphodiesterase	Glycerophospholipid metabolism	0	0	1000	0		3.1.4.46	KEGG
GPDDA4	Glycerophosphodiester phosphodiesterase (Glycerophosphoglycerol)	g3pg[c] + h2o[c] -> glyc[c] + glyc3p[c] + h[c]	UgpQ (Zmob_0668)	Zmob_0668	glycerophosphoryl diester phosphodiesterase	Glycerophospholipid metabolism	0	0	1000	0		3.1.4.46	KEGG
ADPRDP	ADPribose diphosphatase	adprib[c] + h2o[c] -> amp[c] + 2 h[c] + r5p[c]	NudF (Zmob_0275)	Zmob_0275	ADP-ribose pyrophosphatase	Purine metabolism	0	0	1000	0		3.6.1.13	KEGG
GLUPRT	glutamine phosphoribosyldiphosphate amidotransferase	gln-L[c] + h2o[c] + prpp[c] -> glu-L[c] + ppi[c] + pram[c]	PurF (Zmob_1574)	Zmob_1574	amidophosphoribosyltransferase	Purine metabolism	0	0	1000	0		2.4.2.14	KEGG
PRAGSr	phosphoribosylglycinamide synthase	atp[c] + gly[c] + pram[c] <=> adp[c] + gar[c] + h[c] + pi[c]	PurD (Zmob_0853)	Zmob_0853	phosphoribosylamine--glycine ligase	Purine metabolism	1	-1000	1000	0		6.3.4.13	KEGG
GARFT	phosphoribosylglycinamide formyltransferase	10fthf[c] + gar[c] <=> fgam[c] + h[c] + thf[c]	PurN (Zmob_0577)	Zmob_0577	phosphoribosylglycinamide formyltransferase 1	Purine metabolism	1	-1000	1000	0		2.1.2.2	KEGG
PRFGS	phosphoribosylformylglycinamidine synthase	atp[c] + fgam[c] + gln-L[c] + h2o[c] -> adp[c] + fpram[c] + glu-L[c] + h[c] + pi[c]	PurL (Zmob_0474) and PurL (Zmob_1593) and PurL (Zmob_1594)	Zmob_0474 and Zmob_1593 and Zmob_1594	phosphoribosylformylglycinamidine synthase	Purine metabolism	0	0	1000	0		6.3.5.3	KEGG
PRAIS	phosphoribosylaminoimidazole synthase	atp[c] + fpram[c] -> adp[c] + air[c] + 2 h[c] + pi[c]	PurM (Zmob_0576)	Zmob_0576	phosphoribosylformylglycinamidine cyclo-ligase	Purine metabolism	0	0	1000	0		6.3.3.1	KEGG
AIRC2	phosphoribosylaminoimidazole carboxylase	air[c] + atp[c] + hco3[c] -> 5caiz[c] + adp[c] + h[c] + pi[c]	PurK (Zmob_1687)	Zmob_1687	5-(carboxyamino)imidazole ribonucleotide synthase	Purine metabolism	0	0	1000	0		6.3.4.18	KEGG
AIRC3	phosphoribosylaminoimidazole carboxylase (mutase rxn)	5aizc[c] <=> 5caiz[c]	PurE (Zmob_1688)	Zmob_1688	5-(carboxyamino)imidazole ribonucleotide mutase	Purine metabolism	1	-1000	1000	0		5.4.99.18	KEGG
PRASCSi	phosphoribosylaminoimidazolesuccinocarboxamide synthase	5aizc[c] + asp-L[c] + atp[c] -> 25aics[c] + adp[c] + h[c] + pi[c]	PurC (Zmob_0266)	Zmob_0266	phosphoribosylaminoimidazole succinocarboxamide synthase	Purine metabolism	0	0	1000	0		6.3.2.6	KEGG
ADSL2r	adenylosuccinate lyase	25aics[c] <=> aicar[c] + fum[c]	PurB (Zmob_0618)	Zmob_0618	adenylosuccinate lyase	Purine metabolism	1	-1000	1000	0		4.3.2.2	KEGG
AICART	phosphoribosylaminoimidazolecarboxamide formyltransferase	10fthf[c] + aicar[c] <=> fprica[c] + thf[c]	PurH (Zmob_0776)	Zmob_0776	phosphoribosylaminoimidazolecarboxamide formyltransferase	Purine metabolism	1	-1000	1000	0		2.1.2.3	KEGG
IMPC	IMP cyclohydrolase	h2o[c] + imp[c] <=> fprica[c]	PurH (Zmob_0776)	Zmob_0776	IMP cyclohydrolase	Purine metabolism	1	-1000	1000	0		2.1.2.3	KEGG
ADK3	adentylate kinase (GTP)	amp[c] + gtp[c] <=> adp[c] + gdp[c]	Adk (Zmob_1065)	Zmob_1065	adenylate kinase	Purine metabolism	1	-1000	1000	0		2.7.4.3	[7]
ADK4	adentylate kinase (ITP)	amp[c] + itp[c] <=> adp[c] + idp[c]	Adk (Zmob_1065)	Zmob_1065	adenylate kinase	Purine metabolism	1	-1000	1000	0		2.7.4.3	[7]
NTPP10	Nucleoside triphosphate pyrophosphorylase (ditp)	ditp[c] + h2o[c] -> dimp[c] + h[c] + ppi[c]	RdgB (Zmob_1185) or RdgB (Zmob_1771)	Zmob_1185 or Zmob_1771	dITP/XTP pyrophosphatase	Purine metabolism	0	0	1000	0		3.6.1.19	KEGG
NTD12	5'-nucleotidase (dIMP)	dimp[c] + h2o[c] -> din[c] + pi[c]	SurE (Zmob_0322)	Zmob_0322	5'-nucleotidase	Purine metabolism	0	0	1000	0		3.1.3.5	[7]
NTPP9	Nucleoside triphosphate pyrophosphorylase (itp)	h2o[c] + itp[c] -> h[c] + imp[c] + ppi[c]	RdgB (Zmob_1185) or RdgB (Zmob_1771)	Zmob_1185 or Zmob_1771	dITP/XTP pyrophosphatase	Purine metabolism	0	0	1000	0		3.6.1.19	KEGG
ADSS	adenylosuccinate synthase	asp-L[c] + gtp[c] + imp[c] -> dcamp[c] + gdp[c] + 2 h[c] + pi[c]	PurA (Zmob_1453)	Zmob_1453	adenylosuccinate synthase	Purine metabolism	0	0	1000	0		6.3.4.4	KEGG
ADSL1r	adenylsuccinate lyase	dcamp[c] <=> amp[c] + fum[c]	PurB (Zmob_0618)	Zmob_0618	adenylosuccinate lyase	Purine metabolism	1	-1000	1000	0		4.3.2.2	KEGG
NTPP6	Nucleoside triphosphate pyrophosphorylase (atp)	atp[c] + h2o[c] -> amp[c] + h[c] + ppi[c]	MazG (Zmob_0225)	Zmob_0225	ATP diphosphatase	Purine metabolism	0	0	1000	0		3.6.1.8	KEGG
NTPP5	Nucleoside triphosphate pyrophosphorylase (datp)	datp[c] + h2o[c] -> damp[c] + h[c] + ppi[c]	MazG (Zmob_0225)	Zmob_0225	ATP diphosphatase	Purine metabolism	0	0	1000	0		3.6.1.8	KEGG
NTPP7	Nucleoside triphosphate pyrophosphorylase (dttp)	dttp[c] + h2o[c] -> dtmp[c] + h[c] + ppi[c]	MazG (Zmob_0225)	Zmob_0225	ATP diphosphatase	Purine metabolism	0	0	1000	0		3.6.1.8	KEGG
NTD7	5'-nucleotidase (AMP)	amp[c] + h2o[c] -> adn[c] + pi[c]	SurE (Zmob_0322)	Zmob_0322	5'-nucleotidase	Purine metabolism	0	0	1000	0		3.1.3.5	KEGG
ADA	Adenosine deaminase	adn[c] + h[c] + h2o[c] -> ins[c] + nh4[c]	Add (Zmob_0335 and Zmob_1171 and Zmob_1770)	Zmob_0335 and Zmob_1171 and Zmob_1770	adenosine deaminase	Purine metabolism	0	0	1000	0		3.5.4.4	KEGG
ADNK1	adenosine kinase	adn[c] + atp[c] -> adp[c] + amp[c] + h[c]	Adk (Zmob_1065)	Zmob_1065	adenosine kinase	Purine metabolism	0	0	1000	0		2.7.1.20	[7]
DADK	deoxyadenylate kinase	atp[c] + damp[c] <=> adp[c] + dadp[c]	Adk (Zmob_1065)	Zmob_1065	adenosine kinase	Purine metabolism	1	-1000	1000	0		2.7.4.11	[7]
NTD11	5'-nucleotidase (IMP)	h2o[c] + imp[c] -> ins[c] + pi[c]	SurE (Zmob_0322)	Zmob_0322	5'-nucleotidase	Purine metabolism	0	0	1000	0		3.1.3.5	KEGG
ADK1	adenylate kinase	amp[c] + atp[c] <=> 2 adp[c]	Adk (Zmob_1065)	Zmob_1065	adenylate kinase	Purine metabolism	1	-1000	1000	0		2.7.4.3	KEGG
RNDR1	ribonucleoside-diphosphate reductase (ADP)	adp[c] + trdrd[c] -> dadp[c] + h2o[c] + trdox[c]	NrdA (Zmob_0277) and NrdB (Zmob_0977)	Zmob_0277 and Zmob_0977	ribonucleoside-diphosphate reductase	Purine metabolism	0	0	1000	0		1.17.4.1	KEGG
RNTR1c2	ribonucleoside-triphosphate reductase (ATP) (flavodoxin)	atp[c] + trdrd[c] -> datp[c] + trdox[c] + h2o[c]	NrdD (Zmob_0286)	Zmob_0286	ribonucleoside-triphosphate reductase	Purine metabolism	0	0	1000	0		1.17.4.2	KEGG
PYK1	pyruvate kinase	dadp[c] + h[c] + pep[c] -> datp[c] + pyr[c]	Pyk (Zmob_0682)	Zmob_0682	pyruvate kinase	Purine metabolism	0	0	1000	0		2.7.1.40	KEGG
NTD6	5'-nucleotidase (dAMP)	damp[c] + h2o[c] -> dad-2[c] + pi[c]	SurE (Zmob_0322)	Zmob_0322	5'-nucleotidase	Purine metabolism	0	0	1000	0		3.1.3.5	KEGG
DADA	Deoxyadenosine deaminase	dad-2[c] + h[c] + h2o[c] -> din[c] + nh4[c]	Add (Zmob_0335 and Zmob_1171 and Zmob_1770)	Zmob_0335 and Zmob_1171 and Zmob_1770	adenosine deaminase	Purine metabolism	0	0	1000	0		3.5.4.4	KEGG
IMPD	IMP dehydrogenase	h2o[c] + imp[c] + nad[c] -> h[c] + nadh[c] + xmp[c]	GuaB (Zmob_0029)	Zmob_0029	IMP dehydrogenase	Purine metabolism	0	0	1000	0		1.1.1.205	KEGG
NTD10	5'-nucleotidase (XMP)	h2o[c] + xmp[c] -> pi[c] + xtsn[c]	SurE (Zmob_0322)	Zmob_0322	5'-nucleotidase	Purine metabolism	0	0	1000	0		3.1.3.5	KEGG
NTPP11	Nucleoside triphosphate pyrophosphorylase (xtp)	h2o[c] + xtp[c] -> h[c] + ppi[c] + xmp[c]	RdgB (Zmob_1185) or RdgB (Zmob_1771)	Zmob_1185 or Zmob_1771	dITP/XTP pyrophosphatase	Purine metabolism	0	0	1000	0		3.6.1.19	KEGG
GTPHs	GTP amine hydrolysis (spontaneous)	gtp[c] + h[c] + h2o[c] -> nh4[c] + xtp[c]	SPONTANEOUS (s0001)	s0001	SPONTANEOUS	Purine metabolism	0	0	1000	0			KEGG
GMPS2	GMP synthase	atp[c] + gln-L[c] + h2o[c] + xmp[c] -> amp[c] + glu-L[c] + gmp[c] + 2 h[c] + ppi[c]	GuaA (Zmob_0076)	Zmob_0076 or Zmob_1302	GMP synthase (glutamine-hydrolysing)	Purine metabolism	0	0	1000	0		6.3.5.2	KEGG
NTD9	5'-nucleotidase (GMP)	gmp[c] + h2o[c] -> gsn[c] + pi[c]	SurE (Zmob_0322)	Zmob_0322	5'-nucleotidase	Purine metabolism	0	0	1000	0		3.1.3.5	KEGG
GK1	guanylate kinase (GMP:ATP)	atp[c] + gmp[c] <=> adp[c] + gdp[c]	Gmk (Zmob_0968)	Zmob_0968	guanylate kinase	Purine metabolism	1	-1000	1000	0		2.7.4.8	KEGG
PYK2	pyruvate kinase	gdp[c] + h[c] + pep[c] -> gtp[c] + pyr[c]	Pyk (Zmob_0682)	Zmob_0682	pyruvate kinase	Purine metabolism	0	0	1000	0		2.7.1.40	KEGG
NTPP2	Nucleoside triphosphate pyrophosphorylase (gtp)	gtp[c] + h2o[c] -> gmp[c] + h[c] + ppi[c]	MazG (Zmob_0225) or RdgB (Zmob_1185 and Zmob_1771)	Zmob_1185 and Zmob_1771 or Zmob_0225	ATP diphosphatase and dITP/XTP pyrophosphatase	Purine metabolism	0	0	1000	0		3.6.1.8 or 3.6.1.19	KEGG
GTPDPK	GTP diphosphokinase	atp[c] + gtp[c] -> amp[c] + gdptp[c] + h[c]	RelA (Zmob_0736)	Zmob_0736	GTP pyrophosphokinase	Purine metabolism	0	0	1000	0		2.7.6.5	KEGG
PPGPPDP	guanosine-3',5'-bis(diphosphate) 3'-diphosphatase	h2o[c] + ppgpp[c] -> gdp[c] + ppi[c]	SpoT (Zmob_0736)	Zmob_0736	guanosine-3',5'-bis(diphosphate) 3'-diphosphatase	Purine metabolism	0	0	1000	0	2	3.1.7.2	KEGG
GTPDPDP	guanosine-5'-triphosphate,3'-diphosphate diphosphatase	gdptp[c] + h2o[c] -> h[c] + pi[c] + ppgpp[c]	GppA (Zmob_0572 or Zmob_0940)	Zmob_0572 or Zmob_0940	exopolyphosphatase / guanosine-5'-triphosphate,3'-diphosphate pyrophosphatase	Purine metabolism	0	0	1000	0		3.6.1.11 or 3.6.1.40	KEGG
RNDR2	ribonucleoside-diphosphate reductase (GDP)	gdp[c] + trdrd[c] -> dgdp[c] + h2o[c] + trdox[c]	NrdA (Zmob_0277) and NrdB (Zmob_0977)	Zmob_0277 and Zmob_0977	ribonucleoside-diphosphate reductase	Purine metabolism	0	0	1000	0		1.17.4.1	KEGG
RNTR2c2	ribonucleoside-triphosphate reductase (GTP) (flavodoxin)	gtp[c] + trdrd[c] -> dgtp[c] + trdox[c] + h2o[c]	NrdD (Zmob_0286)	Zmob_0286	ribonucleoside-triphosphate reductase	Purine metabolism	0	0	1000	0		1.17.4.2	KEGG
DGK1	deoxyguanylate kinase (dGMP:ATP)	atp[c] + dgmp[c] <=> adp[c] + dgdp[c]	Gmk (Zmob_0968)	Zmob_0968	guanylate kinase	Purine metabolism	1	-1000	1000	0		2.7.4.8	KEGG
NTD8	5'-nucleotidase (dGMP)	dgmp[c] + h2o[c] -> dgsn[c] + pi[c]	SurE (Zmob_0322)	Zmob_0322	5'-nucleotidase	Purine metabolism	0	0	1000	0		3.1.3.5	KEGG
NTPTP1	Nucleoside triphosphate tripolyhydrolase	dgtp[c] + h2o[c] -> dgsn[c] + pppi[c]	Dgt (Zmob_0454 or Zmob_1634)	Zmob_0454 or Zmob_1634	deoxyguanosinetriphosphate triphosphohydrolase	Purine metabolism	0	0	1000	0		3.1.5.1	KEGG
NTPP1	Nucleoside triphosphate pyrophosphorylase (dgtp)	dgtp[c] + h2o[c] -> dgmp[c] + h[c] + ppi[c]	RdgB (Zmob_1185) or RdgB (Zmob_1771)	Zmob_1185 or Zmob_1771	dITP/XTP pyrophosphatase	Purine metabolism	0	0	1000	0		3.6.1.19	KEGG
PYK3	pyruvate kinase	dgdp[c] + h[c] + pep[c] -> dgtp[c] + pyr[c]	Pyk (Zmob_0682)	Zmob_0682	pyruvate kinase	Purine metabolism	0	0	1000	0		2.7.1.40	KEGG
GUAD	guanine deaminase	gua[c] + h[c] + h2o[c] -> nh4[c] + xan[c]	GuaD (Zmob_0364)	Zmob_0364	guanine deaminase	Purine metabolism	0	0	1000	0		3.5.4.3	KEGG
ADPT	adenine phosphoribosyltransferase	ade[c] + prpp[c] -> amp[c] + ppi[c]				Purine metabolism	0	0	1000	0		2.4.2.7	BioCyc
NTP1	nucleoside-triphosphatase (ATP)	atp[c] + h2o[c] -> adp[c] + h[c] + pi[c]	ParA (Zmob_0880)	Zmob_0880	nucleoside-triphosphatase	Purine metabolism	0	0	0	0		3.6.1.15	BioCyc
NTP3	nucleoside-triphosphatase (GTP)	gtp[c] + h2o[c] -> gdp[c] + h[c] + pi[c]	EngA (Zmob_0985)	Zmob_0985	nucleoside-triphosphatase	Purine metabolism	0	0	1000	0		3.6.1.15	BioCyc
NTP5	nucleoside-triphosphatase (CTP)	ctp[c] + h2o[c] -> cdp[c] + h[c] + pi[c]			nucleoside-triphosphatase	Purine metabolism	0	0	1000	0		3.6.1.15	BioCyc
NTP10	nucleoside-triphosphatase (ITP)	h2o[c] + itp[c] -> h[c] + idp[c] + pi[c]			nucleoside-triphosphatase	Purine metabolism	0	0	1000	0		3.6.1.15	BioCyc
ATPHs	ATP amine hydrolysis (spontaneous)	atp[c] + h[c] + h2o[c] -> itp[c] + nh4[c]	SPONTANEOUS (s0001)	s0001	SPONTANEOUS	Purine metabolism	0	0	1000	0			KEGG
DATPHs	dATP amine hydrolysis (spontaneous)	datp[c] + h[c] + h2o[c] -> ditp[c] + nh4[c]	SPONTANEOUS (s0001)	s0001	dATP amine hydrolysis	SPONTANEOUS	0	0	1000	0			KEGG
CBPS	carbamoyl-phosphate synthase (glutamine-hydrolysing)	2 atp[c] + gln-L[c] + h2o[c] + hco3[c] -> 2 adp[c] + cbp[c] + glu-L[c] + 2 h[c] + pi[c]	Car ( Zmob_1522 and Zmob_1521 )	Zmob_1522 and Zmob_1521	carbamoyl-phosphate synthase	Pyrimidine metabolism	0	0	1000	0		6.3.5.5	KEGG
ASPCT	aspartate carbamoyltransferase	asp-L[c] + cbp[c] -> cbasp[c] + h[c] + pi[c]	PyrB (Zmob_0499)	Zmob_0499	aspartate carbamoyltransferase	Pyrimidine metabolism	0	0	1000	0		2.1.3.2	KEGG
DHORTS	dihydroorotase	dhor-S[c] + h2o[c] <=> cbasp[c] + h[c]	PyrC (Zmob_0498 and Zmob_1451)	Zmob_0498 and Zmob_1451	dihydroorotase	Pyrimidine metabolism	1	-1000	1000	0		3.5.2.3	KEGG
DHORD2	dihydoorotic acid dehydrogenase (quinone8)	dhor-S[c] + q10[c] -> orot[c] + q10h2[c]	PyrD (Zmob_0709)	Zmob_0709	dihydroorotate oxidase	Pyrimidine metabolism	0	0	1000	0		1.3.5.2	KEGG
ORPT	orotate phosphoribosyltransferase	orot5p[c] + ppi[c] <=> orot[c] + prpp[c]	PyrE (Zmob_1433)	Zmob_1433	orotate phosphoribosyltransferase	Pyrimidine metabolism	1	-1000	1000	0		2.4.2.10	KEGG
OMPDC	orotidine-5'-phosphate decarboxylase	h[c] + orot5p[c] -> co2[c] + ump[c]	PyrF (Zmob_1112)	Zmob_1112	orotidine-5'-phosphate decarboxylase	Pyrimidine metabolism	0	0	1000	0		4.1.1.23	KEGG
UMPK	UMP kinase	atp[c] + ump[c] <=> adp[c] + udp[c]	Cmk (Zmob_1355) or PyrH (Zmob_0173)	Zmob_1355 or Zmob_0173	cytidylate kinase or uridylate kinase	Pyrimidine metabolism	1	-1000	1000	0		2.7.4.14	KEGG
NTPP8	Nucleoside triphosphate pyrophosphorylase (utp)	h2o[c] + utp[c] -> h[c] + ppi[c] + ump[c]	RdgB (Zmob_1185) or RdgB (Zmob_1771)	Zmob_1185 or Zmob_1771	ATP diphosphatase	Pyrimidine metabolism	0	0	1000	0		3.6.1.19	KEGG
NTD2	5'-nucleotidase (UMP)	h2o[c] + ump[c] -> pi[c] + uri[c]	SurE (Zmob_0322)	Zmob_0322	5'-nucleotidase	Pyrimidine metabolism	0	0	1000	0		3.1.3.5	KEGG
CYTD	cytidine deaminase	cytd[c] + h[c] + h2o[c] -> nh4[c] + uri[c]	Cdd (Zmob_0433)	Zmob_0433	cytidine deaminase	Pyrimidine metabolism	0	0	1000	0		3.5.4.5	KEGG
NTD4	5'-nucleotidase (CMP)	cmp[c] + h2o[c] -> cytd[c] + pi[c]	SurE (Zmob_0322)	Zmob_0322	5'-nucleotidase	Pyrimidine metabolism	0	0	1000	0		3.1.3.5	KEGG
NTPP4	Nucleoside triphosphate pyrophosphorylase (ctp)	ctp[c] + h2o[c] -> cmp[c] + h[c] + ppi[c]	MazG (Zmob_0225)	Zmob_0225	ATP diphosphatase	Pyrimidine metabolism	0	0	1000	0		3.6.1.8	KEGG
CYTK1	cytidylate kinase (CMP)	atp[c] + cmp[c] <=> adp[c] + cdp[c]	Cmk (Zmob_1355)	Zmob_1355	cytidylate kinase	Pyrimidine metabolism	1	-1000	1000	0		2.7.4.14	KEGG
CTPS2	CTP synthase (glutamine)	atp[c] + gln-L[c] + h2o[c] + utp[c] -> adp[c] + ctp[c] + glu-L[c] + 2 h[c] + pi[c]	PyrG (Zmob_0992)	Zmob_0992	CTP synthase	Pyrimidine metabolism	0	0	1000	0		6.3.4.2	KEGG
TRDR	thioredoxin reductase (NADPH)	h[c] + nadph[c] + trdox[c] -> nadp[c] + trdrd[c]	TrxB (Zmob_0185)	Zmob_0185	thioredoxin reductase	Pyrimidine metabolism	0	0	1000	0		1.8.1.9	KEGG
RNDR3	ribonucleoside-diphosphate reductase (CDP)	cdp[c] + trdrd[c] -> dcdp[c] + h2o[c] + trdox[c]	NrdA (Zmob_0277) and NrdB (Zmob_0977)	Zmob_0277 and Zmob_0977	ribonucleoside-diphosphate reductase	Pyrimidine metabolism	0	0	1000	0		1.17.4.1	KEGG
RNTR3c2	ribonucleoside-triphosphate reductase (CTP) (flavodoxin)	ctp[c] + trdrd[c] -> dctp[c] + trdox[c] + h2o[c]	NrdD (Zmob_0286)	Zmob_0286	ribonucleoside-triphosphate reductase	Pyrimidine metabolism	0	0	1000	0		1.17.4.2	KEGG
RNTR4c2	ribonucleoside-triphosphate reductase (UTP) (flavodoxin)	utp[c] + trdrd[c] -> dutp[c] + trdox[c] + h2o[c]	NrdD (Zmob_0286)	Zmob_0286	ribonucleoside-triphosphate reductase	Pyrimidine metabolism	0	0	1000	0		1.17.4.2	KEGG
CYTK2	cytidylate kinase (dCMP)	atp[c] + dcmp[c] <=> adp[c] + dcdp[c]	Cmk (Zmob_1355)	Zmob_1355	cytidylate kinase	Pyrimidine metabolism	1	-1000	1000	0		2.7.4.14	KEGG
NTPP3	Nucleoside triphosphate pyrophosphorylase (dctp)	dctp[c] + h2o[c] -> dcmp[c] + h[c] + ppi[c]	MazG (Zmob_0225)	Zmob_0225	ATP diphosphatase	Pyrimidine metabolism	0	0	1000	0		3.6.1.8	[7]
NTD3	5'-nucleotidase (dCMP)	dcmp[c] + h2o[c] -> dcyt[c] + pi[c]	SurE (Zmob_0322)	Zmob_0322	5'-nucleotidase	Pyrimidine metabolism	0	0	1000	0		3.1.3.5	KEGG
DCYTD	deoxycytidine deaminase	dcyt[c] + h[c] + h2o[c] -> duri[c] + nh4[c]	Cdd (Zmob_0433)	Zmob_0433	cytidine deaminase	Pyrimidine metabolism	0	0	1000	0		3.5.4.5	KEGG
DURIK1	deoxyuridine kinase (ATP:Deoxyuridine)	atp[c] + duri[c] -> adp[c] + dump[c] + h[c]	Tdk (Zmob_1079)	Zmob_1079	thymidine kinase	Pyrimidine metabolism	0	0	1000	0		2.7.1.21	KEGG
NTD1	5'-nucleotidase (dUMP)	dump[c] + h2o[c] -> duri[c] + pi[c]	SurE (Zmob_0322)	Zmob_0322	5'-nucleotidase	Pyrimidine metabolism	0	0	1000	0		3.1.3.5	[7]
DUMPK	dUMP kinase	atp[c] + dump[c] <=> adp[c] + dudp[c]	Tmk (Zmob_0230)	Zmob_0230	dTMP kinase	Pyrimidine metabolism	1	-1000	1000	0		2.7.4.9	KEGG
DUTPDP	dUTP diphosphatase	dutp[c] + h2o[c] -> dump[c] + h[c] + ppi[c]	Dut (Zmob_0139)	Zmob_0139	dUTP pyrophosphatase	Pyrimidine metabolism	0	0	1000	0		3.6.1.23	KEGG
DCTPD	dCTP deaminase	dctp[c] + h[c] + h2o[c] -> dutp[c] + nh4[c]	Dcd (Zmob_0434)	Zmob_0434	dCTP deaminase	Pyrimidine metabolism	0	0	1000	0		3.5.4.13	KEGG
TMDS	thymidylate synthase	dump[c] + mlthf[c] -> dhf[c] + dtmp[c]	ThyA (Zmob_1389)	Zmob_1389	thymidylate synthase	Pyrimidine metabolism	0	0	1000	0		2.1.1.45	KEGG
TMDK1	thymidine kinase (ATP:thymidine)	atp[c] + thymd[c] -> adp[c] + dtmp[c] + h[c]	Tdk (Zmob_1079)	Zmob_1079	thymidine kinase	Pyrimidine metabolism	0	0	1000	0		2.7.1.21	KEGG
NTD5	5'-nucleotidase (dTMP)	dtmp[c] + h2o[c] -> pi[c] + thymd[c]	SurE (Zmob_0322)	Zmob_0322	5'-nucleotidase	Pyrimidine metabolism	0	0	1000	0		3.1.3.5	[7]
DTMPK	dTMP kinase	atp[c] + dtmp[c] <=> adp[c] + dtdp[c]	Tmk (Zmob_0230)	Zmob_0230	dTMP kinase	Pyrimidine metabolism	1	-1000	1000	0		2.7.4.9	KEGG
RNDR4	ribonucleoside-diphosphate reductase (UDP)	trdrd[c] + udp[c] -> dudp[c] + h2o[c] + trdox[c]	NrdA (Zmob_0277) and NrdB (Zmob_0977)	Zmob_0277 and Zmob_0977	ribonucleoside-diphosphate reductase	Pyrimidine metabolism	0	0	1000	0		1.17.4.1	KEGG
NDPK1	nucleoside-diphosphate kinase (ATP:GDP)	atp[c] + gdp[c] <=> adp[c] + gtp[c]	Adk (Zmob_1065)	Zmob_1065	nucleoside-diphosphate kinase	Pyrimidine metabolism	1	-1000	1000	0		2.7.4.6	BioCyc
NDPK2	nucleoside-diphosphate kinase (ATP:UDP)	atp[c] + udp[c] <=> adp[c] + utp[c]	Adk (Zmob_1065)	Zmob_1065	nucleoside-diphosphate kinase	Pyrimidine metabolism	1	-1000	1000	0		2.7.4.6	BioCyc
NDPK3	nucleoside-diphosphate kinase (ATP:CDP)	atp[c] + cdp[c] <=> adp[c] + ctp[c]	Adk (Zmob_1065)	Zmob_1065	nucleoside-diphosphate kinase	Pyrimidine metabolism	1	-1000	1000	0		2.7.4.6	BioCyc
NDPK4	nucleoside-diphosphate kinase (ATP:dTDP)	atp[c] + dtdp[c] <=> adp[c] + dttp[c]	Adk (Zmob_1065)	Zmob_1065	nucleoside-diphosphate kinase	Pyrimidine metabolism	1	-1000	1000	0		2.7.4.6	BioCyc
NDPK5	nucleoside-diphosphate kinase (ATP:dGDP)	atp[c] + dgdp[c] <=> adp[c] + dgtp[c]	Adk (Zmob_1065)	Zmob_1065	nucleoside-diphosphate kinase	Pyrimidine metabolism	1	-1000	1000	0		2.7.4.6	BioCyc
NDPK6	nucleoside-diphosphate kinase (ATP:dUDP)	atp[c] + dudp[c] <=> adp[c] + dutp[c]	Adk (Zmob_1065)	Zmob_1065	nucleoside-diphosphate kinase	Pyrimidine metabolism	1	-1000	1000	0		2.7.4.6	BioCyc
NDPK7	nucleoside-diphosphate kinase (ATP:dCDP)	atp[c] + dcdp[c] <=> adp[c] + dctp[c]	Adk (Zmob_1065)	Zmob_1065	nucleoside-diphosphate kinase	Pyrimidine metabolism	1	-1000	1000	0		2.7.4.6	BioCyc
NDPK8	nucleoside-diphosphate kinase (ATP:dADP)	atp[c] + dadp[c] <=> adp[c] + datp[c]	Adk (Zmob_1065)	Zmob_1065	nucleoside-diphosphate kinase	Pyrimidine metabolism	1	-1000	1000	0		2.7.4.6	BioCyc
ASP4DC	aspartate 4-decarboxylase	asp-L[c] + h[c] -> ala-L[c] + co2[c]	AsdA (Zmob_1458)	Zmob_1458	aspartate 4-decarboxylase	Alanine, aspartate and glutamate metabolism	0	0	1000	0		4.1.1.12	KEGG
ARGSS	argininosuccinate synthase	asp-L[c] + atp[c] + citr-L[c] -> amp[c] + argsuc[c] + h[c] + ppi[c]	ArgG (Zmob_0278)	Zmob_0278	argininosuccinate synthase	Alanine, aspartate and glutamate metabolism	0	0	1000	0		6.3.4.5	KEGG
ARGSL	argininosuccinate lyase	argsuc[c] <=> arg-L[c] + fum[c]	ArgH (Zmob_1376)	Zmob_1376	argininosuccinate lyase	Alanine, aspartate and glutamate metabolism	1	-1000	1000	0		4.3.2.1	KEGG
ASNN	L-asparaginase	asn-L[c] + h2o[c] -> asp-L[c] + nh4[c]	AnsA (Zmob_1457)	Zmob_1457	L-asparaginase	Alanine, aspartate and glutamate metabolism	0	0	1000	0		3.5.1.1	KEGG
ASPRS	aspartate racemase	asp-L[c] <=> asp-D[c]		Zmob_0169 or Zmob_0911	aspartate racemase	Alanine, aspartate and glutamate metabolism	1	-1000	1000	0		5.1.1.13	KEGG
ASNS1	asparagine synthase (glutamine-hydrolysing)	asp-L[c] + atp[c] + gln-L[c] + h2o[c] -> amp[c] + asn-L[c] + glu-L[c] + h[c] + ppi[c]				asparagine synthase	0	0	1000	0		6.3.5.4	[7]
ASNS2	asparagine synthetase	asp-L[c] + atp[c] + nh4[c] -> amp[c] + asn-L[c] + h[c] + ppi[c]				asparagine synthase	0	0	1000	0		6.3.1.1	[7]
ASPTA	aspartate transaminase	akg[c] + asp-L[c] <=> glu-L[c] + oaa[c]	AspC (Zmob_0884)	Zmob_0884	aspartate aminotransferase	Alanine, aspartate and glutamate metabolism	1	-1000	1000	0		2.6.1.1	KEGG
GLNS	glutamine synthetase	atp[c] + glu-L[c] + nh4[c] -> adp[c] + gln-L[c] + h[c] + pi[c]	GlnA (Zmob_1019)	Zmob_1019	glutamine synthetase	Alanine, aspartate and glutamate metabolism	0	0	1000	0		6.3.1.2	KEGG
GLUSy	glutamate synthase (NADPH)	akg[c] + gln-L[c] + h[c] + nadph[c] -> 2 glu-L[c] + nadp[c]	GltB (Zmob_0208 and Zmob_0209)	Zmob_0208 and Zmob_0209	glutamate synthase	Alanine, aspartate and glutamate metabolism	0	0	1000	0		1.4.1.13	KEGG
GLUDy	glutamate dehydrogenase (NADP)	glu-L[c] + h2o[c] + nadp[c] <=> akg[c] + h[c] + nadph[c] + nh4[c]	GltB ( Zmob_0209)	Zmob_0209	glutamate dehydrogenase	Alanine, aspartate and glutamate metabolism	1	-1000	1000	0		1.4.1.4	BioCyc
PGCD	phosphoglycerate dehydrogenase	3pg[c] + nad[c] -> 3php[c] + h[c] + nadh[c]	SerA (Zmob_1455)	Zmob_1455	D-3-phosphoglycerate dehydrogenase	Glycine, serine and threonine metabolism	0	0	1000	0		1.1.1.95	KEGG
PSERT	phosphoserine transaminase	3php[c] + glu-L[c] -> akg[c] + pser-L[c]	SerC (Zmob_1456)	Zmob_1456	phosphoserine aminotransferase	Glycine, serine and threonine metabolism	0	0	1000	0		2.6.1.52	KEGG
PSP_L	phosphoserine phosphatase (L-serine)	h2o[c] + pser-L[c] -> pi[c] + ser-L[c]	SerB (Zmob_0190)	Zmob_0190	phosphoserine phosphatase	Glycine, serine and threonine metabolism	0	0	1000	0		3.1.3.3	KEGG
SERD_L	L-serine deaminase	ser-L[c] -> nh4[c] + pyr[c]	SdaA (Zmob_0651)	Zmob_0651	L-serine dehydratase	Glycine, serine and threonine metabolism	0	0	1000	0		4.3.1.17	KEGG
GHMT2r	glycine hydroxymethyltransferase, reversible	ser-L[c] + thf[c] <=> gly[c] + h2o[c] + mlthf[c]	GlyA (Zmob_0130)	Zmob_0130	glycine hydroxymethyltransferase	Glycine, serine and threonine metabolism	1	-1000	1000	0		2.1.2.1	KEGG
5AOPS	5-aminolevulinate synthase	succoa[c] + gly[c] + h[c] -> 5aop[c] + coa[c] + co2[c]	ALAS (Zmob_0132)	Zmob_0132	5-aminolevulinate synthase	Glycine, serine and threonine metabolism	0	0	1000	0		2.3.1.37	KEGG
THRA2i	L-allo-Threonine Aldolase	athr-L[c] -> acald[c] + gly[c]	LtaE (Zmob_0009)	Zmob_0009	threonine aldolase	Glycine, serine and threonine metabolism	0	0	1000	0		4.1.2.5	KEGG
THRAi	Threonine aldolase	thr-L[c] -> acald[c] + gly[c]	LtaE (Zmob_0009)	Zmob_0009	threonine aldolase	Glycine, serine and threonine metabolism	0	0	1000	0		4.1.2.5	KEGG
THRD_L	L-threonine deaminase	thr-L[c] -> 2obut[c] + nh4[c]	TdcB (Zmob_0067)	Zmob_0067	threonine dehydratase	Glycine, serine and threonine metabolism	0	0	1000	0		4.3.1.19	KEGG
THRS	threonine synthase	h2o[c] + phom[c] -> pi[c] + thr-L[c]	ThrC (Zmob_1277)	Zmob_1277	threonine synthase	Glycine, serine and threonine metabolism	0	0	1000	0		4.2.3.1	KEGG
HSK	homoserine kinase	atp[c] + hom-L[c] -> adp[c] + h[c] + phom[c]	ThrB (Zmob_1538)	Zmob_1538	homoserine kinase	Glycine, serine and threonine metabolism	0	0	1000	0		2.7.1.39	KEGG
HSDy	homoserine dehydrogenase (NADPH)	hom-L[c] + nadp[c] <=> aspsa[c] + h[c] + nadph[c]	ThrA (Zmob_1010)	Zmob_1010	homoserine dehydrogenase	Glycine, serine and threonine metabolism	1	-1000	1000	0		1.1.1.3	KEGG
ASAD	aspartate-semialdehyde dehydrogenase	aspsa[c] + nadp[c] + pi[c] <=> 4pasp[c] + h[c] + nadph[c]	Asd (Zmob_1700)	Zmob_1700	aspartate-semialdehyde dehydrogenase	Glycine, serine and threonine metabolism	1	-1000	1000	0		1.2.1.11	KEGG
ASPK	aspartate kinase	asp-L[c] + atp[c] <=> 4pasp[c] + adp[c]	LysC (Zmob_1486)	Zmob_1486	aspartate kinase	Glycine, serine and threonine metabolism	1	-1000	1000	0		2.7.2.4	KEGG
CYSTL	cystathionine b-lyase	cyst-L[c] + h2o[c] -> hcys-L[c] + nh4[c] + pyr[c]	MetC (Zmob_0875)	Zmob_0875	cystathionine beta-lyase	Cysteine and methionine metabolism	0	0	1000	0		4.4.1.8	KEGG
SERAT	serine O-acetyltransferase	accoa[c] + ser-L[c] <=> acser[c] + coa[c]	CysE (Zmob_1409)	Zmob_1409	Serine O-acetyltransferase	Cysteine and methionine metabolism	1	-1000	1000	0		2.3.1.30	KEGG
CYSS	cysteine synthase	acser[c] + h2s[c] -> ac[c] + cys-L[c] + h[c]	CysK (Zmob_0473 and Zmob_0537)	Zmob_0473 and Zmob_0537	cysteine synthase	Cysteine and methionine metabolism	0	0	1000	0		2.5.1.47	KEGG
HOMAT	L-homoserine O-acetyltransferase	accoa[c] + hom-L[c] -> coa[c] + achms[c]	MetX (Zmob_0787)	Zmob_0787	homoserine O-acetyltransferase	Cysteine and methionine metabolism	0	0	1000	0		2.3.1.31	KEGG
CYSDS	Cysteine Desulfhydrase	cys-L[c] + h2o[c] -> h2s[c] + nh4[c] + pyr[c]	MetC (Zmob_0875)	Zmob_0875	cystathionine beta-lyase	Cysteine and methionine metabolism	0	0	1000	0		4.4.1.8	KEGG
HCYSS	L-homocysteine synthase	h2s[c] + achms[c] -> hcys-L[c] + h[c] + ac[c]	MetZ (Zmob_0604)	Zmob_0604	O-succinylhomoserine sulfhydrylase	Cysteine and methionine metabolism	0	0	1000	0	2	2.5.1.49	KEGG
AHCSH	S-Adenosyl-L-homocysteine hydrolase	ahcys[c] + h2o[c] -> hcys-L[c] + adn[c]	AhcY (Zmob_0657)	Zmob_0657	adenosylhomocysteinase	Cysteine and methionine metabolism	0	0	1000	0		3.3.1.1	KEGG
METS	methionine synthase	5mthf[c] + hcys-L[c] -> h[c] + met-L[c] + thf[c]	MetH (Zmob_1398 or Zmob_1399)	Zmob_1398 or Zmob_1399	methionine synthase	Cysteine and methionine metabolism	0	0	1000	0		2.1.1.13	KEGG
HCYSMT	5-Methyltetrahydropteroyltri-L-glutamate:L-homocysteine S-methyltransferase	mtglu[c] + hcys-L[c] + 4 h[c] -> tglu[c] + met-L[c]	MetE (Zmob_0310)	Zmob_0310	5-methyltetrahydropteroyltriglutamate/homocysteine S-methyltransferase	Cysteine and methionine metabolism	0	0	1000	0		2.1.1.14	KEGG
METAT	methionine adenosyltransferase	atp[c] + h2o[c] + met-L[c] -> amet[c] + pi[c] + ppi[c]	MetK (Zmob_0832)	Zmob_0832	S-adenosylmethionine synthetase	Cysteine and methionine metabolism	0	0	1000	0		2.5.1.6	KEGG
SHSL2	O-succinylhomoserine lyase (L-cysteine)	cys-L[c] + suchms[c] -> cyst-L[c] + h[c] + succ[c]	MetC (Zmob_0875)	Zmob_0875	O-succinylhomoserine lyase	Cysteine and methionine metabolism	0	0	1000	0	2	2.5.1.48	KEGG
HSST	homoserine O-succinyltransferase	hom-L[c] + succoa[c] -> coa[c] + suchms[c]			homoserine O-succinyltransferase	Cysteine and methionine metabolism	0	0	1000	0		2.3.1.46	[7]
ILETA	isoleucine transaminase	akg[c] + ile-L[c] <=> 3mop[c] + glu-L[c]	IlvE (Zmob_0391 or Zmob_0712)	Zmob_0391 or Zmob_0712	branched-chain amino acid aminotransferase	Valine, leucine and isoleucine degradation	1	-1000	1000	0		2.6.1.42	KEGG
VALTA	valine transaminase	akg[c] + val-L[c] <=> 3mob[c] + glu-L[c]	IlvE (Zmob_0391 or Zmob_0712)	Zmob_0391 or Zmob_0712	branched-chain amino acid aminotransferase	Valine, leucine and isoleucine degradation	1	-1000	1000	0		2.6.1.42	KEGG
LEUTAi	leucine transaminase (irreversible)	4mop[c] + glu-L[c] -> akg[c] + leu-L[c]	IlvE (Zmob_0391 or Zmob_0712)	Zmob_0391 or Zmob_0712	branched-chain amino acid aminotransferase	Valine, leucine and isoleucine degradation	0	0	1000	0		2.6.1.42	KEGG
IPMD	3-isopropylmalate dehydrogenase	3c2hmp[c] + nad[c] -> 3c4mop[c] + h[c] + nadh[c]	LeuB (Zmob_0603)	Zmob_0603	3-isopropylmalate dehydrogenase	Valine, leucine and isoleucine biosynthesis	0	0	1000	0		1.1.1.85	KEGG
IPPMIa	3-isopropylmalate dehydratase	3c2hmp[c] <=> 2ippm[c] + h2o[c]	LeuD (Zmob_0722) and LeuC (Zmob_0723)	Zmob_0722 and Zmob_0723	3-isopropylmalate dehydratase	Valine, leucine and isoleucine biosynthesis	1	-1000	1000	0		4.2.1.35	KEGG
IPPMIb	2-isopropylmalate hydratase	2ippm[c] + h2o[c] <=> 3c3hmp[c]	LeuD (Zmob_0722) and LeuC (Zmob_0723)	Zmob_0722 and Zmob_0723	3-isopropylmalate dehydratase	Valine, leucine and isoleucine biosynthesis	1	-1000	1000	0		4.2.1.35	KEGG
ACHBS	2-aceto-2-hydroxybutanoate synthase	2obut[c] + h[c] + pyr[c] -> 2ahbut[c] + co2[c]	IlvH (Zmob_0187) or IlvB (Zmob_0188 and Zmob_0593)	Zmob_0187 and Zmob_0188 and Zmob_0593	acetolactate synthase	Valine, leucine and isoleucine degradation	0	0	1000	0		2.2.1.6	KEGG
KARA1	ketol-acid reductoisomerase (2,3-dihydroxy-3-methylbutanoate)	23dhmb[c] + nadp[c] <=> alac-S[c] + h[c] + nadph[c]	IlvC (Zmob_0186)	Zmob_0186	ketol-acid reductoisomerase	Valine, leucine and isoleucine biosynthesis	1	-1000	1000	0		1.1.1.86	KEGG
KARA2	ketol-acid reductoisomerase (2-Acetolactate)	2ahbut[c] + h[c] + nadph[c] <=> 23dhmp[c] + nadp[c]	IlvC (Zmob_0186)	Zmob_0186	ketol-acid reductoisomerase	Valine, leucine and isoleucine biosynthesis	1	-1000	1000	0		1.1.1.86	KEGG
DHAD1	dihydroxy-acid dehydratase (2,3-dihydroxy-3-methylbutanoate)	23dhmb[c] -> 3mob[c] + h2o[c]	IlvD (Zmob_1359)	Zmob_1359	dihydroxy-acid dehydratase	Valine, leucine and isoleucine biosynthesis	0	0	1000	0		4.2.1.9	KEGG
DHAD2	Dihydroxy-acid dehydratase (2,3-dihydroxy-3-methylpentanoate)	23dhmp[c] -> 3mop[c] + h2o[c]	IlvD (Zmob_1359)	Zmob_1359	dihydroxy-acid dehydratase	Valine, leucine and isoleucine biosynthesis	0	0	1000	0		4.2.1.9	KEGG
IPPS	2-isopropylmalate synthase	3mob[c] + accoa[c] + h2o[c] -> 3c3hmp[c] + coa[c] + h[c]	LeuA (Zmob_0400)	Zmob_0400	2-isopropylmalate synthase	Valine, leucine and isoleucine biosynthesis	0	0	1000	0		2.3.3.13	KEGG
OMCDC	2-Oxo-4-methyl-3-carboxypentanoate decarboxylation	3c4mop[c] + h[c] -> 4mop[c] + co2[c]	SPONTANEOUS			Valine, leucine and isoleucine biosynthesis	0	0	1000	0			KEGG
DHDPS	dihydrodipicolinate synthase	aspsa[c] + pyr[c] -> 23dhdp[c] + h[c] + 2 h2o[c]	DapA (Zmob_0566 or Zmob_1304)	Zmob_0566 or Zmob_1304	dihydrodipicolinate synthase	Lysine biosynthesis	0	0	1000	0		4.3.3.7	KEGG
DHDPRy	dihydrodipicolinate reductase (NADPH)	23dhdp[c] + h[c] + nadph[c] -> nadp[c] + thdp[c]	DapB (Zmob_0578)	Zmob_0578	dihydrodipicolinate reductase	Lysine biosynthesis	0	0	1000	0		1.17.1.8	KEGG
THDPS	tetrahydrodipicolinate succinylase	h2o[c] + succoa[c] + thdp[c] -> coa[c] + sl2a6o[c]	DapD (Zmob_0965)	Zmob_0965	2,3,4,5-tetrahydropyridine-2,6-dicarboxylate N-succinyltransferase	Lysine biosynthesis	0	0	1000	0		2.3.1.117	KEGG
SDPTA	succinyldiaminopimelate transaminase	akg[c] + sl26da[c] <=> glu-L[c] + sl2a6o[c]	ArgD (Zmob_0944)	Zmob_0944	acetylornithine and succinylornithine aminotransferase	Lysine biosynthesis	1	-1000	1000	0		2.6.1.17	KEGG
SDPDS	succinyl-diaminopimelate desuccinylase	h2o[c] + sl26da[c] -> 26dap-LL[c] + succ[c]	DapE (Zmob_1507)	Zmob_1507	succinyl-diaminopimelate desuccinylase	Lysine biosynthesis	0	0	1000	0		3.5.1.18	KEGG
DAPE	diaminopimelate epimerase	26dap-LL[c] <=> 26dap-M[c]	DapF (Zmob_0245)	Zmob_0245	diaminopimelate epimerase	Lysine biosynthesis	1	-1000	1000	0		5.1.1.7	KEGG
DAPDC	diaminopimelate decarboxylase	26dap-M[c] + h[c] -> co2[c] + lys-L[c]	LysA (Zmob_1378)	Zmob_1378	diaminopimelate decarboxylase	Lysine biosynthesis	0	0	1000	0		4.1.1.20	KEGG
UAAGDS	UDP-N-acetylmuramoyl-L-alanyl-D-glutamyl-meso-2,6-diaminopimelate synthetase	26dap-M[c] + atp[c] + uamag[c] -> adp[c] + h[c] + pi[c] + ugmd[c]	MurE (Zmob_0468)	Zmob_0468	UDP-N-acetylmuramyl tripeptide synthetase	Lysine biosynthesis	0	0	1000	0		6.3.2.13	KEGG
UGMDDS	UDP-N-acetylmuramoyl-L-alanyl-D-glutamyl-meso-2,6-diaminopimeloyl-D-alanyl-D-alanine synthetase	alaala[c] + atp[c] + ugmd[c] -> adp[c] + h[c] + pi[c] + ugmda[c]		Zmob_0467	UDP-N-acetylmuramoylalanyl-D-glutamyl-2,6-diaminopimelate/D-alanyl-D-alanyl ligase	Lysine biosynthesis	0	0	1000	0		6.3.2.10	KEGG
ARGH	L-Arginine amidinohydrolase	arg-L[c] + h2o[c] -> orn[c] + urea[c]	Arg (Zmob_0966)	Zmob_0966	arginase	Arginine and proline metabolism	0	0	1000	0		3.5.3.1	KEGG
ACGS	N-acetylglutamate synthase	accoa[c] + glu-L[c] -> acglu[c] + coa[c] + h[c]	ArgA (Zmob_0379)	Zmob_0379	N-acetylglutamate synthase	Arginine and proline metabolism	0	0	1000	0		2.3.1.1	KEGG
ACGK	acetylglutamate kinase	acglu[c] + atp[c] -> acg5p[c] + adp[c]	ArgB (Zmob_1627)	Zmob_1627	acetylglutamate kinase	Arginine and proline metabolism	0	0	1000	0		2.7.2.8	KEGG
AGPR	N-acetyl-g-glutamyl-phosphate reductase	acg5sa[c] + nadp[c] + pi[c] <=> acg5p[c] + h[c] + nadph[c]	ArgC (Zmob_0487)	Zmob_0487	N-acetyl-gamma-glutamyl-phosphate reductase	Arginine and proline metabolism	1	-1000	1000	0		1.2.1.38	KEGG
ACOTA	acetylornithine transaminase	acorn[c] + akg[c] <=> acg5sa[c] + glu-L[c]	ArgD (Zmob_0944)	Zmob_0944	acetylornithine and succinylornithine aminotransferase	Arginine and proline metabolism	1	-1000	1000	0		2.6.1.11	KEGG
ACODA	acetylornithine deacetylase	acorn[c] + h2o[c] -> ac[c] + orn[c]	ArgE (Zmob_0379)	Zmob_0379	glutamate N-acetyltransferase	Arginine and proline metabolism	0	0	1000	0		2.3.1.35	KEGG
GLU5K	glutamate 5-kinase	atp[c] + glu-L[c] -> adp[c] + glu5p[c]	ProB (Zmob_0633)	Zmob_0633	glutamate 5-kinase	Arginine and proline metabolism	0	0	1000	0		2.7.2.11	KEGG
G5SD	glutamate-5-semialdehyde dehydrogenase	glu5p[c] + h[c] + nadph[c] -> glu5sa[c] + nadp[c] + pi[c]	ProA (Zmob_1478)	Zmob_1478	glutamate-5-semialdehyde dehydrogenase	Arginine and proline metabolism	0	0	1000	0		1.2.1.41	KEGG
G5SADs	L-glutamate 5-semialdehyde dehydratase (spontaneous)	glu5sa[c] -> 1pyr5c[c] + h[c] + h2o[c]	SPONTANEOUS		SPONTANEOUS	Arginine and Proline Metabolism	0	0	1000	0			KEGG
P5CR	pyrroline-5-carboxylate reductase	1pyr5c[c] + 2 h[c] + nadph[c] -> nadp[c] + pro-L[c]	ProC (Zmob_0046 or Zmob_0862)	Zmob_0046 or Zmob_0862	pyrroline-5-carboxylate reductase	Arginine and proline metabolism	0	0	1000	0		1.5.1.2	KEGG
ORNDC	Ornithine Decarboxylase	h[c] + orn[c] -> co2[c] + ptrc[c]	SpeC (Zmob_0290)	Zmob_0290	ornithine decarboxylase	Arginine and proline metabolism	0	0	1000	0		4.1.1.17	KEGG
SGSAD	Succinylglutamic semialdehyde dehydrogenase	h2o[c] + nad[c] + sucgsa[c] -> 2 h[c] + nadh[c] + sucglu[c]	AstD (Zmob_0069)	Zmob_0069	succinylglutamic semialdehyde dehydrogenase	Arginine and proline metabolism	0	0	1000	0		1.2.1.71	KEGG
SGDS	Succinylglutamate desuccinylase	h2o[c] + sucglu[c] -> glu-L[c] + succ[c]				Arginine and proline metabolism	0	0	1000	0		3.5.1.96	BioCyc
SOTA	Succinylornithine transaminase	akg[c] + sucorn[c] -> glu-L[c] + sucgsa[c]	AstC (Zmob_0944)	Zmob_0944	Succinylornithine transaminase	Arginine and proline metabolism	0	0	1000	0		2.6.1.81	BioCyc
SADH	Succinylarginine dihydrolase	2 h[c] + 2 h2o[c] + sucarg[c] -> co2[c] + 2 nh4[c] + sucorn[c]	AstB (Zmob_0157)	Zmob_0157	N-succinylarginine dihydrolase	Arginine and proline metabolism	0	0	1000	0		3.5.3.23	KEGG
AST	Arginine succinyltransferase	arg-L[c] + succoa[c] -> coa[c] + h[c] + sucarg[c]			Arginine succinyltransferase	Arginine and proline metabolism	0	0	1000	0		2.3.1.109	BioCyc
ARGDC	arginine decarboxylase	arg-L[c] + h[c] -> agm[c] + co2[c]				Arginine and proline metabolism	0	0	1000	0		4.1.1.19	BioCyc
AGMH	Agmatine iminohydrolase	agm[c] + h2o[c] -> cbptrc[c] + nh4[c]		Zmob_1732	agmatine deiminase	Arginine and proline metabolism	0	0	1000	0		3.5.3.12	KEGG
CBPTRCAS	N-Carbamoylputrescine amidohydrolase	cbptrc[c] + h2o[c] + 2 h[c] -> ptrc[c] + co2[c] + nh4[c]	AguB (Zmob_1731)	Zmob_1731	N-carbamoylputrescine amidase	Arginine and proline metabolism	0	0	1000	0		3.5.1.53	KEGG
ADMDC	adenosylmethionine decarboxylase	amet[c] + h[c] -> ametam[c] + co2[c]				Arginine and proline metabolism	0	0	1000	0		4.1.1.50	[7]
SPMS	spermidine synthase	ametam[c] + ptrc[c] -> 5mta[c] + h[c] + spmd[c]				Arginine and proline metabolism	0	0	1000	0		2.5.1.16	KEGG
OCBT	ornithine carbamoyltransferase	cbp[c] + orn[c] <=> citr-L[c] + h[c] + pi[c]		zmob_0945	ornithine carbamoyltransferase	Arginine and proline metabolism	1	-1000	1000	0		2.1.3.3	BioCyc
MTAN	methylthioadenosine nucleosidase	5mta[c] + h2o[c] -> 5mtr[c] + ade[c]			methylthioadenosine nucleosidase	Arginine and Proline Metabolism	0	0	1000	0		3.2.2.16	[7]
ATPPRT	ATP phosphoribosyltransferase	atp[c] + prpp[c] -> ppi[c] + prbatp[c]	HisZ (Zmob_1454) and HisG (Zmob_1580)	Zmob_1454 and Zmob_1580	ATP phosphoribosyltransferase	Histidine metabolism	0	0	1000	0		2.4.2.17	KEGG
PRATPP	phosphoribosyl-ATP pyrophosphatase	h2o[c] + prbatp[c] -> h[c] + ppi[c] + prbamp[c]	HisE (Zmob_1622)	Zmob_1622	phosphoribosyl-ATP diphosphatase	Histidine metabolism	0	0	1000	0		3.6.1.31	KEGG
PRAMPC	phosphoribosyl-AMP cyclohydrolase	h2o[c] + prbamp[c] -> prfp[c]	HisI (Zmob_0152)	Zmob_0152	phosphoribosyl-AMP cyclohydrolase	Histidine metabolism	0	0	1000	0		3.5.4.19	KEGG
PRMICI	1-(5-phosphoribosyl)-5-[(5-phosphoribosylamino)methylideneamino)imidazole-4-carboxamide isomerase	prfp[c] <=> prlp[c]	HisA (Zmob_1620)	Zmob_1620	phosphoribosylformimino-5-aminoimidazole carboxamide ribotide isomerase	Histidine metabolism	1	-1000	1000	0		5.3.1.16	KEGG
IG3PS	Imidazole-glycerol-3-phosphate synthase	gln-L[c] + prlp[c] -> aicar[c] + eig3p[c] + glu-L[c] + h[c]	HisF (Zmob_1621) and HisH (Zmob_1619)	Zmob_1621 and Zmob_1619	imidazole glycerol phosphate synthase	Histidine metabolism	0	0	1000	0		2.4.2.- and 4.1.3.-	KEGG
IGPDH	imidazoleglycerol-phosphate dehydratase	eig3p[c] -> h2o[c] + imacp[c]	HisB (Zmob_1618)	Zmob_1618	imidazoleglycerol-phosphate dehydratase	Histidine metabolism	0	0	1000	0		4.2.1.19	KEGG
HSTPT	histidinol-phosphate transaminase	glu-L[c] + imacp[c] -> akg[c] + hisp[c]	HisC (Zmob_0956 and Zmob_1087 and Zmob_1197 and Zmob_1746)	Zmob_0956 and Zmob_1087 and Zmob_1197 and Zmob_1746	histidinol-phosphate aminotransferase	Histidine metabolism	0	0	1000	0		2.6.1.9	KEGG
HISTP	histidinol-phosphatase	h2o[c] + hisp[c] -> histd[c] + pi[c]	HisB (Zmob_1618)	Zmob_1618	imidazoleglycerol-phosphate dehydratase	Histidine metabolism	0	0	1000	0		3.1.3.15	BioCyc
HISTD	histidinol dehydrogenase	h2o[c] + histd[c] + 2 nad[c] -> 3 h[c] + his-L[c] + 2 nadh[c]	HisD (Zmob_1579)	Zmob_1579	histidinol dehydrogenase	Histidine metabolism	0	0	1000	0		1.1.1.23	KEGG
TYRTA	tyrosine transaminase	akg[c] + tyr-L[c] <=> 34hpp[c] + glu-L[c]	AspC (Zmob_0884) or TyrB (Zmob_0366)	Zmob_0884 or Zmob_0366	tyrosine transaminase	Phenylalanine, tyrosine and tryptophan biosynthesis	1	-1000	1000	0		2.6.1.5	KEGG
PHETA1	phenylalanine transaminase	akg[c] + phe-L[c] <=> glu-L[c] + phpyr[c]	AspC (Zmob_0884) or TyrB (Zmob_0366)	Zmob_0884 or Zmob_0366	phenylalanine transaminase	Phenylalanine, tyrosine and tryptophan biosynthesis	1	-1000	1000	0		2.6.1.58	KEGG
DDPA	3-deoxy-D-arabino-heptulosonate 7-phosphate synthetase	e4p[c] + h2o[c] + pep[c] -> 2dda7p[c] + pi[c]	AroG (Zmob_0653)	Zmob_0653	3-deoxy-7-phosphoheptulonate synthase	Phenylalanine, tyrosine and tryptophan biosynthesis	0	0	1000	0		2.5.1.54	KEGG
DHQS	3-dehydroquinate synthase	2dda7p[c] -> 3dhq[c] + pi[c]	AroB (Zmob_1118)	Zmob_1118	3-dehydroquinate synthase	Phenylalanine, tyrosine and tryptophan biosynthesis	0	0	1000	0		4.2.3.4	KEGG
DHQTi	3-dehydroquinate dehydratase, irreversible	3dhq[c] -> 3dhsk[c] + h2o[c]	AroQ (Zmob_0551)	Zmob_0551	3-dehydroquinate dehydratase	Phenylalanine, tyrosine and tryptophan biosynthesis	0	0	1000	0		4.2.1.10	KEGG
SHK3Dr	shikimate dehydrogenase	3dhsk[c] + h[c] + nadph[c] <=> nadp[c] + skm[c]	AroE (Zmob_0764)	Zmob_0764	shikimate 5-dehydrogenase	Phenylalanine, tyrosine and tryptophan biosynthesis	1	-1000	1000	0		1.1.1.25	KEGG
SHKK	shikimate kinase	atp[c] + skm[c] -> adp[c] + h[c] + skm5p[c]	AroK (Zmob_1119)	Zmob_1119	shikimate kinase	Phenylalanine, tyrosine and tryptophan biosynthesis	0	0	1000	0		2.7.1.71	KEGG
PSCVT	3-phosphoshikimate 1-carboxyvinyltransferase	pep[c] + skm5p[c] <=> 3psme[c] + pi[c]	AroA (Zmob_1356)	Zmob_1356	3-phosphoshikimate 1-carboxyvinyltransferase	Phenylalanine, tyrosine and tryptophan biosynthesis	1	-1000	1000	0		2.5.1.19	KEGG
CHORS	chorismate synthase	3psme[c] -> chor[c] + pi[c]	AroC (Zmob_1447)	Zmob_1447	chorismate synthase	Phenylalanine, tyrosine and tryptophan biosynthesis	0	0	1000	0		4.2.3.5	KEGG
ANS	anthranilate synthase	chor[c] + gln-L[c] -> anth[c] + glu-L[c] + h[c] + pyr[c]	TrpG (Zmob_0638) and TrpE (Zmob_0996)	Zmob_0638 and Zmob_0996	glutamine amidotransferase of anthranilate synthase	Phenylalanine, tyrosine and tryptophan biosynthesis	0	0	1000	0		4.1.3.27	KEGG
ANPRT	anthranilate phosphoribosyltransferase	anth[c] + prpp[c] -> ppi[c] + pran[c]	TrpD (Zmob_0639)	Zmob_0639	anthranilate phosphoribosyltransferase	Phenylalanine, tyrosine and tryptophan biosynthesis	0	0	1000	0		2.4.2.18	KEGG
PRAIi	phosphoribosylanthranilate isomerase (irreversible)	pran[c] -> 2cpr5p[c]	TrpF (Zmob_1111)	Zmob_1111	phosphoribosylanthranilate isomerase	Phenylalanine, tyrosine and tryptophan biosynthesis	0	0	1000	0		5.3.1.24	KEGG
IGPS	indole-3-glycerol-phosphate synthase	2cpr5p[c] + h[c] -> 3ig3p[c] + co2[c] + h2o[c]	TrpC (Zmob_1072)	Zmob_1072	indole-3-glycerol phosphate synthase	Phenylalanine, tyrosine and tryptophan biosynthesis	0	0	1000	0		4.1.1.48	KEGG
TRPS1	tryptophan synthase (indoleglycerol phosphate)	3ig3p[c] + ser-L[c] -> g3p[c] + h2o[c] + trp-L[c]	TrpA (Zmob_1109) and TrpB (Zmob_1110)	Zmob_1109 and Zmob_1110	tryptophan synthase	Phenylalanine, tyrosine and tryptophan biosynthesis	0	0	1000	0		4.2.1.20	KEGG
TRPS2	tryptophan synthase (indole)	indole[c] + ser-L[c] -> h2o[c] + trp-L[c]	TrpA (Zmob_1109) and TrpB (Zmob_1110)	Zmob_1109 and Zmob_1110	tryptophan synthase	Phenylalanine, tyrosine and tryptophan biosynthesis	0	0	1000	0		4.2.1.20	KEGG
TRPS3	tryptophan synthase (indoleglycerol phosphate)	3ig3p[c] -> g3p[c] + indole[c]	TrpA (Zmob_1109) and TrpB (Zmob_1110)	Zmob_1109 and Zmob_1110	tryptophan synthase	Phenylalanine, tyrosine and tryptophan biosynthesis	0	0	1000	0		4.2.1.20	KEGG
CHORM	chorismate mutase	chor[c] -> pphn[c]	TyrA (Zmob_1088)	Zmob_1088	chorismate mutase	Phenylalanine, tyrosine and tryptophan biosynthesis	0	0	1000	0		5.4.99.5	KEGG
PPND	prephenate dehydrogenase	nad[c] + pphn[c] -> 34hpp[c] + co2[c] + nadh[c]	TyrC (Zmob_0955)	Zmob_0955	prephenate dehydrogenase	Phenylalanine, tyrosine and tryptophan biosynthesis	0	0	1000	0		1.3.1.12	KEGG
PPNDH	prephenate dehydratase	h[c] + pphn[c] -> co2[c] + h2o[c] + phpyr[c]	PheA (Zmob_1463)	Zmob_1463	prephenate dehydratase	Phenylalanine, tyrosine and tryptophan biosynthesis	0	0	1000	0		4.2.1.51	KEGG
AROS	Arogenate synthase	pphn[c] + glu-L[c] -> aro-L[c] + akg[c]	AspB (Zmob_0884)	Zmob_0884	aspartate aminotransferase	Phenylalanine, tyrosine and tryptophan biosynthesis	0	0	1000	0		2.6.1.79	BioCyc
ARODH	Arogenate dehydrogenase	aro-L[c] + nad[c] -> tyr-L[c] + co2[c] + nadh[c]	TyrC (Zmob_0955)	Zmob_0955	Arogenate dehydrogenase	Phenylalanine, tyrosine and tryptophan biosynthesis	0	0	1000	0		1.3.1.43	KEGG
GLUR	glutamate racemase	glu-D[c] <=> glu-L[c]	MurI (Zmob_0133)	Zmob_0133	glutamate racemase	D-Glutamine and D-glutamate metabolism	1	-1000	1000	0		5.1.1.3	KEGG
UAMAGS	UDP-N-acetylmuramoyl-L-alanyl-D-glutamate synthetase	atp[c] + glu-D[c] + uama[c] -> adp[c] + h[c] + pi[c] + uamag[c]	MurD (Zmob_0465)	Zmob_0465	UDP-N-acetylmuramoylalanine--D-glutamate ligase	D-Glutamine and D-glutamate metabolism	0	0	1000	0		6.3.2.9	KEGG
UAMAS	UDP-N-acetylmuramoyl-L-alanine synthetase	ala-L[c] + atp[c] + uamr[c] -> adp[c] + h[c] + pi[c] + uama[c]	MurC (Zmob_0462)	Zmob_0462	UDP-N-acetylmuramate--alanine ligase	D-Glutamine and D-glutamate metabolism	0	0	1000	0		6.3.2.8	KEGG
ALAR	alanine racemase	ala-L[c] <=> ala-D[c]	Alr (Zmob_1543)	Zmob_1543	alanine racemase	D-Alanine metabolism	1	-1000	1000	0		5.1.1.1	KEGG
ALAALAr	D-alanine-D-alanine ligase (reversible)	2 ala-D[c] + atp[c] <=> adp[c] + alaala[c] + h[c] + pi[c]	Ddl (Zmob_0460)	Zmob_0460	D-alanine-D-alanine ligase	D-Alanine metabolism	1	-1000	1000	0		6.3.2.4	KEGG
GLUCYS	gamma-glutamylcysteine synthetase	atp[c] + cys-L[c] + glu-L[c] -> adp[c] + glucys[c] + h[c] + pi[c]	GshA (Zmob_1575)	Zmob_1575	glutamate--cysteine ligase	Glutathione metabolism	0	0	1000	0		6.3.2.2	KEGG
AMPTASECG	alanyl aminopeptidase (cys-gly)	cgly[c] + h2o[c] -> cys-L[c] + gly[c]	PepN (Zmob_0011 or Zmob_1371) or PepA (Zmob_0040)	Zmob_0011 or Zmob_1371	aminopeptidase N	Glutathione metabolism	0	0	1000	0		3.4.11.2	KEGG
GTHRDHpp	glutathione hydralase	gthrd[c] + h2o[c] -> cgly[c] + glu-L[c]	Ggt (Zmob_1718)	Zmob_1718	gamma-glutamyltranspeptidase	Glutathione metabolism	0	0	1000	0		2.3.2.2	KEGG
GTHOr	glutathione oxidoreductase	gthox[c] + h[c] + nadph[c] <=> 2 gthrd[c] + nadp[c]	Gor (Zmob_0123)	Zmob_0123	glutathione reductase	Glutathione metabolism	1	-1000	1000	0		1.8.1.7	KEGG
GTHS	glutathione synthetase	atp[c] + glucys[c] + gly[c] -> adp[c] + gthrd[c] + h[c] + pi[c]	GshB (Zmob_1254)	Zmob_1254	glutathione synthase	Glutathione metabolism	0	0	1000	0		6.3.2.3	KEGG
PAPPT3	phospho-N-acetylmuramoyl-pentapeptide-transferase (meso-2,6-diaminopimelate)	udcpp[c] + ugmda[c] -> uagmda[c] + ump[c]	MraY (Zmob_0466)	Zmob_0466	phospho-N-acetylmuramoyl-pentapeptide-transferase	Peptidoglycan biosynthesis	0	0	1000	0		2.7.8.13	KEGG
UAGPT3	UDP-N-acetylglucosamine-N-acetylmuramyl-(pentapeptide)pyrophosphoryl-undecaprenol N-acetylglucosamine transferase	uacgam[c] + uagmda[c] -> h[c] + uaagmda[c] + udp[c]	MurG (Zmob_0463)	Zmob_0463	UDP-N-acetylglucosamine--N-acetylmuramyl-(pentapeptide) pyrophosphoryl-undecaprenol N-acetylglucosamine transferase	Peptidoglycan biosynthesis	0	0	1000	0		2.4.1.227	KEGG
UDCPDP	undecaprenyl-diphosphatase	h2o[c] + udcpdp[c] -> h[c] + pi[c] + udcpp[c]	BacA (Zmob_0210)	Zmob_0210	undecaprenyl-diphosphatase	Peptidoglycan biosynthesis	0	0	1000	0		3.6.1.27	KEGG
MPTG	murein polymerizing transglycosylase	2 uaagmda[c] -> 2 h[c] + 2 udcpdp[c] + murein5p5p[c]	MviN (Zmob_1500) or MtgA (Zmob_0346) or MrcA (Zmob_0642) or MrdA (Zmob_0900) or FtsI (Zmob_0469) or DacA (Zmob_0231)	Zmob_1500 or Zmob_0346 or Zmob_0642 or Zmob_0900 or Zmob_0469 or Zmob_0231	murein polymerizing transglycosylase	Peptidoglycan biosynthesis	0	0	1000	0			[7]
MPTG2	murein polymerizing transglycosylase 2 (three linked units)	uaagmda[c] + murein5p5p[c] -> h[c] + udcpdp[c] + murein5p5p5p[c]	MviN (Zmob_1500) or MtgA (Zmob_0346) or MrcA (Zmob_0642) or MrdA (Zmob_0900) or FtsI (Zmob_0469) or DacA (Zmob_0231)	Zmob_1500 or Zmob_0346 or Zmob_0642 or Zmob_0900 or Zmob_0469 or Zmob_0231	murein polymerizing transglycosylase	Peptidoglycan biosynthesis	0	0	1000	0			[7]
A5PISO	arabinose-5-phosphate isomerase	ru5p-D[c] <=> ara5p[c]	GutQ (Zmob_1595)	Zmob_1595	arabinose-5-phosphate isomerase	Lipopolysaccharide biosynthesis	1	-1000	1000	0		5.3.1.13	BioCyc
KDOPS	3-deoxy -D-manno-octulosonic -acid 8-phosphate synthase	ara5p[c] + h2o[c] + pep[c] -> kdo8p[c] + pi[c]	KdsA (Zmob_1632)	Zmob_1632	2-dehydro-3-deoxyphosphooctonate aldolase	Lipopolysaccharide biosynthesis	0	0	1000	0		2.5.1.55	KEGG
KDOPP	3-deoxy-manno-octulosonate-8-phosphatase	h2o[c] + kdo8p[c] -> kdo[c] + pi[c]				Lipopolysaccharide biosynthesis	0	0	1000	0		3.1.3.45	BioCyc
KDOCT2	3-deoxy-manno-octulosonate cytidylyltransferase	ctp[c] + kdo[c] -> ckdo[c] + ppi[c]	KdsB (Zmob_1631)	Zmob_1631	3-deoxy-manno-octulosonate cytidylyltransferase	Lipopolysaccharide biosynthesis	0	0	1000	0		2.7.7.38	KEGG
AMPMS2	4-amino-2-methyl-5-phosphomethylpyrimidine synthetase	air[c] + h2o[c] + nad[c] -> 4ampm[c] + 2 for[c] + 3 h[c] + nadh[c]	ThiC (Zmob_0666)	Zmob_0666	thiamine biosynthesis protein ThiC	Thiamine metabolism	0	0	1000	0		4.1.99.17	KEGG
HMPK1	hydroxymethylpyrimidine kinase (ATP)	4ahmmp[c] + atp[c] -> 4ampm[c] + adp[c] + h[c]	ThiD (Zmob_0307)	Zmob_0307	phosphomethylpyrimidine kinase	Thiamine metabolism	0	0	1000	0		2.7.1.49	KEGG
PMPK	phosphomethylpyrimidine kinase	4ampm[c] + atp[c] -> 2mahmp[c] + adp[c]	ThiD (Zmob_0307)	Zmob_0307	phosphomethylpyrimidine kinase	Thiamine metabolism	0	0	1000	0		2.7.4.7	KEGG
TMPPP	thiamine-phosphate diphosphorylase	2mahmp[c] + 4mpetz[c] + h[c] -> ppi[c] + thmmp[c]	ThiE (Zmob_0879 or Zmob_1683)	Zmob_0879 or Zmob_1683	thiamine-phosphate pyrophosphorylase	Thiamine metabolism	0	0	1000	0		2.5.1.3	KEGG
TMPK	thiamine-phosphate kinase	atp[c] + thmmp[c] -> adp[c] + thmpp[c]	ThiL (Zmob_1577)	Zmob_1577	thiamine-monophosphate kinase	Thiamine metabolism	0	0	1000	0		2.7.4.16	KEGG
DXPS	1-deoxy-D-xylulose 5-phosphate synthase	g3p[c] + h[c] + pyr[c] -> co2[c] + dxyl5p[c]	Dxs (Zmob_0102 or Zmob_1540)	Zmob_0102 or Zmob_1540	deoxyxylulose-5-phosphate synthase	Thiamine metabolism	0	0	1000	0		2.2.1.7	KEGG
TYRL	tyrosine lyase	amet[c] + nadph[c] + tyr-L[c] -> 4crsol[c] + dad-5[c] + dhgly[c] + h[c] + met-L[c] + nadp[c]	ThiG (Zmob_0550)	Zmob_0550	thiamine biosynthesis protein ThiS	Thiamine metabolism	0	0	1000	0			KEGG
GTPCII2	GTP cyclohydrolase II (25drapp)	gtp[c] + 3 h2o[c] -> 25drapp[c] + for[c] + 2 h[c] + ppi[c]	RibBA (Zmob_1001) or RibA (Zmob_1441)	Zmob_1001 or Zmob_1441	GTP cyclohydrolase II	Riboflavin metabolism	0	0	1000	0		3.5.4.25	KEGG
DHPPDA2	diaminohydroxyphosphoribosylaminopryrimidine deaminase (25drapp)	25drapp[c] + h[c] + h2o[c] -> 5apru[c] + nh4[c]	RibD (Zmob_1003)	Zmob_1003	riboflavin biosynthesis protein RibD	Riboflavin metabolism	0	0	1000	0		3.5.4.26	KEGG
APRAUR	5-amino-6-(5-phosphoribosylamino)uracil reductase	5apru[c] + h[c] + nadph[c] -> 5aprbu[c] + nadp[c]	RibD (Zmob_1003)	Zmob_1003	5-amino-6-(5-phosphoribosylamino)uracil reductase	Riboflavin metabolism	0	0	1000	0		1.1.1.193	KEGG
PMDPHT	pyrimidine phosphatase	5aprbu[c] + h2o[c] -> 4r5au[c] + pi[c]			pyrimidine phosphatase	Riboflavin metabolism	0	0	1000	0		3.1.3.-	[7]
DB4PS	3,4-Dihydroxy-2-butanone-4-phosphate synthase	ru5p-D[c] -> db4p[c] + for[c] + h[c]	RibBA (Zmob_1001)	Zmob_1001	3,4-dihydroxy-2-butanone 4-phosphate synthase	Riboflavin metabolism	0	0	1000	0		4.1.99.12	KEGG
RBFSa	riboflavin synthase	4r5au[c] + db4p[c] -> dmlz[c] + 2 h2o[c] + pi[c]	RibH (Zmob_1000)	Zmob_1000	6,7-dimethyl-8-ribityllumazine synthase	Riboflavin metabolism	0	0	1000	0		2.5.1.78	KEGG
RBFSb	riboflavin synthase	2 dmlz[c] -> 4r5au[c] + ribflv[c]	RibE (Zmob_1002)	Zmob_1002	riboflavin synthase	Riboflavin metabolism	0	0	1000	0		2.5.1.9	KEGG
RBFK	riboflavin kinase	atp[c] + ribflv[c] -> adp[c] + fmn[c] + h[c]	RibF (Zmob_0870)	Zmob_0870	riboflavin biosynthesis protein RibF	Riboflavin metabolism	0	0	1000	0		2.7.1.26	KEGG
FMNAT	FMN adenylyltransferase	atp[c] + fmn[c] + h[c] -> fad[c] + ppi[c]	RibF (Zmob_0870)	Zmob_0870	FMN adenylyltransferase	Riboflavin metabolism	0	0	1000	0		2.7.7.2	KEGG
PDX5POi	pyridoxine 5'-phosphate oxidase	o2[c] + pdx5p[c] -> h2o2[c] + pydx5p[c]	PdxH (Zmob_0445)	Zmob_0445	pyridoxamine 5'-phosphate oxidase	Vitamin B6 metabolism	0	0	1000	0		1.4.3.5	KEGG
ALATA_D2	D-alanine transaminase	ala-D[c] + pydx5p[c] -> pyam5p[c] + pyr[c]	GlyA (Zmob_0130)	Zmob_0130	glycine hydroxymethyltransferase	Vitamin B6 metabolism	0	0	1000	0			[7]
ALATA_L2	alanine transaminase	ala-L[c] + pydx5p[c] -> pyam5p[c] + pyr[c]	GlyA (Zmob_0130)	Zmob_0130	glycine hydroxymethyltransferase	Vitamin B6 metabolism	0	0	1000	0			[7]
PYAM5PO	pyridoxamine 5'-phosphate oxidase	h2o[c] + o2[c] + pyam5p[c] -> h2o2[c] + nh4[c] + pydx5p[c]	PdxH (Zmob_0445)	Zmob_0445	pyridoxamine 5'-phosphate oxidase	Vitamin B6 metabolism	0	0	1000	0		1.4.3.5	KEGG
PDX5PS	Pyridoxine 5'-phosphate synthase	dxyl5p[c] + nad[c] + phthr[c] -> co2[c] + h[c] + 2 h2o[c] + nadh[c] + pdx5p[c] + pi[c]	PdxJ (Zmob_1432) and PdxA (Zmob_0037)	Zmob_1432 and Zmob_0037	pyridoxal phosphate biosynthetic	Vitamin B6 metabolism	0	0	1000	0		2.6.99.2	KEGG
4HTHRS	4-Hydroxy-L-threonine synthase	h2o[c] + phthr[c] -> 4hthr[c] + pi[c]	ThrC (Zmob_1277)	Zmob_1277	threonine synthase	Vitamin B6 metabolism	0	0	1000	0		4.2.3.1	KEGG
OHPBAT	O-Phospho-4-hydroxy-L-threonine:2-oxoglutarate aminotransferase	glu-L[c] + ohpb[c] <=> akg[c] + phthr[c]	SerC (Zmob_1456)	Zmob_1456	phosphoserine aminotransferase	Vitamin B6 metabolism	1	-1000	1000	0		2.6.1.52	KEGG
PERD	Erythronate 4-phosphate (4per) dehydrogenase	4per[c] + nad[c] <=> h[c] + nadh[c] + ohpb[c]	PdxB (Zmob_1445)	Zmob_1445	erythronate-4-phosphate dehydrogenase	Vitamin B6 metabolism	1	-1000	1000	0		1.1.1.290	BioCyc
E4PD	Erythrose 4-phosphate dehydrogenase	e4p[c] + h2o[c] + nad[c] <=> 4per[c] + 2 h[c] + nadh[c]	Epd (Zmob_0661)	Zmob_0661	Erythrose 4-phosphate dehydrogenase	Vitamin B6 metabolism	1	-1000	1000	0		1.2.1.72	BioCyc
NMNAT	nicotinamide-nucleotide adenylyltransferase	atp[c] + h[c] + nmn[c] -> nad[c] + ppi[c]	NadD (Zmob_1477)	Zmob_1477	Nicotinate-nucleotide adenylyltransferase	Nicotinate and nicotinamide metabolism	0	0	1000	0		2.7.7.18	BioCyc
NADDP	NAD diphosphatase	h2o[c] + nad[c] -> amp[c] + 2 h[c] + nmn[c]		Zmob_0365	NAD diphosphatase	Nicotinate and nicotinamide metabolism	0	0	1000	0		3.6.1.22	BioCyc
NMNN	NMN nucleosidase	h2o[c] + nmn[c] -> h[c] + ncam[c] + r5p[c]			NMN nucleosidase	Nicotinate and nicotinamide metabolism	0	0	1000	0		3.2.2.14	BioCyc
NNAM	nicotinamidase	h2o[c] + ncam[c] -> nac[c] + nh4[c]			nicotinamidase	Nicotinate and nicotinamide metabolism	0	0	1000	0		3.5.1.19	BioCyc
NAMNPP	nicotinic acid mononucleotide pyrophosphorylase	atp[c] + h2o[c] + nac[c] + prpp[c] -> adp[c] + nicrnt[c] + pi[c] + ppi[c]			nicotinic acid mononucleotide pyrophosphorylase	Nicotinate and nicotinamide metabolism	0	0	1000	0		2.4.2.11	BioCyc
RNMNP	Nicotinamide ribonucleotide phosphohydrolase	nmn[c] + h2o[c] -> rnmn[c] + pi[c]	SurE (Zmob_0322)	Zmob_0322	5'-nucleotidase	Nicotinate and nicotinamide metabolism	0	0	1000	0		3.1.3.5	KEGG
NADS1	NAD synthase (nh3)	atp[c] + dnad[c] + nh4[c] -> amp[c] + h[c] + nad[c] + ppi[c]	NadE (Zmob_0404)	Zmob_0404	NAD+ synthetase	Nicotinate and nicotinamide metabolism	0	0	1000	0		6.3.1.5	KEGG
NNATr	nicotinate-nucleotide adenylyltransferase	atp[c] + h[c] + nicrnt[c] <=> dnad[c] + ppi[c]	NadD (Zmob_1477)	Zmob_1477	Nicotinate-nucleotide adenylyltransferase	Nicotinate and nicotinamide metabolism	1	-1000	1000	0		2.7.7.18	KEGG
NMNDA	nicotinamide-nucleotide amidase	h2o[c] + nmn[c] -> nh4[c] + nicrnt[c]		Zmob_0198	CinA domain-containing protein	Nicotinate and nicotinamide metabolism	0	0	1000	0		3.5.1.42	BioCyc
NNDPR	nicotinate-nucleotide diphosphorylase (carboxylating)	2 h[c] + prpp[c] + quln[c] -> co2[c] + nicrnt[c] + ppi[c]	NadC (Zmob_1296)	Zmob_1296	nicotinate-nucleotide pyrophosphorylase	Nicotinate and nicotinamide metabolism	0	0	1000	0		2.4.2.19	KEGG
NRNP	Nicotinate D-ribonucleotide phosphohydrolase	nicrnt[c] + h2o[c] -> nicrns[c] + pi[c]	SurE (Zmob_0322)	Zmob_0322	5'-nucleotidase	Nicotinate and nicotinamide metabolism	0	0	1000	0		3.1.3.5	KEGG
QULNS	quinolinate synthase	dhap[c] + iasp[c] -> 2 h2o[c] + pi[c] + quln[c]	NadA (Zmob_1295)	Zmob_1295	quinolinate synthetase	Nicotinate and nicotinamide metabolism	0	0	1000	0		2.5.1.72	KEGG
ASPO6	L-aspartate oxidase	asp-L[c] + o2[c] -> h[c] + h2o2[c] + iasp[c]	NadB (Zmob_0687)	Zmob_0687	L-aspartate oxidase	Nicotinate and nicotinamide metabolism	0	0	1000	0		1.4.3.16	KEGG
NADK	NAD kinase	atp[c] + nad[c] -> adp[c] + h[c] + nadp[c]	NadK (Zmob_0021)	Zmob_0021	ATP-NAD/AcoX kinase	Nicotinate and nicotinamide metabolism	0	0	1000	0		2.7.1.23	KEGG
NADN	NAD nucleosidase	h2o[c] + nad[c] -> adprib[c] + h[c] + ncam[c]			NAD nucleosidase	Nicotinate and nicotinamide metabolism	0	0	1000	0		3.2.2.5	BioCyc
NADPPPS	NADP phosphatase	h2o[c] + nadp[c] -> nad[c] + pi[c]				Nicotinate and nicotinamide metabolism	0	0	1000	0		3.1.3.-	BioCyc
MOHMT	3-methyl-2-oxobutanoate hydroxymethyltransferase	3mob[c] + h2o[c] + mlthf[c] -> 2dhp[c] + thf[c]	PanB (Zmob_1220)	Zmob_1220	3-methyl-2-oxobutanoate hydroxymethyltransferase	Pantothenate and CoA biosynthesis	0	0	1000	0		2.1.2.11	KEGG
DPR	2-dehydropantoate 2-reductase	2dhp[c] + h[c] + nadph[c] -> nadp[c] + pant-R[c]	IlvC (Zmob_0186)	Zmob_0186	2-dehydropantoate 2-reductase	Pantothenate and CoA biosynthesis	0	0	1000	0		1.1.1.169	BioCyc
PANTS	pantothenate synthase	ala-B[c] + atp[c] + pant-R[c] -> amp[c] + h[c] + pnto-R[c] + ppi[c]	PanC (Zmob_1219)	Zmob_1219	pantoate--beta-alanine ligase	Pantothenate and CoA biosynthesis	0	0	1000	0		6.3.2.1	KEGG
PNTK	pantothenate kinase	atp[c] + pnto-R[c] -> 4ppan[c] + adp[c] + h[c]	CoaX (Zmob_1299)	Zmob_1299	pantothenate kinase	Pantothenate and CoA biosynthesis	0	0	1000	0		2.7.1.33	KEGG
PPNCL2	phosphopantothenate-cysteine ligase	4ppan[c] + ctp[c] + cys-L[c] -> 4ppcys[c] + cmp[c] + h[c] + ppi[c]	Dfp (Zmob_0140)	Zmob_0140	phosphopantothenate--cysteine ligase	Pantothenate and CoA biosynthesis	0	0	1000	0		6.3.2.5	KEGG
PPCDC	phosphopantothenoylcysteine decarboxylase	4ppcys[c] + h[c] -> co2[c] + pan4p[c]	Dfp (Zmob_0140)	Zmob_0140	phosphopantothenate--cysteine ligase	Pantothenate and CoA biosynthesis	0	0	1000	0		4.1.1.36	KEGG
PTPATi	pantetheine-phosphate adenylyltransferase	atp[c] + h[c] + pan4p[c] -> dpcoa[c] + ppi[c]	CoaD (Zmob_0442)	Zmob_0442	pantetheine-phosphate adenylyltransferase	Pantothenate and CoA biosynthesis	0	0	1000	0		2.7.7.3	KEGG
DPCOAK	dephospho-CoA kinase	atp[c] + dpcoa[c] -> adp[c] + coa[c] + h[c]	CoaE (Zmob_0765)	Zmob_0765	dephospho-CoA kinase	Pantothenate and CoA biosynthesis	0	0	1000	0		2.7.1.24	KEGG
ACPS1	acyl-carrier protein synthase	coa[c] -> ACP[c] + h[c] + pap[c]	AcpS (Zmob_1431)	Zmob_1431	holo-[acyl-carrier protein] synthase	Pantothenate and CoA biosynthesis	0	0	1000	0		2.7.8.7	KEGG
ACPP	acyl carrier protein phosphodiesterase	ACP[c] + h2o[c] -> apoACP[c] + pan4p[c] + h[c]			acyl carrier protein phosphodiesterase	Pantothenate and CoA biosynthesis	0	0	1000	0		3.1.4.14	BioCyc
ASP1DC	aspartate 1-decarboxylase	asp-L[c] + h[c] -> ala-B[c] + co2[c]			aspartate 1-decarboxylase	Pantothenate and CoA biosynthesis	0	0	1000	0		4.1.1.11	BioCyc
MALCOAMT	Malonyl-CoA methyltransferase	amet[c] + malcoa[c] -> ahcys[c] + malcoame[c]	BioC (Zmob_1252)	Zmob_1252	malonyl-CoA O-methyltransferase	Biotin metabolism	0	0	1000	0		2.1.1.197	KEGG
OGMEACPS	3-Oxo-glutaryl-[ACP] methyl ester synthase	h[c] + malACP[c] + malcoame[c] -> co2[c] + coa[c] + ogmeACP[c]	FabF (Zmob_0064)	Zmob_0064	3-oxoacyl-(acyl-carrier-protein) synthase 2	Biotin metabolism	0	0	1000	0		2.3.1.179	KEGG
OGMEACPR	3-Oxo-glutaryl-[ACP] methyl ester reductase	h[c] + nadph[c] + ogmeACP[c] -> hgmeACP[c] + nadp[c]	FabG (Zmob_0122)	Zmob_0112	3-oxoacyl-[acyl-carrier protein] reductase	Biotin metabolism	0	0	1000	0		1.1.1.100	KEGG
OGMEACPD	3-Oxo-glutaryl-[ACP] methyl ester dehydratase	hgmeACP[c] -> egmeACP[c] + h2o[c]	FabZ (Zmob_0181)	Zmob_0181	beta-hydroxyacyl-(ACP) dehydratase FabZ	Biotin metabolism	0	0	1000	0		4.2.1.59	KEGG
EGMEACPR	Enoylglutaryl-[ACP] methyl ester reductase	egmeACP[c] + h[c] + nadph[c] -> gmeACP[c] + nadp[c]	FabI (Zmob_1448)	Zmob_1448	enoyl-[acyl-carrier protein] reductase I	Biotin metabolism	0	0	1000	0		1.3.1.10	KEGG
OPMEACPS	3-Oxo-pimeloyl-[ACP] methyl ester synthase	gmeACP[c] + h[c] + malACP[c] -> ACP[c] + co2[c] + opmeACP[c]	FabF (Zmob_0064)	Zmob_0064	3-oxoacyl-(acyl-carrier-protein) synthase 2	Biotin metabolism	0	0	1000	0		2.3.1.179	KEGG
OPMEACPR	3-Oxo-pimeloyl-[ACP] methyl ester reductase	h[c] + nadph[c] + opmeACP[c] -> hpmeACP[c] + nadp[c]	FabG (Zmob_0122)	Zmob_0112	3-oxoacyl-[acyl-carrier protein] reductase	Biotin metabolism	0	0	1000	0		1.1.1.100	KEGG
OPMEACPD	3-Oxo-pimeloyl-[ACP] methyl ester dehydratase	hpmeACP[c] -> epmeACP[c] + h2o[c]	FabZ (Zmob_0181)	Zmob_0181	beta-hydroxyacyl-(ACP) dehydratase FabZ	Biotin metabolism	0	0	1000	0		4.2.1.59	KEGG
EPMEACPR	Enoylpimeloyl-[ACP] methyl ester reductase	epmeACP[c] + h[c] + nadph[c] -> nadp[c] + pmeACP[c]	FabI (Zmob_1448)	Zmob_1448	enoyl-[acyl-carrier protein] reductase I	Biotin metabolism	0	0	1000	0		1.3.1.10	KEGG
PMEACPE	Pimeloyl-[ACP] methyl ester esterase	h2o[c] + pmeACP[c] -> meoh[c] + pimACP[c]	BioH (Zmob_1251)	Zmob_1251	pimeloyl-[acyl-carrier protein] methyl ester esterase	Biotin metabolism	0	0	1000	0		3.1.1.85	KEGG
AOXSr2	8-amino-7-oxononanoate synthase	ala-L[c] + pimACP[c] -> 8aonn[c] + ACP[c] + co2[c]	BioF (Zmob_0071 or Zmob_1250)	Zmob_0071 or Zmob_1250	8-amino-7-oxononanoate synthase	Biotin metabolism	0	0	1000	0		2.3.1.47	KEGG
AMAOTr	adenosylmethionine-8-amino-7-oxononanoate transaminase	8aonn[c] + amet[c] <=> amob[c] + dann[c]	BioA (Zmob_1249)	Zmob_1249	adenosylmethionine-8-amino-7-oxononanoate aminotransferase	Biotin metabolism	1	-1000	1000	0		2.6.1.62	KEGG
DBTS	dethiobiotin synthase	atp[c] + co2[c] + dann[c] -> adp[c] + dtbt[c] + 3 h[c] + pi[c]	BioD (Zmob_1252)	Zmob_1252	dethiobiotin synthetase	Biotin metabolism	0	0	1000	0		6.3.3.3	KEGG
BTS5	Biotin synthase	2fe2s[c] + amet[c] + dtbt[c] -> 2fe1s[c] + btn[c] + dad-5[c] + h[c] + met-L[c]		Zmob_0730	biotin synthase	Biotin metabolism	0	0	1000	0		2.8.1.6	[7]
LIPOS	Lipoate synthase	4fe4s[c] + 2 amet[c] + h[c] + nad[c] + octapb[c] -> 2fe2s[c] + 2 dad-5[c] + 2 fe2[c] + lipopb[c] + 2 met-L[c] + nadh[c]	LipA (Zmob_0195)	Zmob_0195	lipoic acid synthetase	Lipoic acid metabolism	0	0	1000	0		2.8.1.8	KEGG
LIPOCT	Lipoyl(octanoyl) transferase	h[c] + ocACP[c] -> ACP[c] + octapb[c]	LipB (Zmob_0047)	Zmob_0047	lipoate-protein ligase B	Lipoic acid metabolism	0	0	1000	0		2.3.1.181	KEGG
GTPCI	GTP cyclohydrolase I	gtp[c] + h2o[c] -> ahdt[c] + for[c] + h[c]	FolE (Zmob_0106)	Zmob_0106	GTP cyclohydrolase I	Folate biosynthesis	0	0	1000	0		3.5.4.16	KEGG
CPH4S	6-carboxy-5,6,7,8-tetrahydropterin synthase	ahdt[c] + h2o[c] -> acald[c] + cph4[c] + h[c] + pppi[c]	QueD (Zmob_0476)	Zmob_0476	6-carboxy-5,6,7,8-tetrahydropterin synthase	Folate biosynthesis	0	0	1000	0		4.2.1.50	KEGG
DNTPPA	Dihydroneopterin triphosphate pyrophosphatase	ahdt[c] + h2o[c] -> dhpmp[c] + h[c] + ppi[c]			Dihydroneopterin triphosphate pyrophosphatase	Folate biosynthesis	0	0	1000	0		3.6.1.-	BioCyc
DNMPPA	Dihydroneopterin monophosphate dephosphorylase	dhpmp[c] + h2o[c] -> dhnpt[c] + pi[c]			Dihydroneopterin monophosphate dephosphorylase	Folate biosynthesis	0	0	1000	0		3.6.1.-	BioCyc
DHNPA2r	dihydroneopterin aldolase reversible	dhnpt[c] <=> 6hmhpt[c] + gcald[c]	FolB (Zmob_0258)	Zmob_0258	dihydroneopterin aldolase	Folate biosynthesis	1	-1000	1000	0		4.1.2.25	KEGG
HPPK2	6-hydroxymethyl-dihydropterin pyrophosphokinase	6hmhpt[c] + atp[c] -> 6hmhptpp[c] + amp[c] + h[c]	FolK (Zmob_1493)	Zmob_1493	2-amino-4-hydroxy-6-hydroxymethyldihydropteridine pyrophosphokinase	Folate biosynthesis	0	0	1000	0		2.7.6.3	KEGG
DHPS2	dihydropteroate synthase	4abz[c] + 6hmhptpp[c] -> dhpt[c] + ppi[c]	FolP (Zmob_0304)	Zmob_0304	dihydropteroate synthase	Folate biosynthesis	0	0	1000	0		2.5.1.15	KEGG
DHFS	dihydrofolate synthase	atp[c] + dhpt[c] + glu-L[c] -> adp[c] + dhf[c] + h[c] + pi[c]	FolC (Zmob_1107)	Zmob_1107	dihydrofolate synthase / folylpolyglutamate synthase	Folate biosynthesis	0	0	1000	0		6.3.2.12	KEGG
DHFR	dihydrofolate reductase	dhf[c] + h[c] + nadph[c] <=> nadp[c] + thf[c]	FolA (Zmob_0869)	Zmob_0869	dihydrofolate reductase	Folate biosynthesis	1	-1000	1000	0		1.5.1.3	KEGG
ADCS	4-amino-4-deoxychorismate synthase	chor[c] + gln-L[c] -> 4adcho[c] + glu-L[c]	PabA (Zmob_0713) and PabB (Zmob_0714)	Zmob_0713 and Zmob_0714	glutamine amidotransferase of anthranilate synthase	Folate biosynthesis	0	0	1000	0		2.6.1.85	KEGG
ADCL	4-aminobenzoate synthase	4adcho[c] -> 4abz[c] + h[c] + pyr[c]	PabC (Zmob_0885)	Zmob_0885	4-amino-4-deoxychorismate lyase	Folate biosynthesis	0	0	1000	0		4.1.3.38	KEGG
PTHNS	6-pyruvoyl-tetrahydropterin synthase	ahdt[c] <=> pthn[c] + pppi[c]	QueD (Zmob_0476)	Zmob_0476	6-pyruvoyl-tetrahydropterin synthase	Folate biosynthesis	1	-1000	1000	0		4.2.3.12	KEGG
CDGS	7-deaza-7-carboxyguanine synthase	cph4[c] + h[c] -> cdg[c] + nh4[c]			7-deaza-7-carboxyguanine synthase	Folate biosynthesis	0	0	1000	0		4.3.99.3	[7]
CCGS	7-cyano-7-carbaguanine synthase	atp[c] + cdg[c] + nh4[c] -> adp[c] + h[c] + h2o[c] + pi[c] + preq0[c]	QueC (Zmob_0287)	Zmob_0287	7-cyano-7-deazaguanine synthase	Folate biosynthesis	0	0	1000	0		6.3.4.20	KEGG
CDGR	7-cyano-7-deazaguanine reductase	3 h[c] + 2 nadph[c] + preq0[c] -> 2 nadp[c] + preq1[c]	QueF (Zmob_0874)	Zmob_0874	7-cyano-7-deazaguanine reductase	Folate biosynthesis	0	0	1000	0		1.7.1.13	KEGG
GCALDD	Glycolaldehyde dehydrogenase	gcald[c] + h2o[c] + nad[c] -> glyclt[c] + 2 h[c] + nadh[c]				Folate biosynthesis	0	0	1000	0		1.2.1.21	[7]
FMETTRS	Methionyl-tRNA formyltransferase	10fthf[c] + mettrna[c] -> fmettrna[c] + h[c] + thf[c]	Fmt (Zmob_0481)	Zmob_0481	methionyl-tRNA formyltransferase	One carbon pool by folate	0	0	1000	0		2.1.2.9	KEGG
FTHFD	formyltetrahydrofolate deformylase	10fthf[c] + h2o[c] -> for[c] + h[c] + thf[c]	PurH (Zmob_0776)	Zmob_0776	phosphoribosylaminoimidazolecarboxamide formyltransferase	One carbon pool by folate	0	0	1000	0		3.5.1.10	BioCyc
FTHFLi	formate-tetrahydrofolate ligase	atp[c] + for[c] + thf[c] -> 10fthf[c] + adp[c] + pi[c]	Fhs (Zmob_0986)	Zmob_0986	formate-tetrahydrofolate ligase	One carbon pool by folate	0	0	1000	0		6.3.4.3	KEGG
MTHFC	methenyltetrahydrofolate cyclohydrolase	h2o[c] + methf[c] <=> 10fthf[c] + h[c]	FolD (Zmob_0390)	Zmob_0390	Methenyltetrahydrofolate cyclohydrolase	One carbon pool by folate	1	-1000	1000	0		3.5.4.9	KEGG
MTHFD	methylenetetrahydrofolate dehydrogenase (NADP)	mlthf[c] + nadp[c] <=> methf[c] + nadph[c]	FolD (Zmob_0390)	Zmob_0390	methylenetetrahydrofolate dehydrogenase (NADP+)	One carbon pool by folate	1	-1000	1000	0		1.5.1.5	KEGG
MTHFR2	5,10-methylenetetrahydrofolate reductase (NADH)	2 h[c] + mlthf[c] + nadh[c] -> 5mthf[c] + nad[c]	MetF (Zmob_1397)	Zmob_1397	5,10-methylenetetrahydrofolate reductase	One carbon pool by folate	0	0	1000	0		1.5.1.20	KEGG
FORTHFi	5-formyltetrahydrofolate cyclo-ligase	5fthf[c] + atp[c] -> methf[c] + adp[c] + pi[c]		Zmob_0626	5-formyltetrahydrofolate cyclo-ligase	One carbon pool by folate	0	0	1000	0		6.3.3.2	KEGG
THFAT	Tetrahydrofolate aminomethyltransferase	h2o[c] + methf[c] -> 5fthf[c] + h[c]	GlyA (Zmob_0130)	Zmob_0130	glycine hydroxymethyltransferase	One carbon pool by folate	0	0	1000	0		2.1.2.10	[7]
GLUTRR	glutamyl-tRNA reductase	glutrna[c] + h[c] + nadph[c] -> glu1sa[c] + nadp[c] + trnaglu[c]			glutamyl-tRNA reductase	Porphyrin and chlorophyll metabolism	0	0	1000	0		1.2.1.70	BioCyc
G1SAT	glutamate-1-semialdehyde aminotransferase	glu1sa[c] <=> 5aop[c]	HemL (Zmob_0944)	Zmob_0944	glutamate-1-semialdehyde aminotransferase	Porphyrin and chlorophyll metabolism	1	-1000	1000	0		5.4.3.8	BioCyc
PPBNGS	porphobilinogen synthase	2 5aop[c] -> h[c] + 2 h2o[c] + ppbng[c]	HemB (Zmob_1287)	Zmob_1287	porphobilinogen synthase	Porphyrin and chlorophyll metabolism	0	0	1000	0		4.2.1.24	KEGG
HMBS	hydroxymethylbilane synthase	h2o[c] + 4 ppbng[c] -> hmbil[c] + 4 nh4[c]	HemC (Zmob_1266)	Zmob_1266	porphobilinogen deaminase	Porphyrin and chlorophyll metabolism	0	0	1000	0		2.5.1.61	KEGG
UPP3S	uroporphyrinogen-III synthase	hmbil[c] -> h2o[c] + uppg3[c]	HemD (Zmob_1267)	Zmob_1267	uroporphyrinogen-III synthase	Porphyrin and chlorophyll metabolism	0	0	1000	0		4.2.1.75	KEGG
UPPDC3	uroporphyrinogen decarboxylase (uroporphyrinogen III)	4 h[c] + uppg3[c] -> 4 co2[c] + cpppg3[c]	HemE (Zmob_1199)	Zmob_1199	uroporphyrinogen decarboxylase	Porphyrin and chlorophyll metabolism	0	0	1000	0		4.1.1.37	KEGG
CPPPGO	coproporphyrinogen oxidase (O2 required)	cpppg3[c] + 2 h[c] + o2[c] -> 2 co2[c] + 2 h2o[c] + pppg9[c]	HemF (Zmob_0354)	Zmob_0354	coproporphyrinogen oxidase	Porphyrin and chlorophyll metabolism	0	0	1000	0		1.3.3.3	KEGG
CPPPGO2	Oxygen Independent coproporphyrinogen-III oxidase	2 amet[c] + cpppg3[c] -> 2 co2[c] + 2 dad-5[c] + 2 met-L[c] + pppg9[c]	HemN (Zmob_1186 or Zmob_1736)	Zmob_1186 or Zmob_1736	oxygen-independent coproporphyrinogen III oxidase	Porphyrin and chlorophyll metabolism	0	0	1000	0		1.3.99.22	KEGG
PPPGO	protoporphyrinogen oxidase (aerobic)	1.5 o2[c] + pppg9[c] -> 3 h2o[c] + ppp9[c]			protoporphyrinogen oxidase	Porphyrin and chlorophyll metabolism	0	0	1000	0		1.3.3.4	BioCyc
PPPGO3	protoporphyrinogen oxidase (anaerobic)	3 fum[c] + pppg9[c] -> ppp9[c] + 3 succ[c]			protoporphyrinogen oxidase	Porphyrin and chlorophyll metabolism	0	0	1000	0		1.3.3.4	BioCyc
FCLT	Ferrochelatase	fe2[c] + ppp9[c] -> 2 h[c] + pheme[c]	HemH (Zmob_0857)	Zmob_0857	ferrochelatase	Porphyrin and chlorophyll metabolism	0	0	1000	0		4.99.1.1	KEGG
UPP3MT	uroporphyrinogen methyltransferase	2 amet[c] + uppg3[c] -> 2 ahcys[c] + dscl[c] + h[c]	CobA (Zmob_0070) or CysG (Zmob_1193)	Zmob_0070 or Zmob_1193	uroporphyrin-III C-methyltransferase	Porphyrin and chlorophyll metabolism	0	0	1000	0		2.1.1.107	KEGG
SHCHD2	sirohydrochlorin dehydrogenase (NAD)	dscl[c] + nad[c] -> h[c] + nadh[c] + scl[c]	CysG (Zmob_1193)	Zmob_1193	uroporphyrin-III C-methyltransferase	Porphyrin and chlorophyll metabolism	0	0	1000	0		1.3.1.76	KEGG
SHCHF	sirohydrochlorin ferrochelatase	fe2[c] + scl[c] -> 3 h[c] + sheme[c]	CysG (Zmob_1193)	Zmob_1193	uroporphyrin-III C-methyltransferase	Porphyrin and chlorophyll metabolism	0	0	1000	0		4.99.1.4	KEGG
UPP1S	uroporphyrinogen-I synthase	hmbil[c] + 8 h[c] -> h2o[c] + uppg1[c]	SPONTANEOUS		SPONTANEOUS	Porphyrin and chlorophyll metabolism	0	0	1000	0			KEGG
UPPDC1	uroporphyrinogen decarboxylase (uroporphyrinogen I)	uppg1[c] <=> 4 co2[c] + cpppg1[c] + 4 h[c]	HemE (Zmob_1199)	Zmob_1199	uroporphyrinogen decarboxylase	Porphyrin and chlorophyll metabolism	0	0	1000	0		4.1.1.37	KEGG
CHRPL	Chorismate pyruvate lyase	chor[c] -> 4hbz[c] + pyr[c]				Ubiquinone and other terpenoid-quinone biosynthesis	0	0	1000	0			[7]
HBZOPT	Hydroxybenzoate octaprenyltransferase	4hbz[c] + octdp[c] -> 3ophb[c] + ppi[c]	UbiA (Zmob_1689)	Zmob_1689	4-hydroxybenzoate polyprenyltransferase	Ubiquinone and other terpenoid-quinone biosynthesis	0	0	1000	0		2.5.1.-	KEGG
OPHBDC	Octaprenyl-hydroxybenzoate decarboxylase	3ophb[c] + h[c] -> 2oph[c] + co2[c]			Octaprenyl-hydroxybenzoate decarboxylase	Ubiquinone and other terpenoid-quinone biosynthesis	0	0	1000	0		4.1.1.-	BioCyc
OPHHX	2-Octaprenylphenol hydroxylase	2oph[c] + 0.5 o2[c] -> 2ohph[c]	UbiB (Zmob_0141)	Zmob_0141	2-polyprenylphenol 6-hydroxylase	Ubiquinone and other terpenoid-quinone biosynthesis	0	0	1000	0			KEGG
OPHHX3	2-Octaprenylphenol hydroxylase (anaerobic)	2oph[c] + 2 atp[c] + 3 h2o[c] + nad[c] -> 2ohph[c] + 2 adp[c] + 3 h[c] + nadh[c] + 2 pi[c]				Ubiquinone and other terpenoid-quinone biosynthesis	0	0	1000	0			[7]
OHPHM	2-octaprenyl-6-hydroxyphenol methylase	2ohph[c] + amet[c] -> 2omph[c] + ahcys[c] + h[c]	UbiG (Zmob_1485)	Zmob_1485	ubiquinone biosynthesis O-methyltransferase	Ubiquinone and other terpenoid-quinone biosynthesis	0	0	1000	0		2.1.1.222	KEGG
OMPHHX	2-octaprenyl-6-methoxyphenol hydroxylase	2omph[c] + 0.5 o2[c] -> 2ombzl[c]	UbiH (Zmob_1436)	Zmob_1436	2-octaprenyl-6-methoxyphenol hydroxylase	Ubiquinone and other terpenoid-quinone biosynthesis	0	0	1000	0		1.14.13.-	KEGG
OMPHHX3	2-octaprenyl-6-methoxyphenol hydroxylase (anaerobic)	2omph[c] + 2 atp[c] + 3 h2o[c] + nad[c] -> 2ombzl[c] + 2 adp[c] + 3 h[c] + nadh[c] + 2 pi[c]				Ubiquinone and other terpenoid-quinone biosynthesis	0	0	1000	0			[7]
OMBZLM	2-Octaprenyl-6-methoxy-benzoquinol methylase	2ombzl[c] + amet[c] -> 2ommbl[c] + ahcys[c] + h[c]	UbiE (Zmob_0142)	Zmob_0142	ubiquinone/menaquinone biosynthesis methyltransferase	Ubiquinone and other terpenoid-quinone biosynthesis	0	0	1000	0		2.1.1.201	KEGG
OMMBLHX	2-Octaprenyl-3-methyl-6-methoxy-1,4-benzoquinol hydroxylase	2ommbl[c] + 0.5 o2[c] -> 2omhmbl[c]	Coq7 (Zmob_1471)	Zmob_1471	Ubiquinone biosynthesis protein COQ7	Ubiquinone and other terpenoid-quinone biosynthesis	0	0	1000	0		1.14.13.-	KEGG
OMMBLHX3	2-Octaprenyl-3-methyl-6-methoxy-1,4-benzoquinol hydroxylase (anaerobic)	2ommbl[c] + 2 atp[c] + 3 h2o[c] + nad[c] -> 2omhmbl[c] + 2 adp[c] + 3 h[c] + nadh[c] + 2 pi[c]				Ubiquinone and other terpenoid-quinone biosynthesis	0	0	1000	0			[7]
DMQMT	3-Dimethylubiquinonol 3-methyltransferase	2omhmbl[c] + amet[c] -> ahcys[c] + h[c] + q10h2[c]	UbiG (Zmob_1485)	Zmob_1485	ubiquinone biosynthesis O-methyltransferase	Ubiquinone and other terpenoid-quinone biosynthesis	0	0	1000	0		2.1.1.64	KEGG
AMMQLT8	S-adenosylmethione:2-demthylmenaquinole methyltransferase (menaquinone 8)	2dmmql8[c] + amet[c] -> ahcys[c] + h[c] + mql8[c]	UbiE (Zmob_0142)	Zmob_0142	menaquinone biosynthesis methyltransferase	Ubiquinone and other terpenoid-quinone biosynthesis	0	0	1000	0		2.1.1.163	KEGG
DXPRIi	1-deoxy-D-xylulose reductoisomerase	dxyl5p[c] + h[c] + nadph[c] -> 2me4p[c] + nadp[c]	Dxr (Zmob_0177)	Zmob_0177	1-deoxy-D-xylulose-5-phosphate reductoisomerase	Terpenoid backbone biosynthesis	0	0	1000	0		1.1.1.267	KEGG
MEPCT	2-C-methyl-D-erythritol 4-phosphate cytidylyltransferase	2me4p[c] + ctp[c] + h[c] -> 4c2me[c] + ppi[c]	IspDF (Zmob_0200)	Zmob_0200	2-C-methyl-D-erythritol 4-phosphate cytidylyltransferase	Terpenoid backbone biosynthesis	0	0	1000	0		2.7.7.60	KEGG
CDPMEK	4-(cytidine 5'-diphospho)-2-C-methyl-D-erythritol kinase	4c2me[c] + atp[c] -> 2p4c2me[c] + adp[c] + h[c]	IspE (Zmob_0148)	Zmob_0148	4-diphosphocytidyl-2-C-methyl-D-erythritol kinase	Terpenoid backbone biosynthesis	0	0	1000	0		2.7.1.148	KEGG
MECDPS	2-C-methyl-D-erythritol 2,4-cyclodiphosphate synthase	2p4c2me[c] -> 2mecdp[c] + cmp[c]	IspDF (Zmob_0200)	Zmob_0200	2-C-methyl-D-erythritol 2,4-cyclodiphosphate synthase	Terpenoid backbone biosynthesis	0	0	1000	0		4.6.1.12	KEGG
MECDPDH5	2C-methyl-D-erythritol 2,4 cyclodiphosphate dehydratase	2mecdp[c] + nadph[c] -> nadp[c] + h2mb4p[c] + h2o[c]	IspG (Zmob_0658)	Zmob_0658	1-hydroxy-2-methyl-2-(E)-butenyl 4-diphosphate synthase	Terpenoid backbone biosynthesis	0	0	1000	0		1.17.7.1	KEGG
DMPPS	1-hydroxy-2-methyl-2-(E)-butenyl 4-diphosphate reductase (dmpp)	h[c] + h2mb4p[c] + nadh[c] -> dmpp[c] + h2o[c] + nad[c]	LytB (Zmob_0422)	Zmob_0422	hydroxymethylbutenyl pyrophosphate reductase	Terpenoid backbone biosynthesis	0	0	1000	0		1.17.1.2	KEGG
IPDPS	1-hydroxy-2-methyl-2-(E)-butenyl 4-diphosphate reductase (ipdp)	h[c] + h2mb4p[c] + nadh[c] -> h2o[c] + ipdp[c] + nad[c]	LytB (Zmob_0422)	Zmob_0422	hydroxymethylbutenyl pyrophosphate reductase	Terpenoid backbone biosynthesis	0	0	1000	0		1.17.1.2	KEGG
IPDDI		ipdp[c] <=> dmpp[c]			isopentenyl-diphosphate D-isomerase	Terpenoid backbone biosynthesis	1	-1000	1000	0		5.3.3.2	BioCyc
DMATT	dimethylallyltranstransferase	dmpp[c] + ipdp[c] -> grdp[c] + ppi[c]	IspA (Zmob_0441)	Zmob_0441	polyprenyl synthetase	Terpenoid backbone biosynthesis	0	0	1000	0		2.5.1.1	KEGG
GRTT	geranyltranstransferase	grdp[c] + ipdp[c] -> frdp[c] + ppi[c]	IspA (Zmob_0441)	Zmob_0441	polyprenyl synthetase	Terpenoid backbone biosynthesis	0	0	1000	0		2.5.1.10	KEGG
OCTDPS	Octaprenyl pyrophosphate synthase	frdp[c] + 5 ipdp[c] -> octdp[c] + 5 ppi[c]	IspB (Zmob_1089)	Zmob_1089	octaprenyl-diphosphate synthase	Terpenoid backbone biosynthesis	0	0	1000	0		2.5.1.90	KEGG
UDCPDPS	Undecaprenyl diphosphate synthase	frdp[c] + 8 ipdp[c] -> 8 ppi[c] + udcpdp[c]	UppS (Zmob_0175)	Zmob_0175	undecaprenyl diphosphate synthase	Terpenoid backbone biosynthesis	0	0	1000	0		2.5.1.31	KEGG
SQLS	Squalene synthase	2 frdp[c] + nadph[c] + h[c] -> sql[c] + nadp[c] + 2 ppi[c]		Zmob_0428	Squalene synthase	Steroid biosynthesis	0	0	1000	0		2.5.1.21	KEGG
SQLC	squalene-hopene cyclase	sql[c] -> hopen[c]	Shc (Zmob_0425 or Zmob_1582)	Zmob_0425 or Zmob_1582	Squalene cyclase	Sesquiterpenoid and triterpenoid biosynthesis	0	0	1000	0		5.4.99.17	KEGG
SQLM	squalene mutase	sql[c] + h2o[c] -> hopanol[c]	Shc (Zmob_0425 or Zmob_1582)	Zmob_0425 or Zmob_1583	squalene mutase	Sesquiterpenoid and triterpenoid biosynthesis	0	0	1000	0		4.2.1.129	KEGG
AHOPS	adenosyl hopane synthase	hopen[c] + amet[c] + h[c] -> ahopan[c] + met-L[c]				Sesquiterpenoid and triterpenoid biosynthesis	0	0	1000	0			[9]
RHOPS	ribosyl hopane synthase	ahopan[c] + h2o[c] -> rhopan[c] + ade[c]				Sesquiterpenoid and triterpenoid biosynthesis	0	0	1000	0			[9]
RHOPI	ribosyl hopane isomerase	rhopan[c] <=> fhopan[c]				Sesquiterpenoid and triterpenoid biosynthesis	1	-1000	1000	0			[9]
THBHS	Tetrahydroxybacteriohopanetetrol synthase	fhopan + q10h2[c] -> thbh[c] + q10[c]				Sesquiterpenoid and triterpenoid biosynthesis	0	0	1000	0			[9]
UAGDA	UDP-N-acetyl-D-glucosamine deacetylase	h2o[c] + uacgam[c] -> ac[c] + ugam[c] + h[c]				Sesquiterpenoid and triterpenoid biosynthesis	0	0	1000	0			[10]
UGGT	UDP-D-glucosamine glycosyltransferase	ugam[c] + thbh[c] -> thbhga[c] + udp[c] + h[c]				Sesquiterpenoid and triterpenoid biosynthesis	0	0	1000	0			[10]
THGC	Tetrahydroxybacteriohopane-glucosamine cyclase	thbhga[c] <=> thbhet[c]				Sesquiterpenoid and triterpenoid biosynthesis	1	-1000	1000	0			[10]
G1PTT	glucose-1-phosphate thymidylyltransferase	dttp[c] + g1p[c] + h[c] -> dtdpglu[c] + ppi[c]	RfbA (Zmob_1658)	Zmob_1658	glucose-1-phosphate thymidylyltransferas	Polyketide sugar unit biosynthesis	0	0	1000	0		2.7.7.24	KEGG
TDPGDH	dTDPglucose 4,6-dehydratase	dtdpglu[c] -> dtdp4d6dg[c] + h2o[c]	RfbB (Zmob_1659)	Zmob_1659	dTDP-glucose 4,6-dehydratase	Polyketide sugar unit biosynthesis	0	0	1000	0		4.2.1.46	KEGG
TDPDRE	dTDP-4-dehydrorhamnose 3,5-epimerase	dtdp4d6dg[c] -> dtdp4d6dm[c]	RfbC (Zmob_1657)	Zmob_1657	dTDP-4-dehydrorhamnose 3,5-epimerase	Polyketide sugar unit biosynthesis	0	0	1000	0		5.1.3.13	KEGG
TDPDRR	dTDP-4-dehydrorhamnose reductase	dtdp4d6dm[c] + h[c] + nadph[c] -> dtdprmn[c] + nadp[c]	RfbD (Zmob_1656)	Zmob_1656	dTDP-4-dehydrorhamnose reductase	Polyketide sugar unit biosynthesis	0	0	1000	0		1.1.1.133	KEGG
VANOX	vanillate:oxygen oxidoreductase	van[c] + o2[c] + nadh[c] + h[c] -> 34dhb[c] + nad[c] + h2o[c] + fald[c]	VanB(Zmob_0987)	Zmob_0987	vanillate monooxygenase	Aminobenzoate degradation	0	0	1000	0		1.14.13.82	KEGG
ALATRS	Alanyl-tRNA synthetase	ala-L[c] + atp[c] + trnaala[c] -> alatrna[c] + amp[c] + ppi[c]	AlaS (Zmob_0451)	Zmob_0451	Alanyl-tRNA synthetase	Aminoacyl-tRNA biosynthesis	0	0	1000	0		6.1.1.7	KEGG
ARGTRS	Arginyl-tRNA synthetase	arg-L[c] + atp[c] + trnaarg[c] -> amp[c] + argtrna[c] + ppi[c]	ArgS (Zmob_0453)	Zmob_0453	Arginyl-tRNA synthetase	Aminoacyl-tRNA biosynthesis	0	0	1000	0		6.1.1.9	KEGG
ASPTRS	Aspartyl-tRNA synthetase	asp-L[c] + atp[c] + trnaasp[c] -> amp[c] + asptrna[c] + ppi[c]	AspS (Zmob_0570)	Zmob_0570	Aspartyl-tRNA synthetase	Aminoacyl-tRNA biosynthesis	0	0	1000	0		6.1.1.12	KEGG
GLNTA	glutamyl-tRNA(Gln) amidotransferase	asptrna[c] + gln-L[c] + atp[c] + h2o[c] -> asntrna[c] + glu-L[c] + adp[c] + pi[c] + 2 h[c]	GatA (Zmob_0508) and GatB (Zmob_0509) and GatC (Zmob_0507)	Zmob_0508 and Zmob_0509 and Zmob_0507	glutamyl-tRNA(Gln) amidotransferase	Aminoacyl-tRNA biosynthesis	0	0	1000	0		6.3.5.6	KEGG
ASNTH	peptidyl-tRNA hydrolase	asntrna[c] + h2o[c] -> asn-L[c] + trnaasn[c] + 2 h[c]	Pth (Zmob_1257)	Zmob_1257	peptidyl-tRNA hydrolase	Aminoacyl-tRNA biosynthesis	0	0	1000	0		3.1.1.29	KEGG
CYSTRS	Cysteinyl-tRNA synthetase	atp[c] + cys-L[c] + trnacys[c] -> amp[c] + cystrna[c] + ppi[c]	CysS (Zmob_0654)	Zmob_0654	Cysteinyl-tRNA synthetase	Aminoacyl-tRNA biosynthesis	0	0	1000	0		6.1.1.16	KEGG
GLNTRS	Glutaminyl-tRNA synthetase	atp[c] + gln-L[c] + trnagln[c] -> amp[c] + glntrna[c] + ppi[c]	GlnS (Zmob_1228)	Zmob_1228	Glutaminyl-tRNA synthetase	Aminoacyl-tRNA biosynthesis	0	0	1000	0		6.1.1.18	KEGG
GLUTRS	Glutamyl-tRNA synthetase	atp[c] + glu-L[c] + trnaglu[c] -> amp[c] + glutrna[c] + ppi[c]	GltX (Zmob_0403 or Zmob_1228)	Zmob_0403 or Zmob_1228	glutamyl-tRNA synthetase	Aminoacyl-tRNA biosynthesis	0	0	1000	0		6.1.1.17	KEGG
GLYTRS	Glycyl-tRNA synthetase	atp[c] + gly[c] + trnagly[c] -> amp[c] + glytrna[c] + ppi[c]	GlyQ (Zmob_1664) and GlyS (Zmob_1665)	Zmob_1664 and Zmob_1665	Glycyl-tRNA synthetase	Aminoacyl-tRNA biosynthesis	0	0	1000	0		6.1.1.14	KEGG
HISTRS	Histidyl-tRNA synthetase	atp[c] + his-L[c] + trnahis[c] -> amp[c] + histrna[c] + ppi[c]	HisS (Zmob_1614)	Zmob_1614	Histidyl-tRNA synthetase	Aminoacyl-tRNA biosynthesis	0	0	1000	0		6.1.1.21	KEGG
ILETRS	Isoleucyl-tRNA synthetase	atp[c] + ile-L[c] + trnaile[c] -> amp[c] + iletrna[c] + ppi[c]	IleS (Zmob_0871)	Zmob_0871	Isoleucyl-tRNA synthetase	Aminoacyl-tRNA biosynthesis	0	0	1000	0		6.1.1.5	KEGG
LEUTRS	Leucyl-tRNA synthetase	atp[c] + leu-L[c] + trnaleu[c] -> amp[c] + leutrna[c] + ppi[c]	LeuS (Zmob_1674)	Zmob_1674	Leucyl-tRNA synthetase	Aminoacyl-tRNA biosynthesis	0	0	1000	0		6.1.1.4	KEGG
LYSTRS	Lysyl-tRNA synthetase	atp[c] + lys-L[c] + trnalys[c] -> amp[c] + lystrna[c] + ppi[c]	LysK (Zmob_0410)	Zmob_0410	Lysyl-tRNA synthetase	Aminoacyl-tRNA biosynthesis	0	0	1000	0		6.1.1.6	KEGG
METTRS	Methionyl-tRNA synthetase	atp[c] + met-L[c] + trnamet[c] -> amp[c] + mettrna[c] + ppi[c]	MetG (Zmob_0228)	Zmob_0228	methionyl-tRNA synthetase	Aminoacyl-tRNA biosynthesis	0	0	1000	0		6.1.1.10	KEGG
PHETRS	Phenylalanyl-tRNA synthetase	atp[c] + phe-L[c] + trnaphe[c] -> amp[c] + phetrna[c] + ppi[c]	PheS (Zmob_1608)	Zmob_1608	Phenylalanyl-tRNA synthetase	Aminoacyl-tRNA biosynthesis	0	0	1000	0		6.1.1.20	KEGG
PROTRS	Prolyl-tRNA synthetase	atp[c] + pro-L[c] + trnapro[c] -> amp[c] + ppi[c] + protrna[c]	ProS (Zmob_0991)	Zmob_0991	Prolyl-tRNA synthetase	Aminoacyl-tRNA biosynthesis	0	0	1000	0		6.1.1.15	KEGG
SERTRS	Seryl-tRNA synthetase	atp[c] + ser-L[c] + trnaser[c] -> amp[c] + ppi[c] + sertrna[c]	SerS (Zmob_0321)	Zmob_0321	Seryl-tRNA synthetase	Aminoacyl-tRNA biosynthesis	0	0	1000	0		6.1.1.11	KEGG
SERTRS2	Seryl-tRNA synthetase (selenocystein)	atp[c] + ser-L[c] + trnasecys[c] -> amp[c] + ppi[c] + sertrna[sec][c]	SerS (Zmob_0321)	Zmob_0321	Seryl-tRNA synthetase	Aminoacyl-tRNA biosynthesis	0	0	1000	0		6.1.1.11	KEGG
THRTRS	Threonyl-tRNA synthetase	atp[c] + thr-L[c] + trnathr[c] -> amp[c] + ppi[c] + thrtrna[c]	ThrS (Zmob_0523)	Zmob_0523	Threonyl-tRNA synthetase	Aminoacyl-tRNA biosynthesis	0	0	1000	0		6.1.1.3	KEGG
TRPTRS	Tryptophanyl-tRNA synthetase	atp[c] + trnatrp[c] + trp-L[c] -> amp[c] + ppi[c] + trptrna[c]	TrpS (Zmob_1499)	Zmob_1499	Tryptophanyl-tRNA synthetase	Aminoacyl-tRNA biosynthesis	0	0	1000	0		6.1.1.2	KEGG
TYRTRS	tyrosyl-tRNA synthetase	atp[c] + trnatyr[c] + tyr-L[c] -> amp[c] + ppi[c] + tyrtrna[c]	TyrS (Zmob_1496)	Zmob_1496	tyrosyl-tRNA synthetase	Aminoacyl-tRNA biosynthesis	0	0	1000	0		6.1.1.1	KEGG
VALTRS	Valyl-tRNA synthetase	atp[c] + trnaval[c] + val-L[c] -> amp[c] + ppi[c] + valtrna[c]	ValS (Zmob_1288)	Zmob_1288	Valyl-tRNA synthetase	Aminoacyl-tRNA biosynthesis	0	0	1000	0		6.1.1.9	KEGG
protein		2.144 ala-L[c] + 0.371 arg-L[c] + 0.435 asn-L[c] + 0.435 asp-L[c] + 0.037 cys-L[c] + 0.308 gln-L[c] + 0.307 glu-L[c] + 0.146 his-L[c] + 0.672 ile-L[c] + 0.672 leu-L[c] + 0.447 lys-L[c] + 0.145 met-L[c] + 0.019 phe-L[c] + 0.391 pro-L[c] + 0.383 ser-L[c] + 0.415 thr-L[c] + 0.093 trp-L[c] + 0.122 tyr-L[c] + 1.057 val-L[c] + 44.92 atp[c] -> 44.92 adp[c] + 44.92 pi[c] + protein[c]					0	0	1000	0			[6]
DNA		0.869 datp[c] + 0.75 dctp[c] + 0.869 dttp[c] + 0.75 dgtp[c] + 4.4 atp[c] -> 4.4 adp[c] + 4.4 pi[c] + 3.237 ppi[c] + DNA[c]					0	0	1000	0			[6]
RNA		0.926 gtp[c] + 0.734 ctp[c] + 0.774 utp[c] + 1.906 atp[c] -> 1.24 adp[c] + 1.24 pi[c] + 3.1 ppi[c] + RNA[c]					0	0	1000	1			[6]
small molecules		0.167 nad[c] + 0.149 nadp[c] + 0.145 coa[c] + 0.01 ACP[c] + 1.26 ptrc[c] + 0.765 spmd[c] + 0.249 thf[c] + 0.243 fmn[c] + 0.141 fad[c] -> smallmolecules[c]					0	0	1000	0			[6]
phospholipid		0.01 clpn181[c] + 0.0016 clpn140[c] + 0.00148 clpn160[c] + 0.0003 clpn161[c] + 0.2 pg181[c] + 0.03 pg140[c] + 0.028 pg160[c] + 0.0056 pg161[c] + 0.64 pe181[c] + 0.096 pe140[c] + 0.088 pe160[c] + 0.018 pe161[c] + 0.065 1agpe181[c] + 0.0094 1agpe140[c] + 0.0088 1agpe160[c] + 0.0018 1agpe161[c] + 0.129 pc181[c] + 0.019 pc140[c] + 0.018 pc160[c] + 0.0036 pc161[c] -> phospholipid[c]					0	0	1000	0			[6]
hapnoid		0.11 thbh[c] + 0.692 thbhga[c] + 0.579 thbhet[c] + 0.07 hopanol[c] + 0.024 hopen[c] -> hapnoid[c]					0	0	1000	0			[6]
biomass		0.195 RNA[c] + 0.027 DNA[c] + 0.605 protein[c] + 0.053 phospholipid[c] + 0.025 uaagmda[c] + 0.025 glycogen[c] + 0.038 smallmolecules[c] + 16.45 atp[c] + 0.028 hapnoid[c] + 0.00193 ttdca[c] + 0.001875 hdca[c] + 0.0011 hdcea[c] + 0.00014 ocdca[c] + 0.0098 ocdcea[c] -> biomass[e] + 16.45 adp[c] + 16.45 pi[c]					0	0	1000	0			[6]
ATPM	ATP maintenance requirement	atp[c] + h2o[c] -> adp[c] + h[c] + pi[c]				Unassigned	0	3.89	1000	0			[11]
EX_biomass		biomass[e] <=>				Exchange	0	0	1000	0
EX_ac(e)	Acetate exchange	ac[e] <=>				Exchange	1	0	1000	0
EX_acald(e)	Acetaldehyde exchange	acald[e] <=>				Exchange	1	0	1000	0
EX_co2(e)	CO2 exchange	co2[e] <=>				Exchange	1	0	1000	0
EX_etoh(e)	Ethanol exchange	etoh[e] <=>				Exchange	1	0	1000	0
EX_for(e)	Formate exchange	for[e] <=>				Exchange	1	0	1000	0
EX_fru(e)	D-Fructose exchange	fru[e] <=>				Exchange	1	0	1000	0
EX_fum(e)	Fumarate exchange	fum[e] <=>				Exchange	1	0	1000	0
EX_glc(e)	D-Glucose exchange	glc-D[e] <=>				Exchange	1	-10	1000	0
EX_glyc(e)	Glycerol exchange	glyc[e] <=>				Exchange	1	0	1000	0
EX_h(e)	H+ exchange	h[e] <=>				Exchange	1	-1000	1000	0
EX_h2(e)	H2 exchange	h2[e] <=>				Exchange	1	-1000	1000	0
EX_h2o(e)	H2O exchange	h2o[e] <=>				Exchange	1	-1000	1000	0
EX_k(e)	K+ exchange	k[e] <=>				Exchange	1	-1000	1000	0
EX_lac-D(e)	D-lactate exchange	lac-D[e] <=>				Exchange	1	0	1000	0
EX_mal-L(e)	D-Malate exchange	mal-L[e] <=>				Exchange	1	0	1000	0
EX_na1(e)	Sodium exchange	na1[e] <=>				Exchange	1	-1000	1000	0
EX_nh4(e)	Ammonia exchange	nh4[e] <=>				Exchange	1	-1000	1000	0
EX_o2(e)	O2 exchange	o2[e] <=>				Exchange	1	-1000	0	0
EX_pi(e)	Phosphate exchange	pi[e] <=>				Exchange	1	-1000	1000	0
EX_pnto-R(e)	(R)-Pantothenate exchange	pnto-R[e] <=>				Exchange	1	0	1000	0
EX_sbt(e)	D-Sorbitol exchange	sbt[e] <=>				Exchange	1	0	1000	0
EX_so4(e)	Sulfate exchange	so4[e] <=>				Exchange	1	-1000	1000	0
EX_succ(e)	Succinate exchange	succ[e] <=>				Exchange	1	0	1000	0
EX_cu2(e)	Cu2+ exchange	cu2[e] <=>				Exchange	1	-1000	1000	0
EX_mnl(e)	D_Mannitol exchange	mnl[e] <=>				Exchange	1	0	1000	0
EX_sucr(e)	Sucrose exchange	sucr[e] <=>				Exchange	1	0	1000	0
EX_dha(e)	Dihydroxyacetone exchange	dha[e] <=>				Exchange	1	0	1000	0
EX_actin(e)	Acetoin exchange	actin[e] <=>				Exchange	1	0	1000	0
EX_mg2(e)	magnesium exchange	mg2[e] <=>				Exchange	1	0	1000	0
EX_fe2(e)	iron (II) exchange	fe2[e] <=>				Exchange	1	0	1000	0
EX_glcn(e)	D-Gluconate exchange	glcn[e] <=>				Exchange	1	0	1000	0
EX_no3(e)	Nitrate exchange	no3[e] <=>				Exchange	1	0	1000	0
EX_lev2(e)	Levan exchange	lev2[e] <=>				Exchange	0	0	1000	0
EX_5mtr(e)	5-Methylthio-D-ribose exchange	5mtr[e] <=>				Exchange	1	0	1000	0
EX_adn(e)	Adenosine exchange	adn[e] <=>				Exchange	1	0	1000	0
EX_ala-L(e)	L-Alanine exchange	ala-L[e] <=>				Exchange	1	0	1000	0
EX_arg-L(e)	L-Arginine exchange	arg-L[e] <=>				Exchange	1	0	1000	0
EX_gln-L(e)	L-Glutamine exchange	gln-L[e] <=>				Exchange	1	0	1000	0
EX_glu-L(e)	L-Glutamate exchange	glu-L[e] <=>				Exchange	1	0	1000	0
EX_gly(e)	Glycine exchange	gly[e] <=>				Exchange	1	0	1000	0
EX_gua(e)	Guanine exchange	gua[e] <=>				Exchange	1	0	1000	0
EX_his-L(e)	L-Histidine exchange	his-L[e] <=>				Exchange	1	0	1000	0
EX_ile-L(e)	L-Isoleucine exchange	ile-L[e] <=>				Exchange	1	0	1000	0
EX_ins(e)	Inosine exchange	ins[e] <=>				Exchange	1	0	1000	0
EX_leu-L(e)	L-Leucine exchange	leu-L[e] <=>				Exchange	1	0	1000	0
EX_lys-L(e)	L-Lysine exchange	lys-L[e] <=>				Exchange	1	0	1000	0
EX_met-L(e)	L-Methionine exchange	met-L[e] <=>				Exchange	1	0	1000	0
EX_nac(e)	Nicotinate exchange	nac[e] <=>				Exchange	1	0	1000	0
EX_phe-L(e)	L-Phenylalanine exchange	phe-L[e] <=>				Exchange	1	0	1000	0
EX_pro-L(e)	L-Proline exchange	pro-L[e] <=>				Exchange	1	0	1000	0
EX_ribflv(e	riboflavin exchange	ribflv[e] <=>				Exchange	1	0	1000	0
EX_ser-L(e)	L-Serine exchange	ser-L[e] <=>				Exchange	1	0	1000	0
EX_thr-L(e)	L-Threonine exchange	thr-L[e] <=>				Exchange	1	0	1000	0
EX_thym(e)	Thymine exchange	thym[e] <=>				Exchange	1	0	1000	0
EX_thymd(e)	Thymidine exchange	thymd[e] <=>				Exchange	1	0	1000	0
EX_trp-L(e)	L-Tryptophan exchange	trp-L[e] <=>				Exchange	1	0	1000	0
EX_tyr-L(e)	L-Tyrosine exchange	tyr-L[e] <=>				Exchange	1	0	1000	0
EX_uri(e)	Uridine exchange	uri[e] <=>				Exchange	1	0	1000	0
EX_val-L(e)	L-Valine exchange	val-L[e] <=>				Exchange	1	0	1000	0
EX_asn-L(e)	L-Asparagine exchange	asn-L[e] <=>				Exchange	1	0	1000	0
EX_asp-L(e)	L-Aspartate exchange	asp-L[e] <=>				Exchange	1	0	1000	0
EX_chor(e)	Uridine exchange	chor[e] <=>				Exchange	1	0	1000	0
EX_cytd(e)	Cytidine exchange	cytd[e] <=>				Exchange	1	0	1000	0
EX_dad-2(e)	Deoxyadenosine exchange	dad-2[e] <=>				Exchange	1	0	1000	0
EX_dcyt(e)	Deoxycytidine exchange	dcyt[e] <=>				Exchange	1	0	1000	0
EX_pyr(e)	Pyruvate exchange	pyr[e] <=>				Exchange	1	0	1000	0
NH4tpp	ammonia reversible transport (periplasm)	nh4[e] <=> nh4[c]	Amt (Zmob_0888)	Zmob_0888			1	-1000	1000	0			[12]
PIuabcpp	phosphate transport via ABC system (uptake, periplasm)	atp[c] + h2o[c] + pi[e] -> adp[c] + h[c] + 2 pi[c]	PstS (Zmob_0270) and PstC (Zmob_0269) and PstA (Zmob_0268) and PstB (Zmob_0267)	Zmob_0267 and Zmob_0269 and Zmob_0268 and Zmob_0270	phosphate ABC transporter ATPase	ABC transporters	0	0	1000	0			[12]
CU2abcpp	Copper (Cu+2) ABC transporter (periplasm)	atp[c] + cu2[c] + h2o[c] -> adp[c] + h[c] + pi[c] + cu2[e]	CopA (Zmob_0389)	Zmob_0389			0	0	1000	0		3.6.3.54	[12]
GLCNt2rpp	D-gluconate transport via proton symport, reversible (periplasm)	glcn[e] + h[e] <=> glcn[c] + h[c]	GntP (Zmob_1388)	Zmob_1388			1	-1000	1000	0			[12]
GLYCT	glycerol transport via proton symport	glyc[e] + h[e] <=> glyc[c] + h[c]	Gup (Zmob_0980)	Zmob_0980			1	-1000	1000	0			[12]
Kt2pp	potassium transport in via proton symport (periplasm)	h[e] + k[e] -> h[c] + k[c]	Kup (Zmob_0124)	Zmob_0124			0	0	1000	0			[12]
GLYC3Ptex	Glycerol-3-phosphate transport via diffusion (extracellular to periplasm)	glyc3p[e] <=> glyc3p[c]		Zmob_0058 or Zmob_1650			1	-1000	1000	0			[12]
SO4t2pp	sulfate transport in via proton symport (periplasm to cytoplasm)	h[e] + so4[e] -> h[c] + so4[c]	SulP (Zmob_1073)	Zmob_1073			0	0	1000	0			[12]
ETOHtrpp	ethanol reversible transport via diffusion (periplasm)	etoh[e] <=> etoh[c]					1	-1000	1000	0
GLCtex	glucose transport via diffusion (extracellular to periplasm)	glc-D[e] <=> glc-D[c]					1	-1000	1000	0
ACtex	Acetate transport via diffusion (extracellular to periplasm)	ac[e] <=> ac[c]					1	-1000	1000	0
ACALDtex	acetaldehyde transport via diffusion (extracellular to periplasm)	acald[e] <=> acald[c]					1	-1000	1000	0
CO2tex	CO2 transport via diffusion (extracellular to periplasm)	co2[e] <=> co2[c]					1	-1000	1000	0
FORtex	formate transport via diffusion (extracellular to periplasm)	for[e] <=> for[c]					1	-1000	1000	0
FRUtex	D-fructose transport via diffusion (extracellular to periplasm)	fru[e] <=> fru[c]					1	-1000	1000	0
FUMtex	Fumarate transport via diffusion (extracellular to periplasm)	fum[e] <=> fum[c]					1	-1000	1000	0
Htex	proton transport via diffusion (extracellular to periplasm)	h[e] <=> h[c]					1	-1000	1000	0
H2tex	hydrogen transport via diffusion (extracellular to periplasm)	h2[e] <=> h2[c]					1	-1000	1000	0
H2Otex	H2O transport via diffusion (extracellular to periplasm)	h2o[e] <=> h2o[c]					1	-1000	1000	0
D-LACtex	D-lactate transport via diffusion (extracellular to periplasm)	lac-D[e] <=> lac-D[c]					1	-1000	1000	0
MALDtex	D-Malate transport via diffusion (extracellular to periplasm)	mal-L[e] <=> mal-L[c]					1	-1000	1000	0
NAtex	sodium transport via diffusion (extracellular to periplasm)	na1[e] <=> na1[c]					1	-1000	1000	0
O2tex	oxygen transport via diffusion (extracellular to periplasm)	o2[e] <=> o2[c]					1	-1000	1000	0
PNTOtex	Pantothenate transport via diffusion (extracellular to periplasm)	pnto-R[e] <=> pnto-R[c]					1	-1000	1000	0
SBTtex	D-sorbitol transport via diffusion (extracellular to periplasm)	sbt[e] <=> sbt[c]					1	-1000	1000	0
SO4tex	sulfate transport via diffusion (extracellular to periplasm)	so4[e] <=> so4[c]					1	-1000	1000	0
SUCCtex	succinate transport via diffusion (extracellular to periplasm)	succ[e] <=> succ[c]					1	-1000	1000	0
SUCRtex	sucrose transport transport via diffusion (extracellular to periplasm)	sucr[e] <=> sucr[c]					1	-1000	1000	0
MNLtex	D-mannitol transport transport via diffusion	mnl[e] <=> mnl[c]					1	-1000	1000	0
DHAtex	dihydroxyacetone transport via diffusion	dha[e] <=> dha[c]					1	-1000	1000	0
ACTINtex	acetoin transport via diffusion	actin[e] <=> actin[c]					1	-1000	1000	0
MG2t3_2pp	magnesium (Mg+2) transport in/out via proton antiport	2 h[c] + mg2[e] <=> mg2[c] + 2 h[e]	MgtE (Zmob_0518)	Zmob_0518			1	-1000	1000	0			[12]
FE2abcpp	iron (II) transport via ABC system	atp[c] + h2o[c] + fe2[e] -> adp[c] + fe2[c] + h[c] + pi[c]	FeoB (Zmob_1588)	Zmob_1588			1	-1000	1000	0			[12]
5MTRtpp	5-Methylthio-D-ribose transport via proton symport (periplasm)	5mtr[c] + h[c] -> 5mtr[e] + h[e]					0	0	1000	0
NO3tex	nitrate transport via diffusion	no3[e] <=> no3[c]					1	-1000	1000	0
LYSt3pp	L-lysine transport out via proton antiport (cytoplasm to periplasm)	lys-L[c] + h[e] -> h[c] + lys-L[e]	ArgO (Zmob_1218)	Zmob_1218			0	0	1000	0			[12]
ARGt3pp	L-arginine transport out via proton antiport (cytoplasm to periplasm)	arg-L[c] + h[e] -> h[c] + arg-L[e]	ArgO (Zmob_1218)	Zmob_1218			0	0	1000	0			[12]
ASPt2pp	L-aspartate transport in via proton symport (periplasm)	asp-L[e] + h[e] -> asp-L[c] + h[c]	GltP (Zmob_1105)	Zmob_1105			0	0	1000	0			[12]
GLUt2rpp	L-glutamate transport via proton symport, reversible (periplasm)	glu-L[e] + h[e] <=> glu-L[c] + h[c]	GltP (Zmob_1105)	Zmob_1105			1	-1000	1000	0			[12]
HOMt2pp	L-homoserineserine efflux via proton symport	hom-L[c] + h[e] -> h[c] + hom-L[e]	RhtB (Zmob_1651 or Zmob_0015 or Zmob_1672)	Zmob_1651 or Zmob_0015 or Zmob_1672			0	0	1000	0			[12]
ADNt2pp	adenosine transport in via proton symport	adn[e] + h[e] -> adn[c] + h[c]					0	0	1000	0
ALAt2pp	L-alanine transport in via proton symport	ala-L[e] + h[e] -> ala-L[c] + h[c]					0	0	1000	0
ARGabcpp	L-arginine transport via ABC system	atp[c] + h2o[c] + arg-L[e] -> adp[c] + arg-L[c] + h[c] + pi[c]					0	0	1000	0
GLNabcpp	L-glutamine transport via ABC system	atp[c] + h2o[c] + gln-L[e] -> adp[c] + gln-L[c] + h[c] + pi[c]					0	0	1000	0
GLUt2rpp	L-glutamate transport via proton symport, reversible	glu-L[e] + h[e] <=> glu-L[c] + h[c]					1	-1000	1000	0
GLYt2pp	glycine transport in via proton symport	gly[e] + h[e] -> gly[c] + h[c]					0	0	1000	0
GUAt2pp	guanine transport in via proton symport	gua[e] + h[e] -> gua[c] + h[c]					0	0	1000	0
HISt2rpp	L-histidine reversible transport via proton symport	h[e] + his-L[e] <=> h[c] + his-L[c]					1	-1000	1000	0
ILEt2rpp	L-isoleucine reversible transport via proton symport	h[e] + ile-L[e] <=> h[c] + ile-L[c]					1	-1000	1000	0
INSt2pp	inosine transport in via proton symport	h[e] + ins[e] -> h[c] + ins[c]					0	0	1000	0
LEUt2rpp	L-leucine reversible transport via proton symport	h[e] + leu-L[e] <=> h[c] + leu-L[c]					1	-1000	1000	0
LYSt2pp	L-lysine transport in via proton symport	h[e] + lys-L[e] -> h[c] + lys-L[c]					0	0	1000	0
METabcpp	L-methionine transport via ABC system	atp[c] + h2o[c] + met-L[e] -> adp[c] + h[c] + met-L[c] + pi[c]					0	0	1000	0
NACtex	Nicotinic acid transport via diffusion	nac[e] <=> nac[c]					1	-1000	1000	0
PHEt2rpp	L-phenylalanine reversible transport via proton symport	h[e] + phe-L[e] <=> h[c] + phe-L[c]					1	-1000	1000	0
PROt2rpp	L-proline reversible transport via proton symport	h[e] + pro-L[e] <=> h[c] + pro-L[c]					1	-1000	1000	0
RIBFLVt6	riboflavin transport in/out via proton symport	h[e] + ribflv[e] <==> h[c] + ribflv[c]					1	-1000	1000	0
SERt2rpp	L-serine reversible transport via proton symport	h[e] + ser-L[e] <=> h[c] + ser-L[c]					1	-1000	1000	0
THRt2rpp	L-threonine reversible transport via proton symport	h[e] + thr-L[e] <=> h[c] + thr-L[c]					1	-1000	1000	0
THMt6	thymine transport in/out via proton symport	h[e] + thym[e] <==> h[c] + thym[c]					1	-1000	1000	0
THMDt2pp	thymidine transport in via proton symport	h[e] + thymd[e] -> h[c] + thymd[c]					0	0	1000	0
TRPt2rpp	L-tryptophan reversible transport via proton symport	h[e] + trp-L[e] <=> h[c] + trp-L[c]					1	-1000	1000	0
TYRt2rpp	L-tyrosine reversible transport via proton symport (periplasm)	h[e] + tyr-L[e] <=> h[c] + tyr-L[c]					1	-1000	1000	0
URIt2pp	uridine transport in via proton symport	h[e] + uri[e] -> h[c] + uri[c]					0	0	1000	0
VALt2rpp	L-valine reversible transport via proton symport	h[e] + val-L[e] <=> h[c] + val-L[c]					1	-1000	1000	0
ASNt2rpp	L-asparagine reversible transport via proton symport	asn-L[e] + h[e] <=> asn-L[c] + h[c]					1	-1000	1000	0
CHORt2	chorismate transport in/out via proton symport	chor[e] + h[e] <==> chor[c] + h[c]					1	0	1000	0
CYTDt2pp	cytidine transport in via proton symport	cytd[e] + h[e] -> cytd[c] + h[c]					0	0	1000	0
DADNt2pp	deoxyadenosine transport in via proton symport	dad-2[e] + h[e] -> dad-2[c] + h[c]					0	0	1000	0
DCYTt2pp	deoxycytidine transport in via proton symport	dcyt[e] + h[e] -> dcyt[c] + h[c]					0	0	1000	0
PYRt2rpp	pyruvate reversible transport via proton symport	h[e] + pyr[e] <=> h[c] + pyr[c]					1	-1000	1000	0
References
[1]	T. Barthel, R. Jonas, H. Sahm, "NADP+-dependent acetaldehyde dehydrogenase from Zymomonas mobilis", 1989, Archives of Microbiology, 153(1):95-100.
[2]	M. Johns, P. Greenfield, H. Doelle, "Byproducts from Zymomonas mobilis",Bioreactor Systems and Effects, 1991, 97-121
[3]	L. Viikari, M. Korhola, "Fructose metabolism in Zymomonas mobilis", Applied Microbiology and Biotechnology, 1986, 24(6):471-476.
[4]	L. Viikari, "Formation of sorbitol by Zymomonas mobilis", 1984, Applied Microbiology and Biotechnology, 20(4):118-123.
[5]	A. Pentjuss, I. Odzina, A. Kostromins, D.A. Fell, E. Stalidzans, U. Kalnenieks, "Biotechnological potential of respiring Zymomonas mobilis: A stoichiometric analysis of its central metabolism", Journal of Biotechnology, 2013, 165(1):1-10.
[6]	K.Y. Lee, J.M. Park, T.Y. Kim, H. Yun, S.Y. Lee, "The genome-scale metabolic network analysis of Zymomonas mobilis ZM4 explains physiological features and suggests ethanol and succinic acid production strategies", Microbial Cell Factories, 2010, 9: 94.
[7]	J.D. Orth et al., "A comprehensive genome‐scale reconstruction of Escherichia coli metabolism—2011", Molecular Systems Biology, 2011, 7(1):535.
[8]	http://www.lipidmaps.org/
[9]	P.V. Welander et al.,"Identification and characterization of Rhodopseudomonas palustris TIE‐1 hopanoid biosynthesis mutants", Geobiology, 2012, 10(2):163–177.
[10]	S.P. Vincent, P. Sinay, M. Rohmer, "Composite hopanoid biosynthesis in Zymomonas mobilis: N-acetyl-D-glucosamine as precursor for the cyclopentane ring linked to bacteriohopanetetrol", Chemical Communications, 2003, 6:782–783.
[11]	H. Widiastuti, J.Y. Kim, S. Selvarasu, I.A. Karimi, H. Kim, J.S. Seo, D.Y. Lee,"Genome‐scale modeling and in silico analysis of ethanologenic bacteria Zymomonas mobilis", Biotechnology and Bioengineering, 2011, 108(3):655-665.
[12]	http://www.membranetransport.org/

## Sheet: metabolites
Metabolite Abbreviation	Name	Neutral Formula	Charged Formula	Charge	Compartment	KEGG ID	Alternate Names
glc-D[c]	alpha-D-Glucose	C6H12O6	C6H12O6	0	Cytosol	C00031
g6p[c]	alpha-D-Glucose 6-phosphate	C6H13O9P	C6H11O9P	-2	Cytosol	C00092
f6p[c]	beta-D-Fructose 6-phosphate	C6H13O9P	C6H11O9P	-2	Cytosol	C05345
fdp[c]	beta-D-Fructose 1,6-bisphosphate	C6H14O12P2	C6H10O12P2	-4	Cytosol	C05378
dhap[c]	Dihydroxyacetone phosphate	C3H7O6P	C3H5O6P	-2	Cytosol	C00111	Glycerone phosphate
g3p[c]	D-glyceraldehyde 3-phosphate	C3H7O6P	C3H5O6P	-2	Cytosol	C00118	Glyceraldehyde 3-phosphate/ (2R)-2-Hydroxy-3-(phosphonooxy)-propanal
13dpg[c]	3-Phospho-D-glyceroyl phosphate	C3H8O10P2	C3H4O10P2	-4	Cytosol	C00236	1,3-bis-phosphoglycerate/ 3-Phospho-D-glyceroyl phosphate/ 1,3-bisphosphoglycerate/ (R)-2-Hydroxy-3-(phosphonooxy)-1-monoanhydride with phosphoric propanoic acid
3pg[c]	3-Phospho-D-glycerate	C3H7O7P	C3H4O7P	-3	Cytosol	C00197	D-Glycerate 3-phosphate/ 3-Phosphoglycerate/ 3-phosphoglyceric acid
2pg[c]	D-Glycerate 2-phosphate	C3H7O7P	C3H4O7P	-3	Cytosol	C00631	2-Phospho-D-glycerate/ 2-phosphoglyceric acid
pep[c]	Phosphoenolpyruvate	C3H5O6P	C3H2O6P	-3	Cytosol	C00074	Phosphoenolpyruvic acid/ PEP
pyr[c]	Pyruvate	C3H4O3	C3H3O3	-1	Cytosol	C00022	Pyruvic acid/ 2-Oxopropanoate/ 2-Oxopropanoic acid/ Pyroracemic acid/ alpha-Ketopropionic acid/ 2-Ketopropionic Acid
accoa[c]	Acetyl-CoA	C23H38N7O17P3S	C23H34N7O17P3S	-4	Cytosol	C00024	Acetyl coenzyme A
coa[c]	Coenzyme A	C21H36N7O16P3S	C21H32N7O16P3S	-4	Cytosol	C00010	CoA-SH/ CoA/ CoASH
nad[c]	Nicotinamide adenine dinucleotide	C21H28N7O14P2	C21H26N7O14P2	-1	Cytosol	C00003	NAD+/ NAD/ beta-Diphosphopyridine Nucleotide/ beta-NAD/ beta-Nicotinamide adenine dinucleotide
nadh[c]	Nicotinamide adenine dinucleotide - reduced	C21H29N7O14P2	C21H27N7O14P2	-2	Cytosol	C00004	DPNH/ NADH
etoh[c]	Ethanol	C2H6O	C2H6O	0	Cytosol	C00469	Ethyl alcohol/ Methylcarbinol
acald[c]	Acetaldehyde	C2H4O	C2H4O	0	Cytosol	C00084	Aldehyde C(2)/ acetylaldehyde/ Aceteldehyde/ Acetic aldehyde/ Ethyl aldehyde/ Aldehyde/ Ethanal
co2[c]	CO2	CO2	CO2	0	Cytosol	C00011	Carbon dioxide/ Carbonic anhydride
cit[c]	Citrate	C6H8O7	C6H5O7	-3	Cytosol	C00158	Citric acid/ 2-Hydroxytricarballylic acid/ 2/ 2-Hydroxy-1/ 3-propanetricarboxylic acid
oaa[c]	Oxaloacetate	C4H4O5	C4H2O5	-2	Cytosol	C00036	Oxalacetic acid/ Oxaloacetic acid/ 2-oxobutanedioic acid/ Oxosuccinic acid
acon-C[c]	cis-Aconitate	C6H6O6	C6H3O6	-3	Cytosol	C00417	cis-1,2,3-Propenetricarboxylic acid/ (Z)-1-Propene-1,2,3-tricarboxylic acid/ cis-Aconitic acid
icit[c]	Isocitrate	C6H8O7	C6H5O7	-3	Cytosol	C00311	Isocitric acid/ 1-Hydroxytricarballylic acid/ 2/ 3-tricarboxylic acid/ 1-Hydroxypropane-1
nadp[c]	Nicotinamide adenine dinucleotide phosphate	C21H28N7O17P3	C21H25N7O17P3	-3	Cytosol	C00006	beta-Nicotinamide adenine dinucleotide phosphate/ NADP/ NADP+
nadph[c]	Nicotinamide adenine dinucleotide phosphate - reduced	C21H30N7O17P3	C21H26N7O17P3	-4	Cytosol	C00005	TPNH/ beta-triphosphopyridine nucleotide/ NADPH
akg[c]	2-Oxoglutarate	C5H6O5	C5H4O5	-2	Cytosol	C00026	alpha-Ketoglutarate/ Oxoglutaric acid/ 2-Ketoglutaric acid/ alpha-Ketoglutaric Acid
succ[c]	Succinate	C4H6O4	C4H4O4	-2	Cytosol	C00042	Succinic acid/ Butanedionic acid/ Ethylenesuccinic acid
succoa[c]	Succinyl-CoA	C25H40N7O19P3S	C25H35N7O19P3S	-5	Cytosol	C00091	succino-1-yl-coenzymeA/ Succinyl coenzyme A
q10[c]	Ubiquinone-10	C59H90O4	C59H90O4	0	Cytosol	C00399
q10h2[c]	Ubiquinol-10	C59H92O4	C59H92O4	0	Cytosol	C00390
fum[c]	Fumarate	C4H4O4	C4H2O4	-2	Cytosol	C00122	boletic acid/ allomaleic acid/ Fumaric acid/ Trans-butenedioic acid
mal-L[c]	L-Malate	C4H6O5	C4H4O5	-2	Cytosol	C00149	(S)-Malate/ L-Apple acid/ L-Malic acid/ L-2-Hydroxybutanedioic acid/ Malate
ac[c]	Acetate	C2H4O2	C2H3O2	-1	Cytosol	C00033	vinegar/ Ethylic acid/ Vinegar acid/ Methanecarboxylic acid/ Acetic acid/ Ethanoic acid
6pgl[c]	6-phospho-D-glucono-1,5-lactone	C6H11O9P	C6H9O9P	-2	Cytosol	C01236	D-Glucono-1,5-lactone 6-phosphate
6pgc[c]	6-Phospho-D-gluconate	C6H13O10P	C6H10O10P	-3	Cytosol	C00345	6-phosphogluconic acid/ D-gluconate 6-phosphate
2ddg6p[c]	2-Dehydro-3-deoxy-D-gluconate 6-phosphate	C6H11O9P	C6H8O9P	-3	Cytosol	C04442	2-Dehydro-3-deoxy-6-phospho-D-gluconate/ 6-Phospho-2-dehydro-3-deoxy-D-gluconate/ 2-Keto-3-deoxy-6-phosphogluconate
glcn[c]	D-Gluconate	C6H12O7	C6H11O7	-1	Cytosol	C00257	D-Gluconic acid/ D-Gluco-hexonic acid/ Dextronic Acid
ru5p-D[c]	D-Ribulose 5-phosphate	C5H11O8P	C5H9O8P	-2	Cytosol	C00199
xu5p-D[c]	D-Xylulose 5-phosphate	C5H11O8P	C5H9O8P	-2	Cytosol	C00231
r5p[c]	alpha-D-Ribose 5-phosphate	C5H11O8P	C5H9O8P	-2	Cytosol	C00117	D-Ribose 5-phosphate/ D-Ribose-5-phosphate/ Ribose 5-phosphate
prpp[c]	5-Phospho-alpha-D-ribose 1-diphosphate	C5H13O14P3	C5H8O14P3	-5	Cytosol	C00119	5-Phosphoribosyl 1-pyrophosphate/ 5-Phosphoribosyl diphosphate/ PRPP
s7p[c]	Sedoheptulose 7-phosphate	C7H15O10P	C7H13O10P	-2	Cytosol	C05382	altro-Heptulose 7-phosphate
e4p[c]	D-Erythrose 4-phosphate	C4H9O7P	C4H7O7P	-2	Cytosol	C00279	4-phospho D-erythrose
udpg[c]	UDPglucose	C15H24N2O17P2	C15H22N2O17P2	-2	Cytosol	C00029	UDP-D-glucose
g1p[c]	D-Glucose 1-phosphate	C6H13O9P	C6H11O9P	-2	Cytosol	C00103	Cori ester/ alpha-D-Glucose 1-phosphate/ Glucose 1-phosphate
utp[c]	UTP	C9H15N2O15P3	C9H11N2O15P3	-4	Cytosol	C00075	Uridine 5'-triphosphate/ Uridine triphosphate/ rUTP/ 5'-uridylate triphosphate
ppi[c]	Diphosphate	H4O7P2	HO7P2	-3	Cytosol	C00013	Pyrophosphate/ Pyrophosphoric acid/ PPi
udpglcur[c]	UDP-D-glucuronate	C15H22N2O18P2	C15H19N2O18P2	-3	Cytosol	C00167	UDPglucuronate/ UDP-GlcA
fru[c]	D-Fructose	C6H12O6	C6H12O6	0	Cytosol	C00095	Levulose/ Fruit sugar/ D-Arabino-hexulose
mnl[c]	D-Mannitol	C6H14O6	C6H14O6	0	Cytosol	C00392
f1p[c]	D-Fructose 1-phosphate	C6H13O9P	C6H11O9P	-2	Cytosol	C01094
glyald[c]	D-Glyceraldehyde	C3H6O3	C3H6O3	0	Cytosol	C00577	(R)-glyceraldehyde
all6p[c]	D-Allose 6-phosphate	C6H13O9P	C6H11O9P	-2	Cytosol	C02962	D-Allose 6-phosphate
allul6p[c]	Allulose 6-phosphate	C6H13O9P	C6H11O9P	-2	Cytosol	C18096
man1p[c]	D-Mannose 1-phosphate	C6H13O9P	C6H11O9P	-2	Cytosol	C00636	alpha-D-Mannose 1-phosphate
man6p[c]	D-Mannose 6-phosphate	C6H13O9P	C6H11O9P	-2	Cytosol	C00275
gdp[c]	GDP	C10H15N5O11P2	C10H12N5O11P2	-3	Cytosol	C00035	Guanosine 5'-diphosphate/ Guanosine diphosphate
gdpmann[c]	GDP-D-mannose	C16H25N5O16P2	C16H23N5O16P2	-2	Cytosol	C00096
udpgal[c]	UDPgalactose	C15H24N2O17P2	C15H22N2O17P2	-2	Cytosol	C00052	UDP-D-galactopyranose/ UDP-D-galactose
melib[c]	Melibiose	C12H22O11	C12H22O11	0	Cytosol	C05402	6-O-(alpha-D-Galactopyranosyl)-D-glucopyranose
raffin[c]	Raffinose	C18H32O16	C18H32O16	0	Cytosol	C00492	Melitose; Melitriose; Gossypose; 6G-alpha-D-galactosylsucrose
stachy[c]	Stachyose	C24H42O21	C24H42O21	0	Cytosol	C01613
manit[c]	Manninotriose	C18H32O16	C18H32O16	0	Cytosol	C05404	D-Gal alpha 1->6D-Gal alpha 1->6D-Glucose; D-Gal-alpha1->6D-Gal-alpha1->6D-Glucose
udpgalc[c]	UDP-D-galacturonate	C15H22N2O18P2	C15H20N2O18P2	-2	Cytosol	C00617	UDPgalacturonate
sucr6p[c]	Sucrose 6-phosphate	C12H23O14P	C12H21O14P	-2	Cytosol	C16688	6-Phosphosucrose; 6-O-Phosphonosucrose; beta-D-Fructofuranosyl-6-O-phosphono-alpha-D-glucopyranoside
sucr[c]	Sucrose	C12H22O11	C12H22O11	0	Cytosol	C00089	Cane sugar/ Saccharose/ Sugar/ 1-alpha-D-glucopyranosyl-2-beta-D-fructofuranoside
cel1[c]	Cellulose	C6H10O5	C6H10O5	0	Cytosol	C00760	(1,4-beta-D-Glucosyl)n; 1,4-beta-D-Glucan; Microcrystalline cellulose
cel2[c]	Cellulose	C12H20O10	C12H20O10	0	Cytosol	C00760	(1,4-beta-D-Glucosyl)n+1;
acmum6p[c]	N-acetylmuramate 6-phosphate	C11H20NO11P	C11H17NO11P	-3	Cytosol	C16698	N-Acetylmuramate-6-phosphate/ MurNAc-6-p
acgam6p[c]	N-Acetyl-D-glucosamine 6-phosphate	C8H16NO9P	C8H14NO9P	-2	Cytosol	C00357
lac-D[c]	D-Lactate	C3H6O3	C3H5O3	-1	Cytosol	C00256	(R)-Lactate/ D-Lactic acid/ D-2-Hydroxypropanoic acid/ D-2-Hydroxypropionic acid
gam1p[c]	D-Glucosamine 1-phosphate	C6H14NO8P	C6H13NO8P	-1	Cytosol	C06156
gam6p[c]	D-Glucosamine 6-phosphate	C6H14NO8P	C6H13NO8P	-1	Cytosol	C00352	D-Glucosamine phosphate
acgam1p[c]	N-Acetyl-D-glucosamine 1-phosphate	C8H16NO9P	C8H14NO9P	-2	Cytosol	C04256
uacgam[c]	UDP-N-acetyl-D-glucosamine	C17H27N3O17P2	C17H25N3O17P2	-2	Cytosol	C00043	UDP-N-acetylglucosamine/ common abbr: UDP-NAcGlc/ UDP-GlcNAc
gln-L[c]	L-Glutamine	C5H10N2O3	C5H10N2O3	0	Cytosol	C00064	Gln/ L-2-Aminoglutaramic acid
glu-L[c]	L-Glutamate	C5H9NO4	C5H8NO4	-1	Cytosol	C00025	L-Glutamic acid/ L-Glutaminic acid/ Glu
chtbs[c]	Chitobiose	C16H28N2O11	C16H28N2O11	0	Cytosol	C001674	N,N'-diacetylchitobiose, Diacetylchitobiose
acgam[c]	N-Acetyl-D-glucosamine	C8H15NO6	C8H15NO6	0	Cytosol	C00140	N-Acetylchitosamine; 2-Acetamido-2-deoxy-D-glucose; GlcNAc
uaccg[c]	UDP-N-acetyl-3-O-(1-carboxyvinyl)-D-glucosamine	C20H29N3O19P2	C20H26N3O19P2	-3	Cytosol	C04631	UDP-N-acetyl-3-(1-carboxyvinyl)-D-glucosamine/ UDP-N-acetylglucosamine-3-O-pyruvateether/ common abbr: UDP-NAcGlc-enolpyruvate
uamr[c]	UDP-N-acetylmuramate	C20H31N3O19P2	C20H28N3O19P2	-3	Cytosol	C01050	UDP-MurNac/ common abbr: UDP-NAcMur
for[c]	Formate	CH2O2	CH1O2	-1	Cytosol	C00058	Hydrogencarboxylic acid/ aminic acid/ Methanoic acid/ Formic acid
lgt-S[c]	(R)-S-Lactoylglutathione	C13H21N3O8S	C13H20N3O8S	-1	Cytosol	C03451
gthrd[c]	Reduced glutathione	C10H17N3O6S	C10H16N3O6S	-1	Cytosol	C00051	Glutathione/ 5-L-Glutamyl-L-cysteinylglycine/ N-(N-gamma-L-Glutamyl-L-cysteinyl)glycine/ gamma-L-Glutamyl-L-cysteinyl-glycine
mthgxl[c]	Methylglyoxal	C3H4O2	C3H4O2	0	Cytosol	C00546	Pyruvaldehyde/ Pyruvic aldehyde/ 2-Ketopropionaldehyde/ 2-Oxopropanal
lald-D[c]	D-Lactaldehyde	C3H6O2	C3H6O2	0	Cytosol	C00937	(R)-Lactaldehyde/ D-2-Hydroxypropionaldehyde
hcit[c]	Homocitrate	C7H10O7	C7H7O7	-3	Cytosol	CO1251	(R)-2-Hydroxybutane-1,2,4-tricarboxylate; Homocitric acid; 3-Hydroxy-3-carboxyadipic acid; (R)-2-Hydroxy-1,2,4-butanetricarboxylic acid
2pglyc[c]	2-Phosphoglycolate	C2H5O6P	C2H2O6P	-3	Cytosol	C00988	Phosphoglycolic acid/ 2-phosphoglycolic acid
glyclt[c]	Glycolate	C2H4O3	C2H3O3	-1	Cytosol	C00160	Glycolic acid/ Hydroxyacetic acid
hpyr[c]	Hydroxypyruvate	C3H4O4	C3H3O4	-1	Cytosol	C00168	Hydroxypyruvic acid/ 3-Hydroxypyruvate/ 3-Hydroxypyruvic acid
glyc-R[c]	(R)-Glycerate	C3H6O4	C3H5O4	-1	Cytosol	C00258	D-Glycerate/ Glycerate/ Glyceric acid
glx[c]	Glyoxylate	C2H2O3	C2H1O3	-1	Cytosol	C00048	Acetic acid/ Glyoxalate/ Glyoxylic acid
4h2og[c]	4-Hydroxy-2-oxoglutarate	C5H6O6	C5H4O6	-2	Cytosol	C01127	4-Hydroxy-2-oxoglutaric acid
h2o2[c]	Hydrogen peroxide	H2O2	H2O2	0	Cytosol	C00027	peroxide/ hydrogen dioxide/ H2O2
h2o[c]	H2O	H2O	H2O	0	Cytosol	C00001	Water/ Dihydrogen oxide
o2[c]	O2	O2	O2	0	Cytosol	C00007	Oxygen/ dioxygen
2obut[c]	2-Oxobutanoate	C4H6O3	C4H5O3	-1	Cytosol	C00109	2-Ketobutyric acid/ 2-Oxobutyric acid/ 2-Oxobutyrate/ 2-Oxobutanoic acid/ alpha-Ketobutyrate
ppcoa[c]	Propanoyl-CoA	C24H40N7O17P3S	C24H36N7O17P3S	-4	Cytosol	C00100	Propionyl-CoA/ Propionyl coenzyme A
alac-S[c]	(S)-2-Acetolactate	C5H8O4	C5H7O4	-1	Cytosol	C06010	(S)-2-Hydroxy-2-methyl-3-oxobutanoate
dactyl[c]	Diacetyl	C4H6O2	C4H6O2	0	Cytosol	C00741	Biacetyl/Dimethylglyoxal/2,3-Butanedione
actin[c]	(S)-Acetoin	C4H8O2	C4H8O2	0	Cytosol	C01769	(S)-2-Acetoin
butdol[c]	S,S)-2,3-Butanediol	C4H10O2	C4H10O2	0	Cytosol	C03046	(S,S)-Butane-2,3-diol/(S,S)-2,3-Butylene glycol/(2S,3S)-Butane-2,3-diol
sucsal[c]	Succinic semialdehyde	C4H6O3	C4H5O3	-1	Cytosol	C00232	4-Oxobutanoate/ Succinate semialdehyde
mi1p-D[c]	1D-myo-Inositol 1-phosphate	C6H13O9P	C6H11O9P	-2	Cytosol	C01177	Inositol 1-phosphate/ D-myo-Inositol 1-phosphate/ L-myo-Inositol 1-phosphate/ myo-Inositol 1-phosphate/ 1D-myo-Inositol 1-monophosphate/ 1L-myo-Inositol 1-phosphate
inost[c]	myo-Inositol	C6H12O6	C6H12O6	0	Cytosol	C00137	D-myo-Inositol/ 1D-myo-Inositol/ L-myo-Inositol/ 1L-myo-Inositol/ meso-Inositol/ Inositol/ Dambose/ Cyclohexitol/ Meat sugar/ Bios I
minohp[c]	myo-Inositol hexakisphosphate	C6H18O24P6	C6H6O24P6	-12	Cytosol	C01204	Inositol 1,2,3,4,5,6-hexakisphosphate/ D-myo-Inositol 1,2,3,4,5,6-hexakisphosphate/ Phytic acid/ Phytate/ myo-Inositol 1,2,3,4,5,6-hexakisphosphate/ 1D-myo-Inositol 1,2,3,4,5,6-hexakisphosphate
froc[c]	Ferrocytochrome c	C42H44FeN8O8S2R4	C42H44FeN8O8S2R4	2	Cytosol	C00126	Cytochrome c2+; Reduced cytochrome c
fric[c]	Ferricytochrome c	C42H44FeN8O8S2R4	C42H44FeN8O8S2R4	3	Cytosol	C00125	Cytochrome c3+
pi[c]	Phosphate	H3O4P	HO4P	-2	Cytosol	C00009	Orthophosphate/ Pi/ Phosphoric acid
pppi[c]	Inorganic triphosphate	H5O10P3	HO10P3	-4	Cytosol	C00536
atp[c]	ATP	C10H16N5O13P3	C10H12N5O13P3	-4	Cytosol	C00002	Adenosine 5'-triphosphate/ 5'-adenylate triphosphate
adp[c]	ADP	C10H15N5O10P2	C10H12N5O10P2	-3	Cytosol	C00008	Adenosine 5'-diphosphate
hmgth[c]	hydroxymethylglutathione	C11H19N3O7S	C11H18N3O7S	-1	Cytosol	C14180	HMGSH/ GS-CH2-OH/ S-(hydroxymethyl)glutathione/ HM-GSH
Sfglutth[c]	S-Formylglutathione	C11H17N3O7S	C11H16N3O7S	-1	Cytosol	C01031
hco3[c]	Bicarbonate	CH2O3	CHO3	-1	Cytosol	C00288	Acid carbonate/ HCO3-/ Hydrogencarbonate
n2[c]	Nitrogen	N2	N2	0	Cytosol	C00697
frdrd[c]	Reduced ferredoxin				Cytosol	C00138
frdox[c]	Oxidized ferredoxin				Cytosol	C00139
nh4[c]	Ammonium	NH3	NH4	1	Cytosol	C00014	NH3
aps[c]	Adenosine 5'-phosphosulfate	C10H14N5O10PS	C10H12N5O10PS	-2	Cytosol	C00224	APS/ Adenylylsulfate
so4[c]	Sulfate	H2SO4	SO4	-2	Cytosol	C00059	Sulfuric acid
paps[c]	3'-Phosphoadenylyl sulfate	C10H15N5O13P2S	C10H11N5O13P2S	-4	Cytosol	C00053	3'-Phosphoadenosine 5'-phosphosulfate/ 3'-Phospho-5-adenylyl sulfate/ PAPS
trdrd[c]	Reduced thioredoxin	XH2	XH2	0	Cytosol	C00342
trdox[c]	Oxidized thioredoxin	X	X	0	Cytosol	C00343
pap[c]	Adenosine 3',5'-bisphosphate	C10H15N5O10P2	C10H11N5O10P2	-4	Cytosol	C00054	PAP/ 3'-Phosphoadenylate/ Phosphoadenosine phosphate
so3[c]	Sulfite	H2SO3	SO3	-2	Cytosol	C00094	Sulfurous acid
h2s[c]	Hydrogen sulfide	H2S	H2S	0	Cytosol	C00283	H2S/ Hydrogen-sulfide/ sulfide
amp[c]	AMP	C10H14N5O7P	C10H12N5O7P	-2	Cytosol	C00020	Adenosine 5'-monophosphate/ Adenylic acid/ Adenylate/ 5'-AMP/ 5'-Adenylic acid/ 5'-Adenosine monophosphate/ Adenosine 5'-phosphate
ACP[c]	acyl carrier protein	C11H22N2O7PRS	C11H21N2O7PRS	-1	Cytosol	C00229
acACP[c]	Acetyl-ACP	C13H24N2O8PRS	C13H23N2O8PRS	-1	Cytosol	C03939
malcoa[c]	Malonyl-CoA	C24H38N7O19P3S	C24H33N7O19P3S	-5	Cytosol	C00083	Malonyl coenzyme A
malACP[c]	Malonyl-[acyl-carrier protein]	C3H3O3R	C3H1O3R	-2	Cytosol	C01209
actACP[c]	Acetoacetyl-ACP	C4H5O2RS	C4H4O2RS	-1	Cytosol	C05744
3hbutACP[c]	(3R)-3-Hydroxybutanoyl-[acyl-carrier protein]	C4H7O2SR	C4H6O2SR	-1	Cytosol	C04618
but2eACP[c]	But-2-enoyl-[acyl-carrier protein]	C4H5OSR	C4H4OSR	-1	Cytosol	C04246
butACP[c]	Butyryl-ACP (n-C4:0ACP)	C4H7OSR	C4H6OSR	-1	Cytosol	C05745	Butyryl-[acp]/ Butyryl-[acyl-carrier protein]
3ohexACP[c]	3-Oxohexanoyl-[acyl-carrier protein]	C17H30N2O9PRS	C17H29N2O9PRS	-1	Cytosol	C05746
idp[c]	IDP	C10H14N4O11P2	C10H11N4O11P2	-3	Cytosol	C00104	5'-inosinate diphosphate/ Inosine 5'-diphosphate/ Inosine diphosphate
thex2eACP[c]	trans-Hex-2-enoyl-[acyl-carrier protein]	C17H30N2O8PRS	C17H29N2O8PRS	-1	Cytosol	C05748
3hhexACP[c]	(R)-3-Hydroxyhexanoyl-[acyl-carrier protein]	C17H32N2O9PRS	C17H31N2O9PRS	-1	Cytosol	C05747
3ooctACP[c]	3-Oxooctanoyl-[acyl-carrier protein]	C19H34N2O9PRS	C19H33N2O9PRS	-1	Cytosol	C05750	3-Oxohexanoyl-[acp]
3hoctACP[c]	(R)-3-Hydroxyoctanoyl-[acyl-carrier protein]	C19H36N2O9PRS	C19H35N2O9PRS	-1	Cytosol	C04620	(R)-3-Hydroxyhexanoyl-[acp]/ D-3-Hydroxyhexanoyl-[acp]/ D-3-Hydroxyhexanoyl-[acyl-carrier protein]
toct2eACP[c]	trans-Oct-2-enoyl-[acyl-carrier protein]	C19H34N2O8PRS	C19H33N2O8PRS	-1	Cytosol	C05751	trans-Hex-2-enoyl-[acp]
ocACP[c]	Octanoyl-ACP (n-C8:0ACP)	C19H36N2O8PRS	C19H35N2O8PRS	-1	Cytosol	C05752	(R)-3-Hydroxyhexanoyl-[acp]/ D-3-Hydroxyhexanoyl-[acp]/ D-3-Hydroxyhexanoyl-[acyl-carrier protein]
3odecACP[c]	3-Oxodecanoyl-[acyl-carrier protein]	C21H38N2O9PRS	C21H37N2O9PRS	-1	Cytosol	C05753	3-Oxooctanoyl-[acp]
3hdecACP[c]	(R)-3-Hydroxydecanoyl-[acyl-carrier protein]	C21H40N2O9PRS	C21H39N2O9PRS	-1	Cytosol	C04619	(3R)-3-Hydroxyoctanoyl-[acyl-carrier protein]
tdec2eACP[c]	trans-Dec-2-enoyl-[acyl-carrier protein]	C21H38N2O8PRS	C21H37N2O8PRS	-1	Cytosol	C05754	trans-Oct-2-enoyl-[acp]
dcaACP[c]	Decanoyl-ACP (n-C10:0ACP)	C21H40N2O8PRS	C21H39N2O8PRS	-1	Cytosol	C05755	Octanoyl-[acyl-carrier protein]/ Octanoyl-[acp]
3oddecACP[c]	3-Oxododecanoyl-[acyl-carrier protein]	C23H42N2O9PRS	C23H41N2O9PRS	-1	Cytosol	C05756	3-Oxodecanoyl-[acp]
3hddecACP[c]	(R)-3-Hydroxydodecanoyl-[acyl-carrier protein]	C23H44N2O9PRS	C23H43N2O9PRS	-1	Cytosol	C05757	(3R)-3-Hydroxydecanoyl-[acyl-carrier protein]
tddec2eACP[c]	trans-Dodec-2-enoyl-[acyl-carrier protein]	C23H42N2O8PRS	C23H41N2O8PRS	-1	Cytosol	C05758	trans-Dec-2-enoyl-[acp]
ddcaACP[c]	Dodecanoyl-ACP (n-C12:0ACP)	C23H44N2O8PRS	C23H43N2O8PRS	-1	Cytosol	C05223	Decanoyl-[acyl-carrier protein]/ Decanoyl-[acp]
3omrsACP[c]	3-Oxotetradecanoyl-[acyl-carrier protein]	C25H46N2O9PRS	C25H45N2O9PRS	-1	Cytosol	C05759	3-Oxododecanoyl-[acp]
3hmrsACP[c]	(R)-3-Hydroxytetradecanoyl-[acyl-carrier protein]	C25H48N2O9PRS	C25H47N2O9PRS	-1	Cytosol	C04688	(R)-3-Hydroxydodecanoyl-[acp]/ D-3-Hydroxydodecanoyl-[acp]/ D-3-Hydroxydodecanoyl-[acyl-carrier protein]
tmrs2eACP[c]	trans-Tetradec-2-enoyl-[acyl-carrier protein]	C25H46N2O8PRS	C25H45N2O8PRS	-1	Cytosol	C05760	trans-Dodec-2-enoyl-[acp]
myrsACP[c]	Myristoyl-ACP (n-C14:0ACP)	C25H48N2O8PRS	C25H47N2O8PRS	-1	Cytosol	C05761	Dodecanoyl-[acyl-carrier protein]/ Dodecanoyl-[acp]/ Fatty Acid C12 ACP/ Lauroyl ACP
3opalmACP[c]	3-Oxohexadecanoyl-[acyl-carrier protein]	C27H50N2O9PRS	C27H49N2O9PRS	-1	Cytosol	C05762	3-Oxotetradecanoyl-[acp]
tpalm2eACP[c]	trans-Hexadec-2-enoyl-[acyl-carrier protein]	C27H50N2O8PRS	C27H49N2O8PRS	-1	Cytosol	C05763	trans-Hexadec-2-enoyl-[acp]
3hpalmACP[c]	R-3-hydroxypalmitoyl-[acyl-carrier protein]	C27H52N2O9PRS	C27H51N2O9PRS	-1	Cytosol	C04633	(R)-3-Hydroxypalmitoyl-[acyl-carrier protein]/ (3R)-3-Hydroxyhexadecanoyl-[acyl-carrier protein]/ (R)-3-Hydroxyhexadecanoyl-[acyl-carrier protein]/ (3R)-3-Hydroxypalmitoyl-[acyl-carrier protein]
3ooctdACP[c]	3-Oxooctadecanoyl-[acyl-carrier protein]	C29H54N2O9PRS	C29H53N2O9PRS	-1	Cytosol	C16219	3-Oxooctadecanoyl-[acp]
3hoctaACP[c]	(R)-3-Hydroxyoctadecanoyl-[acyl-carrier protein]	C29H56N2O9PRS	C29H55N2O9PRS	-1	Cytosol	C16220
toctd2eACP[c]	trans-octadec-2-enoyl-[acyl-carrier protein]	C29H54N2O8PRS	C29H53N2O8PRS	-1	Cytosol	C16221	trans-octadec-2-enoyl-[acp]
ocdcaACP[c]	Octadecanoyl-ACP (n-C18:0ACP)	C29H56N2O8PRS	C29H55N2O8PRS	-1	Cytosol	C04088	stearoyl-ACP
glyc3p[c]	Glycerol 3-phosphate	C3H9O6P	C3H7O6P	-2	Cytosol	C00093	Glycerophosphoric acid/ sn-Gro-1-P/ Phosphatidyl glycerol/ sn-Glycerol 3-phosphate
1ddecg3p[c]	1-dodecanoyl-sn-glycerol 3-phosphate	C15H31O7P1	C15H29O7P1	-2	Cytosol	C00681	1-Acyl-sn-glycerol 3-phosphate (n-C12:0)
1tdecg3p[c]	1-tetradecanoyl-sn-glycerol 3-phosphate	C17H35O7P1	C17H33O7P1	-2	Cytosol	C00681	1-Acyl-sn-glycerol 3-phosphate (n-C14:0)
1tdec7eg3p[c]	1-tetradec-7-enoyl-sn-glycerol 3-phosphate	C17H33O7P1	C17H31O7P1	-2	Cytosol	C00681	1-Acyl-sn-glycerol 3-phosphate (n-C16)
1hdecg3p[c]	1-hexadecanoyl-sn-glycerol 3-phosphate	C19H39O7P1	C19H37O7P1	-2	Cytosol	C00681	1-Acyl-sn-glycerol 3-phosphate (n-C14:1)
1hdec9eg3p[c]	1-hexadec-9-enoyl-sn-glycerol 3-phosphate	C19H37O7P1	C19H35O7P1	-2	Cytosol	C00681	1-Acyl-sn-glycerol 3-phosphate (n-C16:1)
1odecg3p[c]	1-octadecanoyl-sn-glycerol 3-phosphate	C21H43O7P1	C21H41O7P1	-2	Cytosol	C00681	1-Acyl-sn-glycerol 3-phosphate (n-C18)
1odec11eg3p[c]	1-octadec-11-enoyl-sn-glycerol 3-phosphate	C21H41O7P1	C21H39O7P1	-2	Cytosol	C00681	1-Acyl-sn-glycerol 3-phosphate (n-C18:1)
pa120[c]	1,2-didodecanoyl-sn-glycerol 3-phosphate	C27H53O8P1	C27H51O8P1	-2	Cytosol	C00416	Phosphatidate/ Phosphatidic acid/ 1,2-Diacyl-sn-glycerol 3-phosphate/ 3-sn-Phosphatidate
pa140[c]	1,2-ditetradecanoyl-sn-glycerol 3-phosphate	C31H61O8P1	C31H59O8P1	-2	Cytosol	C00416	Phosphatidic acid/ Phosphatidate/ 3-sn-Phosphatidate/ 1,2-Diacyl-sn-glycerol 3-phosphate
pa141[c]	1,2-ditetradec-7-enoyl-sn-glycerol 3-phosphate	C31H57O8P1	C31H55O8P1	-2	Cytosol	C00416	Phosphatidate/ Phosphatidic acid/ 1,2-Diacyl-sn-glycerol 3-phosphate/ 3-sn-Phosphatidate
pa160[c]	1,2-dihexadecanoyl-sn-glycerol 3-phosphate	C35H69O8P1	C35H67O8P1	-2	Cytosol	C00416	1,2-Diacyl-sn-glycerol 3-phosphate/ Phosphatidate/ Phosphatidic acid/ 3-sn-Phosphatidate
pa161[c]	1,2-dihexadec-9-enoyl-sn-glycerol 3-phosphate	C35H67O8P1	C35H63O8P1	-2	Cytosol	C00416	Phosphatidate/ 1,2-Diacyl-sn-glycerol 3-phosphate/ 3-sn-Phosphatidate/ Phosphatidic acid
pa180[c]	1,2-dioctadecanoyl-sn-glycerol 3-phosphate	C39H77O8P1	C39H75O8P1	-2	Cytosol	C00416	Phosphatidate/ 1,2-Diacyl-sn-glycerol 3-phosphate/ 3-sn-Phosphatidate/ Phosphatidic acid
pa181[c]	1,2-dioctadec-11-enoyl-sn-glycerol 3-phosphate	C39H73O8P1	C39H71O8P1	-2	Cytosol	C00416	1,2-Diacyl-sn-glycerol 3-phosphate/ Phosphatidate/ Phosphatidic acid/ 3-sn-Phosphatidate
cdpdddecg[c]	CDP-1,2-didodecanoylglycerol	C36H65N3O15P2	C36H63N3O15P2	-2	Cytosol	C00269	CDP-1,2-diacylglycerol/ CDPdiacylglycerol/ 1,2-Diacyl-sn-glycero-3-cytidine-5'-diphosphate
cdpdhdec9eg[c]	CDP-1,2-dihexadec-9-enoylglycerol	C44H77N3O15P2	C44H75N3O15P2	-2	Cytosol	C00269	1,2-Diacyl-sn-glycero-3-cytidine-5'-diphosphate/ CDP-1,2-diacylglycerol/ CDPdiacylglycerol
cdpdhdecg[c]	CDP-1,2-dihexadecanoylglycerol	C44H81N3O15P2	C44H79N3O15P2	-2	Cytosol	C00269	CDP-1,2-diacylglycerol/ CDPdiacylglycerol/ 1,2-Diacyl-sn-glycero-3-cytidine-5'-diphosphate
cdpdodec11eg[c]	CDP-1,2-dioctadec-11-enoylglycerol	C48H85N3O15P2	C48H83N3O15P2	-2	Cytosol	C00269	CDPdiacylglycerol/ 1,2-Diacyl-sn-glycero-3-cytidine-5'-diphosphate/ CDP-1,2-diacylglycerol
cdpdodecg[c]	CDP-1,2-dioctadecanoylglycerol	C48H89N3O15P2	C48H87N3O15P2	-2	Cytosol	C00269	1,2-Diacyl-sn-glycero-3-cytidine-5'-diphosphate/ CDPdiacylglycerol/ CDP-1,2-diacylglycerol
cdpdtdec7eg[c]	CDP-1,2-ditetradec-7-enoylglycerol	C40H69N3O15P2	C40H67N3O15P2	-2	Cytosol	C00269	CDPdiacylglycerol/ CDP-1,2-diacylglycerol/ 1,2-Diacyl-sn-glycero-3-cytidine-5'-diphosphate
cdpdtdecg[c]	CDP-1,2-ditetradecanoylglycerol	C40H73N3O15P2	C40H71N3O15P2	-2	Cytosol	C00269	CDP-1,2-diacylglycerol/ 1,2-Diacyl-sn-glycero-3-cytidine-5'-diphosphate/ CDPdiacylglycerol
ser-L[c]	L-Serine	C3H7NO3	C3H7NO3	0	Cytosol	C00065	L-2-Amino-3-hydroxypropionic acid/ L-3-Hydroxy-alanine/ Ser
cmp[c]	CMP	C9H14N3O8P	C9H12N3O8P	-2	Cytosol	C00055	Cytidine-5'-monophosphate/ Cytidylic acid/ 3'-Cytidylic Acid/ Cytidine-2'(3')-monophosphoric acid/ Cytidine-2[(3[)-monophosphoric acid
ps120[c]	phosphatidylserine (didodecanoyl, n-C12:0)	C30H58N1O10P1	C30H57N1O10P1	-1	Cytosol	C02737	Phosphatidyl-L-serine/ 3-O-sn-Phosphatidyl-L-serine/ 1,2-Diacyl-sn-glycerol 3-phospho-L-serine/ O3-Phosphatidyl-L-serine
ps140[c]	phosphatidylserine (ditetradecanoyl, n-C14:0)	C34H66N1O10P1	C34H65N1O10P1	-1	Cytosol	C02737	Phosphatidyl-L-serine/ O3-Phosphatidyl-L-serine/ 1,2-Diacyl-sn-glycerol 3-phospho-L-serine/ 3-O-sn-Phosphatidyl-L-serine
ps141[c]	phosphatidylserine (ditetradec-7-enoyl, n-C14:1)	C34H62N1O10P1	C34H61N1O10P1	-1	Cytosol	C02737	Phosphatidyl-L-serine/ 1,2-Diacyl-sn-glycerol 3-phospho-L-serine/ O3-Phosphatidyl-L-serine/ 3-O-sn-Phosphatidyl-L-serine
ps160[c]	phosphatidylserine (dihexadecanoyl, n-C16:0)	C38H74N1O10P1	C38H73N1O10P1	-1	Cytosol	C02737	1,2-Diacyl-sn-glycerol 3-phospho-L-serine/ O3-Phosphatidyl-L-serine/ Phosphatidyl-L-serine/ 3-O-sn-Phosphatidyl-L-serine
ps161[c]	phosphatidylserine (dihexadec-9-enoyl, n-C16:1)	C38H70N1O10P1	C38H69N1O10P1	-1	Cytosol	C02737	Phosphatidyl-L-serine/ 3-O-sn-Phosphatidyl-L-serine/ 1,2-Diacyl-sn-glycerol 3-phospho-L-serine/ O3-Phosphatidyl-L-serine
ps180[c]	phosphatidylserine (dioctadecanoyl, n-C18:0)	C42H82N1O10P1	C42H81N1O10P1	-1	Cytosol	C02737	Phosphatidyl-L-serine/ 1,2-Diacyl-sn-glycerol 3-phospho-L-serine/ O3-Phosphatidyl-L-serine/ 3-O-sn-Phosphatidyl-L-serine
ps181[c]	phosphatidylserine (dioctadec-11-enoyl, n-C18:1)	C42H78N1O10P1	C42H77N1O10P1	-1	Cytosol	C02737	1,2-Diacyl-sn-glycerol 3-phospho-L-serine/ Phosphatidyl-L-serine/ O3-Phosphatidyl-L-serine/ 3-O-sn-Phosphatidyl-L-serine
pg120[c]	Phosphatidylglycerol (didodecanoyl, n-C12:0)	C30H59O10P1	C30H58O10P1	-1	Cytosol	C00344	Phosphatidylglycerol/ 3-(3-sn-Phosphatidyl)glycerol/ 3(3-Phosphatidyl-)glycerol/ PtdGro
pg140[c]	Phosphatidylglycerol (ditetradecanoyl, n-C14:0)	C34H67O10P1	C34H66O10P1	-1	Cytosol	C00344	3(3-Phosphatidyl-)glycerol/ PtdGro/ 3-(3-sn-Phosphatidyl)glycerol/ Phosphatidylglycerol
pg141[c]	Phosphatidylglycerol (ditetradec-7-enoyl, n-C14:1)	C34H63O10P1	C34H62O10P1	-1	Cytosol	C00344	PtdGro/ Phosphatidylglycerol/ 3(3-Phosphatidyl-)glycerol/ 3-(3-sn-Phosphatidyl)glycerol
pg160[c]	Phosphatidylglycerol (dihexadecanoyl, n-C16:0)	C38H75O10P1	C38H74O10P1	-1	Cytosol	C00344	3(3-Phosphatidyl-)glycerol/ Phosphatidylglycerol/ PtdGro/ 3-(3-sn-Phosphatidyl)glycerol
pg161[c]	Phosphatidylglycerol (dihexadec-9-enoyl, n-C16:1)	C38H71O10P1	C38H70O10P1	-1	Cytosol	C00344	Phosphatidylglycerol/ 3(3-Phosphatidyl-)glycerol/ PtdGro/ 3-(3-sn-Phosphatidyl)glycerol
pg180[c]	Phosphatidylglycerol (dioctadecanoyl, n-C18:0)	C42H83O10P1	C42H82O10P1	-1	Cytosol	C00344	3(3-Phosphatidyl-)glycerol/ 3-(3-sn-Phosphatidyl)glycerol/ Phosphatidylglycerol/ PtdGro
pg181[c]	Phosphatidylglycerol (dioctadec-11-enoyl, n-C18:1)	C42H79O10P1	C42H78O10P1	-1	Cytosol	C00344	PtdGro/ 3(3-Phosphatidyl-)glycerol/ Phosphatidylglycerol
clpn120[c]	cardiolipin (tetradodecanoyl, n-C12:0)	C57H110O17P2	C57H108O17P2	-2	Cytosol	C05980	Diphosphatidylglycerol/ 1',3'-Bis(1,2-diacyl-sn-glycero-3-phospho)-sn-glycerol
clpn140[c]	cardiolipin (tetratetradecanoyl, n-C14:0)	C65H126O17P2	C65H124O17P2	-2	Cytosol	C05980	1',3'-Bis(1,2-diacyl-sn-glycero-3-phospho)-sn-glycerol/ Diphosphatidylglycerol
clpn141[c]	cardiolipin (tetratetradec-7-enoyl, n-C14:1)	C65H118O17P2	C65H116O17P2	-2	Cytosol	C05980	1',3'-Bis(1,2-diacyl-sn-glycero-3-phospho)-sn-glycerol/ Diphosphatidylglycerol
clpn160[c]	cardiolipin (tetrahexadecanoyl, n-C16:0)	C73H142O17P2	C73H140O17P2	-2	Cytosol	C05980	Diphosphatidylglycerol/ 1',3'-Bis(1,2-diacyl-sn-glycero-3-phospho)-sn-glycerol
clpn161[c]	cardiolipin (tetrahexadec-9-enoyl, n-C16:1)	C73H134O17P2	C73H132O17P2	-2	Cytosol	C05980	Diphosphatidylglycerol/ 1',3'-Bis(1,2-diacyl-sn-glycero-3-phospho)-sn-glycerol
clpn180[c]	cardiolipin (tetraoctadecanoyl, n-C18:0)	C81H158O17P2	C81H156O17P2	-2	Cytosol	C05980	Diphosphatidylglycerol/ 1',3'-Bis(1,2-diacyl-sn-glycero-3-phospho)-sn-glycerol
clpn181[c]	cardiolipin (tetraoctadec-11-enoyl, n-C18:1)	C81H150O17P2	C81H148O17P2	-2	Cytosol	C05980	1',3'-Bis(1,2-diacyl-sn-glycero-3-phospho)-sn-glycerol/ Diphosphatidylglycerol
pe120[c]	phosphatidylethanolamine (didodecanoyl, n-C12:0)	C29H58N1O8P1	C29H58N1O8P1	0	Cytosol	C00350	Cephalin/ (3-Phosphatidyl)ethanolamine/ (3-Phosphatidyl)-ethanolamine
pe140[c]	phosphatidylethanolamine (ditetradecanoyl, n-C14:0)	C33H66N1O8P1	C33H66N1O8P1	0	Cytosol	C00350	(3-Phosphatidyl)ethanolamine/ Cephalin/ (3-Phosphatidyl)-ethanolamine
pe141[c]	phosphatidylethanolamine (ditetradec-7-enoyl, n-C14:1)	C33H62N1O8P1	C33H62N1O8P1	0	Cytosol	C00350	(3-Phosphatidyl)ethanolamine/ (3-Phosphatidyl)-ethanolamine/ Cephalin
pe160[c]	phosphatidylethanolamine (dihexadecanoyl, n-C16:0)	C37H74N1O8P1	C37H74N1O8P1	0	Cytosol	C00350	Cephalin/ (3-Phosphatidyl)-ethanolamine/ (3-Phosphatidyl)ethanolamine
pe161[c]	phosphatidylethanolamine (dihexadec-9enoyl, n-C16:1)	C37H70N1O8P1	C37H70N1O8P1	0	Cytosol	C00350	(3-Phosphatidyl)ethanolamine/ (3-Phosphatidyl)-ethanolamine/ Cephalin
pe180[c]	phosphatidylethanolamine (dioctadecanoyl, n-C18:0)	C41H82N1O8P1	C41H82N1O8P1	0	Cytosol	C00350	Cephalin/ (3-Phosphatidyl)-ethanolamine/ (3-Phosphatidyl)ethanolamine
pe181[c]	phosphatidylethanolamine (dioctadec-11-enoyl, n-C18:1)	C41H78N1O8P1	C41H78N1O8P1	0	Cytosol	C00350	(3-Phosphatidyl)-ethanolamine/ (3-Phosphatidyl)ethanolamine/ Cephalin
penme120[c]	Phosphatidyl-N-methylethanolamine	C30H60N1O8P1	C30H60N1O8P1	0	Cytosol	C01241
penme140[c]	Phosphatidyl-N-methylethanolamine	C34H68N1O8P1	C34H68N1O8P1	0	Cytosol	C01241
penme141[c]	Phosphatidyl-N-methylethanolamine	C34H64N1O8P1	C34H64N1O8P1	0	Cytosol	C01241
penme160[c]	Phosphatidyl-N-methylethanolamine	C38H76N1O8P1	C38H76N1O8P1	0	Cytosol	C01241
penme161[c]	Phosphatidyl-N-methylethanolamine	C38H72N1O8P1	C38H72N1O8P1	0	Cytosol	C01241
penme180[c]	Phosphatidyl-N-methylethanolamine	C42H84N1O8P1	C42H84N1O8P1	0	Cytosol	C01241
penme181[c]	Phosphatidyl-N-methylethanolamine	C42H80N1O8P1	C42H80N1O8P1	0	Cytosol	C01241
pendme120[c]	Phosphatidyl-N-dimethylethanolamine	C31H62N1O8P1	C31H62N1O8P1	0	Cytosol	C04308
pendme140[c]	Phosphatidyl-N-dimethylethanolamine	C35H70N1O8P1	C35H70N1O8P1	0	Cytosol	C04308
pendme141[c]	Phosphatidyl-N-dimethylethanolamine	C35H66N1O8P1	C35H66N1O8P1	0	Cytosol	C04308
pendme160[c]	Phosphatidyl-N-dimethylethanolamine	C39H78N1O8P1	C39H78N1O8P1	0	Cytosol	C04308
pendme161[c]	Phosphatidyl-N-dimethylethanolamine	C39H74N1O8P1	C39H74N1O8P1	0	Cytosol	C04308
pendme180[c]	Phosphatidyl-N-dimethylethanolamine	C43H86N1O8P1	C43H86N1O8P1	0	Cytosol	C04308
pendme181[c]	Phosphatidyl-N-dimethylethanolamine	C43H82N1O8P1	C43H82N1O8P1	0	Cytosol	C04308
pc120[c]	Phosphatidylcholine	C32H64N1O8P1	C32H64N1O8P1	0	Cytosol	C00157	Lecithin/Phosphatidyl-N-trimethylethanolamine/Choline phosphatide
pc140[c]	Phosphatidylcholine	C36H72N1O8P1	C36H72N1O8P1	0	Cytosol	C00157	Lecithin/Phosphatidyl-N-trimethylethanolamine/Choline phosphatide
pc141[c]	Phosphatidylcholine	C36H68N1O8P1	C36H68N1O8P1	0	Cytosol	C00159	Lecithin/Phosphatidyl-N-trimethylethanolamine/Choline phosphatide
pc160[c]	Phosphatidylcholine	C40H80N1O8P1	C40H80N1O8P1	0	Cytosol	C00160	Lecithin/Phosphatidyl-N-trimethylethanolamine/Choline phosphatide
pc161[c]	Phosphatidylcholine	C40H76N1O8P1	C40H76N1O8P1	0	Cytosol	C00161	Lecithin/Phosphatidyl-N-trimethylethanolamine/Choline phosphatide
pc180[c]	Phosphatidylcholine	C44H88N1O8P1	C44H88N1O8P1	0	Cytosol	C00162	Lecithin/Phosphatidyl-N-trimethylethanolamine/Choline phosphatide
pc181[c]	Phosphatidylcholine	C44H84N1O8P1	C44H84N1O8P1	0	Cytosol	C00163	Lecithin/Phosphatidyl-N-trimethylethanolamine/Choline phosphatide
g3pc[c]	sn-Glycero-3-phosphocholine	C8H20NO6P	C8H20NO6P	0	Cytosol	C00670	Glycerophosphocholine
chol[c]	Choline	C5H13NO	C5H14NO	1	Cytosol	C00114	Bilineurine
g3pe[c]	sn-Glycero-3-phosphoethanolamine	C5H14NO6P	C5H14NO6P	0	Cytosol	C01233	Glycerophosphoethanolamine
etha[c]	Ethanolamine	C2H7NO	C2H8NO	1	Cytosol	C00189	Aminoethanol/ Hydroxyethylamine
adprib[c]	ADPribose	C15H23N5O14P2	C15H21N5O14P2	-2	Cytosol	C00301	ADP-D-ribose/ ADP-ribose/ adenosine diphosphate ribose/ adenine-diphosphate-ribose
pram[c]	5-Phospho-beta-D-ribosylamine	C5H12NO7P	C5H11NO7P	-1	Cytosol	C03090	5-Phosphoribosylamine/ 5-Phospho-D-ribosylamine/ 5-Phosphoribosyl-1-amine
gar[c]	N1-(5-Phospho-D-ribosyl)glycinamide	C7H15N2O8P	C7H14N2O8P	-1	Cytosol	C03838	5'-Phosphoribosylglycinamide/ GAR/ Glycinamide ribonucleotide
gly[c]	Glycine	C2H5NO2	C2H5NO2	0	Cytosol	C00037	Aminoacetic acid/ Gly
10fthf[c]	10-Formyltetrahydrofolate	C20H23N7O7	C20H21N7O7	-2	Cytosol	C00234	10-Formyl-THF
fgam[c]	N2-Formyl-N1-(5-phospho-D-ribosyl)glycinamide	C8H15N2O9P	C8H13N2O9P	-2	Cytosol	C04376	5'-Phosphoribosyl-N-formylglycinamide/ N-Formyl-GAR/ N-Formylglycinamide ribonucleotide
thf[c]	5,6,7,8-Tetrahydrofolate	C19H23N7O6	C19H21N7O6	-2	Cytosol	C00101	(6S)-Tetrahydrofolic acid/ (6S)-THFA/ Tetrahydrofolic acid/ THF/ Tetrahydrofolate/ (6S)-Tetrahydrofolate
fpram[c]	2-(Formamido)-N1-(5-phospho-D-ribosyl)acetamidine	C8H16N3O8P	C8H15N3O8P	-1	Cytosol	C04640	2-(Formamido)-N1-(5'-phosphoribosyl)acetamidine/ 1-(5'-Phosphoribosyl)-N-formylglycinamidine/ 5'-Phosphoribosyl-N-formylglycinamidine/ 5'-Phosphoribosylformylglycinamidine
air[c]	5-amino-1-(5-phospho-D-ribosyl)imidazole	C8H14N3O7P	C8H12N3O7P	-2	Cytosol	C03373	Aminoimidazole ribotide/ AIR/ 1-(5'-Phosphoribosyl)-5-aminoimidazole/ 5'-Phosphoribosyl-5-aminoimidazole/ 1-(5-Phospho-D-ribosyl)-5-aminoimidazole
5caiz[c]	5-phosphoribosyl-5-carboxyaminoimidazole	C9H14N3O9P	C9H11N3O9P	-3	Cytosol	C15667	NCAIR
5aizc[c]	5-amino-1-(5-phospho-D-ribosyl)imidazole-4-carboxylate	C9H14N3O9P	C9H11N3O9P	-3	Cytosol	C04751	1-(5-Phospho-D-ribosyl)-5-amino-4-imidazolecarboxylate/ 1-(5'-Phosphoribosyl)-5-amino-4-imidazolecarboxylate/ 1-(5'-Phosphoribosyl)-5-amino-4-carboxyimidazole/ 5'-Phosphoribosyl-4-carboxy-5-aminoimidazole/ 1-(5'-Phosphoribosyl)-4-carboxy-5-aminoimidazole/ 5'-Phosphoribosyl-5-amino-4-imidazolecarboxylate
asp-L[c]	L-Aspartate	C4H7NO4	C4H6NO4	-1	Cytosol	C00049	2-aminosuccinic acid/ L-Aspartic acid/ Asp
25aics[c]	(S)-2-[5-Amino-1-(5-phospho-D-ribosyl)imidazole-4-carboxamido]succinate	C13H19N4O12P	C13H15N4O12P	-4	Cytosol	C04823	1-(5'-Phosphoribosyl)-5-amino-4-(N-succinocarboxamide)-imidazole/ 1-(5'-Phosphoribosyl)-4-(N-succinocarboxamide)-5-aminoimidazole/ 5'-Phosphoribosyl-4-(N-succinocarboxamide)-5-aminoimidazole
aicar[c]	5-Amino-1-(5-Phospho-D-ribosyl)imidazole-4-carboxamide	C9H15N4O8P	C9H13N4O8P	-2	Cytosol	C04677	5-Phosphoribosyl-4-carbamoyl-5-aminoimidazole/ 1-(5'-Phosphoribosyl)-5-amino-4-imidazolecarboxamide/ 5'-Phosphoribosyl-5-amino-4-imidazolecarboxamide/ AICAR/ 5'-Phospho-ribosyl-5-amino-4-imidazole carboxamide/ 5-Aminoimidazole-4-carboxamide ribotide
fprica[c]	5-Formamido-1-(5-phospho-D-ribosyl)imidazole-4-carboxamide	C10H15N4O9P	C10H13N4O9P	-2	Cytosol	C04734	1-(5'-Phosphoribosyl)-5-formamido-4-imidazolecarboxamide/ 5'-Phosphoribosyl-5-formamido-4-imidazolecarboxamide/ 5-Formamido-1-(5-phosphoribosyl)imidazole-4-carboxamide
imp[c]	IMP	C10H13N4O8P	C10H11N4O8P	-2	Cytosol	C00130	Inosinic acid/ Inosine monophosphate/ Inosine 5'-monophosphate/ Inosine 5'-phosphate/ 5'-Inosinate/ 5'-Inosinic acid/ 5'-Inosine monophosphate
gtp[c]	GTP	C10H16N5O14P3	C10H12N5O14P3	-4	Cytosol	C00044	Guanosine 5'-triphosphate
ditp[c]	dITP	C10H15N4O13P3	C10H11N4O13P3	-4	Cytosol	C01345	2'-Deoxyinosine-5'-triphosphate/ 2'-Deoxyinosine 5'-triphosphate
dimp[c]	dIMP	C10H13N4O7P	C10H11N4O7P	-2	Cytosol	C06196	2'-Deoxyinosine 5'-phosphate
itp[c]	ITP	C10H15N4O14P3	C10H11N4O14P3	-4	Cytosol	C00081	Inosine 5'-triphosphate/ Inosine triphosphate/ Inosine tripolyphosphate
dcamp[c]	N6-(1,2-Dicarboxyethyl)-AMP	C14H18N5O11P	C14H14N5O11P	-4	Cytosol	C03794	Adenylosuccinate/ Adenylosuccinic acid
adn[c]	Adenosine	C10H13N5O4	C10H13N5O4	0	Cytosol	C00212	9-beta-D-Ribofuranosyladenine/ Adenocard/ 9-B-D-ribofuranosyl-9H-purin-6-amine/ rA/ Adenine riboside
ins[c]	Inosine	C10H12N4O5	C10H12N4O5	0	Cytosol	C00294	Hypoxanthine ribonucleoside
datp[c]	dATP	C10H16N5O12P3	C10H12N5O12P3	-4	Cytosol	C00131	2'-Deoxyadenosine 5'-triphosphate/ Deoxyadenosine 5'-triphosphate/ Deoxyadenosine triphosphate
dadp[c]	dADP	C10H15N5O9P2	C10H12N5O9P2	-3	Cytosol	C00206	2'-Deoxyadenosine 5'-diphosphate
damp[c]	dAMP	C10H14N5O6P	C10H12N5O6P	-2	Cytosol	C00360	2'-Deoxyadenosine 5'-phosphate/ 2'-Deoxyadenosine 5'-monophosphate/ Deoxyadenylic acid/ Deoxyadenosine monophosphate
dad-2[c]	Deoxyadenosine	C10H13N5O3	C10H13N5O3	0	Cytosol	C00559	2'-Deoxyadenosine/ dA
din[c]	Deoxyinosine	C10H12N4O4	C10H12N4O4	0	Cytosol	C05512	2'-deoxy-inosine
xmp[c]	Xanthosine 5'-phosphate	C10H13N4O9P	C10H11N4O9P	-2	Cytosol	C00655	XMP/ Xanthylic acid/ (9-D-Ribosylxanthine)-5'-phosphate
xtsn[c]	Xanthosine	C10H12N4O6	C10H12N4O6	0	Cytosol	C01762
xtp[c]	XTP	C10H15N4O15P3	C10H11N4O15P3	-4	Cytosol	C00700
gmp[c]	GMP	C10H14N5O8P	C10H12N5O8P	-2	Cytosol	C00144	Guanosine 5'-phosphate/ Guanosine monophosphate/ Guanosine 5'-monophosphate/ Guanylic acid
gsn[c]	Guanosine	C10H13N5O5	C10H13N5O5	0	Cytosol	C00387	rG/ Guanine riboside
ppgpp[c]	Guanosine 3',5'-bis(diphosphate)	C10H17N5O17P4	C10H11N5O17P4	-6	Cytosol	C01228	Guanosine 3'-diphosphate 5'-diphosphate/ Guanosine 5'-diphosphate,3'-diphosphate/ gdpdp/ ppGpp
gdptp[c]	Guanosine 3'-diphosphate 5'-triphosphate	C10H18N5O20P5	C10H11N5O20P5	-7	Cytosol	C04494	guanosine 5'-diphosphate 3'-triphosphate/ pppGpp
dgdp[c]	dGDP	C10H15N5O10P2	C10H12N5O10P2	-3	Cytosol	C00361	2'-Deoxyguanosine 5'-diphosphate
dgtp[c]	dGTP	C10H16N5O13P3	C10H12N5O13P3	-4	Cytosol	C00286	2'-Deoxyguanosine 5'-triphosphate/ Deoxyguanosine 5'-triphosphate/ Deoxyguanosine triphosphate
dgmp[c]	dGMP	C10H14N5O7P	C10H12N5O7P	-2	Cytosol	C00362	2'-Deoxyguanosine 5'-monophosphate/ 2'-Deoxyguanosine 5'-phosphate/ Deoxyguanylic acid/ Deoxyguanosine monophosphate
dgsn[c]	Deoxyguanosine	C10H13N5O4	C10H13N5O4	0	Cytosol	C00330	2'-deoxyguanosine hemihydrate/ 2'-Deoxyguanosine
gua[c]	Guanine	C5H5N5O	C5H5N5O	0	Cytosol	C00242	2-Aminohypoxanthine/ G/ 2-Amino-6-hydroxypurine
xan[c]	Xanthine	C5H4N4O2	C5H4N4O2	0	Cytosol	C00385	2,6-Dioxopurine
cbp[c]	Carbamoyl phosphate	CH4NO5P	CH2NO5P	-2	Cytosol	C00169
cbasp[c]	N-Carbamoyl-L-aspartate	C5H8N2O5	C5H6N2O5	-2	Cytosol	C00438
dhor-S[c]	(S)-Dihydroorotate	C5H6N2O4	C5H5N2O4	-1	Cytosol	C00337	L-Dihydroorotate/ L-Dihydroorotic acid/ Dihydro-L-orotic acid/ (S)-4/ 5-Dihydroorotate
orot[c]	Orotate	C5H4N2O4	C5H3N2O4	-1	Cytosol	C00295	Orotic acid/ Uracil-6-carboxylic acid
orot5p[c]	Orotidine 5'-phosphate	C10H13N2O11P	C10H10N2O11P	-3	Cytosol	C01103	Orotidylic acid
ump[c]	UMP	C9H13N2O9P	C9H11N2O9P	-2	Cytosol	C00105	Uridylic acid/ Uridine monophosphate/ Uridine 5'-monophosphate/ 5'Uridylic acid
udp[c]	UDP	C9H14N2O12P2	C9H11N2O12P2	-3	Cytosol	C00015	Uridine 5'-diphosphate/ uridine diphosphate/ 5'-uridylate diphosphate
uri[c]	Uridine	C9H12N2O6	C9H12N2O6	0	Cytosol	C00299
cytd[c]	Cytidine	C9H13N3O5	C9H13N3O5	0	Cytosol	C00475	4-amino-1-beta-D-ribofuranosyl-2(1H)-pyrimidinone/ 1-beta-ribofuranosylosine/ cytosine riboside
ctp[c]	CTP	C9H16N3O14P3	C9H12N3O14P3	-4	Cytosol	C00063	Cytidine 5'-triphosphate/ Cytidine triphosphate
cdp[c]	CDP	C9H15N3O11P2	C9H12N3O11P2	-3	Cytosol	C00112	Cytidine 5'-diphosphate/ Cytidine diphosphate
dcdp[c]	dCDP	C9H15N3O10P2	C9H12N3O10P2	-3	Cytosol	C00705	2'-Deoxycytidine diphosphate/ 2'-Deoxycytidine 5'-diphosphate
dctp[c]	dCTP	C9H16N3O13P3	C9H12N3O13P3	-4	Cytosol	C00458	Deoxycytidine 5'-triphosphate/ Deoxycytidine triphosphate/ 2'-Deoxycytidine 5'-triphosphate
dutp[c]	dUTP	C9H15N2O14P3	C9H11N2O14P3	-4	Cytosol	C00460	2'-Deoxyuridine 5'-triphosphate
dcmp[c]	dCMP	C9H14N3O7P	C9H12N3O7P	-2	Cytosol	C00239	Deoxycytidylic acid/ Deoxycytidine monophosphate/ Deoxycytidylate/ 2'-Deoxycytidine 5'-monophosphate
dcyt[c]	Deoxycytidine	C9H13N3O4	C9H13N3O4	0	Cytosol	C00881	2'-Deoxycytidine/ dC
duri[c]	Deoxyuridine	C9H12N2O5	C9H12N2O5	0	Cytosol	C00526	2-Deoxyuridine/ 2'-Deoxyuridine
dump[c]	dUMP	C9H13N2O8P	C9H11N2O8P	-2	Cytosol	C00365	Deoxyuridylic acid/ Deoxyuridine monophosphate/ Deoxyuridine 5'-phosphate/ 2'-Deoxyuridine 5'-phosphate
mlthf[c]	5,10-Methylenetetrahydrofolate	C20H23N7O6	C20H21N7O6	-2	Cytosol	C00143	N5,N10-methylene-tetrahydrofolate/ N5,N10-methylene-5,6,7,8-tetrahydrofolate/ 5,10-methylene-5,6,7,8-tetrahydrofolate
dhf[c]	7,8-Dihydrofolate	C19H21N7O6	C19H19N7O6	-2	Cytosol	C00415	7,8-Dihydrofolic acid/ Dihydrofolate/ Dihydrofolic acid
dtmp[c]	dTMP	C10H15N2O8P	C10H13N2O8P	-2	Cytosol	C00364	Thymidine 5'-phosphate/ Deoxythymidine 5'-phosphate/ Thymidylic acid/ 5'-Thymidylic acid/ Thymidine monophosphate/ Deoxythymidylic acid/ Thymidylate
thymd[c]	Thymidine	C10H14N2O5	C10H14N2O5	0	Cytosol	C00214	dT/ 2'-Deoxythymidine/ Deoxythymidine
dtdp[c]	dTDP	C10H16N2O11P2	C10H13N2O11P2	-3	Cytosol	C00363	Thymidine 5'-diphosphate
dudp[c]	dUDP	C9H14N2O11P2	C9H11N2O11P2	-3	Cytosol	C01346	2'-Deoxyuridine 5'-diphosphate
ala-L[c]	L-Alanine	C3H7NO2	C3H7NO2	0	Cytosol	C00041	L-2-Aminopropionic acid/ L-alpha-Alanine
citr-L[c]	L-Citrulline	C6H13N3O3	C6H13N3O3	0	Cytosol	C00327	2-Amino-5-ureidovaleric acid/ N5-(aminocarbonyl)-L-Ornithine/ Citrulline
argsuc[c]	N(omega)-(L-Arginino)succinate	C10H18N4O6	C10H17N4O6	-1	Cytosol	C03406	N-(L-Arginino)succinate/ L-Argininosuccinate/ L-Argininosuccinic acid/ L-Arginosuccinic acid
arg-L[c]	L-Arginine	C6H14N4O2	C6H15N4O2	1	Cytosol	C00062	(S)-2-Amino-5-guanidinovaleric acid/ Arginine/ Arg
asn-L[c]	L-Asparagine	C4H8N2O3	C4H8N2O3	0	Cytosol	C00152	Arg/ 2-Amino-3-carbamoylpropanoic acid/ 2-Aminosuccinamic acid
3php[c]	3-Phosphohydroxypyruvate	C3H5O7P	C3H2O7P	-3	Cytosol	C03232	3-Phosphohydroxypyruvic acid/ 3-Phosphonooxypyruvate/ 3-Phosphonooxypyruvic acid
pser-L[c]	O-Phospho-L-serine	C3H8NO6P	C3H6NO6P	-2	Cytosol	C01005	3-Phosphoserine
trp-L[c]	L-Tryptophan	C11H12N2O2	C11H12N2O2	0	Cytosol	C00078	(S)-alpha-amino-beta-(3-indolyl)-propionic acid
5aop[c]	5-Amino-4-oxopentanoate	C5H9NO3	C5H9NO3	0	Cytosol	C00430	5-Aminolevulinate/ 5-Amino-4-oxovaleric acid
athr-L[c]	L-Allo-threonine	C4H9NO3	C4H9NO3	0	Cytosol	C05519	L-Allothreonine
thr-L[c]	L-Threonine	C4H9NO3	C4H9NO3	0	Cytosol	C00188	Thr/ 2-Amino-3-hydroxybutyric acid
phom[c]	O-Phospho-L-homoserine	C4H10NO6P	C4H8NO6P	-2	Cytosol	C01102
hom-L[c]	L-Homoserine	C4H9NO3	C4H9NO3	0	Cytosol	C00263	2-Amino-4-hydroxybutyric acid
aspsa[c]	L-Aspartate 4-semialdehyde	C4H7NO3	C4H7NO3	0	Cytosol	C00441	Aspartate beta-semialdehyde/ L-Aspartic 4-semialdehyde
4pasp[c]	4-Phospho-L-aspartate	C4H8NO7P	C4H6NO7P	-2	Cytosol	C03082	L-4-Aspartyl phosphate
cyst-L[c]	L-Cystathionine	C7H14N2O4S	C7H14N2O4S	0	Cytosol	C02291
hcys-L[c]	L-Homocysteine	C4H9NO2S	C4H9NO2S	0	Cytosol	C00155	L-2-Amino-4-mercaptobutyric acid/ L-Homocysteine
achms[c]	O-Acetyl-L-homoserine	C6H11NO4	C6H11NO4	0	Cytosol	C01077	O-Acetylhomoserine
suchms[c]	O-Succinyl-L-homoserine	C8H13NO6	C8H12NO6	-1	Cytosol	C01118
ahcys[c]	S-Adenosyl-L-homocysteine	C14H20N6O5S	C14H20N6O5S	0	Cytosol	C00021	S-Adenosylhomocysteine
5mthf[c]	5-Methyltetrahydrofolate	C20H25N7O6	C20H24N7O6	-1	Cytosol	C00440	N5-methyl-tetrahydrofolate/ N5-methyl-5,6,7,8-tetrahydrofolate/ 5-methyl-5,6,7,8-tetrahydrofolate
met-L[c]	L-Methionine	C5H11NO2S	C5H11NO2S	0	Cytosol	C00073	Met/ L-2-Amino-4methylthiobutyric acid
mtglu[c]	5-Methyltetrahydropteroyltri-L-glutamate	C30H39N9O12	C30H35N9O12	-4	Cytosol	C04489
tglu[c]	Tetrahydropteroyltri-L-glutamate	C29H37N9O12	C29H37N9O12	0	Cytosol	C04144	(6S)-H4PteGlu3
amet[c]	S-Adenosyl-L-methionine	C15H23N6O5S	C15H23N6O5S	1	Cytosol	C00019	S-Adenosylmethionine/ Acylcarnitine
ile-L[c]	L-Isoleucine	C6H13NO2	C6H13NO2	0	Cytosol	C00407	2-Amino-3-methylvaleric acid/ Ile
val-L[c]	L-Valine	C5H11NO2	C5H11NO2	0	Cytosol	C00183	2-Aminoisovaleric acid/ Val/ 2-Amino-3-methylbutyric acid
leu-L[c]	L-Leucine	C6H13NO2	C6H13NO2	0	Cytosol	C00123	2-amino-4-methylvaleric acid/ Leu
3mop[c]	(S)-3-Methyl-2-oxopentanoate	C6H10O3	C6H9O3	-1	Cytosol	C00671	(R)-2-oxo-3-methylpentanoate/ 2-oxo-3-methylpentanoate/ alpha-keto-beta-methylvalerate/ (S)-2-oxo-3-methylpentanoate/ ketoisoleucine/ alpha-oxo-beta-methylvalerate
3mob[c]	3-Methyl-2-oxobutanoate	C5H8O3	C5H7O3	-1	Cytosol	C00141	2-Oxoisovalerate/ alpha-Ketovaline/ 2-Oxo-3-methylbutanoate/ 2-Oxoisopentanoate/ 3-Methyl-2-oxobutyric acid/ 2-Ketovaline/ 2-Keto-3-methylbutyric acid
4mop[c]	4-Methyl-2-oxopentanoate	C6H10O3	C6H9O3	-1	Cytosol	C00233	alpha-ketoisocaproate/ 2-Oxoisocaproate
3c2hmp[c]	3-Carboxy-2-hydroxy-4-methylpentanoate	C7H12O5	C7H10O5	-2	Cytosol	C04411	3-Isopropylmalate/ 2-D-threo-hydroxy-3-carboxy-isocaproate
3c4mop[c]	3-Carboxy-4-methyl-2-oxopentanoate	C7H10O5	C7H8O5	-2	Cytosol	C04236	2-Oxo-4-methyl-3-carboxypentanoate/ (2S)-2-Isopropyl-3-oxosuccinate
2ippm[c]	2-Isopropylmaleate	C7H10O4	C7H8O4	-2	Cytosol	C02631	beta-isopropylmaleate
3c3hmp[c]	3-Carboxy-3-hydroxy-4-methylpentanoate	C7H12O5	C7H10O5	-2	Cytosol	C02504	2-Isopropylmalate/ 2-Isopropylmalic acid/ 3-Carboxy-3-hydroxy-isocaproate/ 3-Carboxy-3-hydroxyisocaproate
2ahbut[c]	(S)-2-Aceto-2-hydroxybutanoate	C6H10O4	C6H9O4	-1	Cytosol	C06006
23dhmb[c]	(R)-2,3-Dihydroxy-3-methylbutanoate	C5H10O4	C5H9O4	-1	Cytosol	C04272	(R)-2,3-Dihydroxy-isovaleric acid/ (R)-2,3-Dihydroxy-isovalerate
23dhmp[c]	(R)-2,3-Dihydroxy-3-methylpentanoate	C6H12O4	C6H11O4	-1	Cytosol	C06007	2,3-Dihydroxy-3-methylvalerate
23dhdp[c]	2,3-Dihydrodipicolinate	C7H7NO4	C7H5NO4	-2	Cytosol	C03340	Dihydrodipicolinic acid
thdp[c]	2,3,4,5-Tetrahydrodipicolinate	C7H9NO4	C7H7NO4	-2	Cytosol	C03972	(R)-2,3,4,5-tetrahydropyridine-2,6-dicarboxylate/ delta1-Piperidine-2,6-dicarboxylate
sl2a6o[c]	N-Succinyl-2-L-amino-6-oxoheptanedioate	C11H15NO8	C11H12NO8	-3	Cytosol	C04462	N-Succinyl-L-2-amino-6-oxoheptanedioate/ N-Succinyl-L-2-amino-6-oxopimelate/ N-Succinyl-2-amino-6-oxo-L-pimelic acid/ N-Succinyl-epsilon-keto-L-aminopimelic acid
sl26da[c]	N-Succinyl-LL-2,6-diaminoheptanedioate	C11H18N2O7	C11H16N2O7	-2	Cytosol	C04421	N-Succinyl-LL-2,6-diaminopimelate/ N-Succinyl-L-2,6-diaminoheptanedioate/ N-Succinyl-L-2,6-diaminopimelate
26dap-LL[c]	LL-2,6-Diaminoheptanedioate	C7H14N2O4	C7H14N2O4	0	Cytosol	C00666	LL-2,6-Diaminopimelic acid/ LL-2,6-Diaminopimelate
26dap-M[c]	meso-2,6-Diaminoheptanedioate	C7H14N2O4	C7H14N2O4	0	Cytosol	C00680	meso-2,6-Diaminopimelic acid/ meso-2,6-Diaminopimelate
lys-L[c]	L-Lysine	C6H14N2O2	C6H15N2O2	1	Cytosol	C00047	Lys/ 2,6-diaminohexanoic acid/ Lysine acid
uamag[c]	UDP-N-acetylmuramoyl-L-alanyl-D-glutamate	C28H43N5O23P2	C28H39N5O23P2	-4	Cytosol	C00692
ugmd[c]	UDP-N-acetylmuramoyl-L-alanyl-D-gamma-glutamyl-meso-2,6-diaminopimelate	C35H55N7O26P2	C35H51N7O26P2	-4	Cytosol	C04877	UDP-N-acetylmuramoyl-L-alanyl-D-gamma-glutamyl-meso-2,6-diaminoheptanedioate/ UDP-MurNac-tripeptide
alaala[c]	D-Alanyl-D-alanine	C6H12N2O3	C6H12N2O3	0	Cytosol	C00993	DalaDala/ D-ala-D-ala
ugmda[c]	UDP-N-acetylmuramoyl-L-alanyl-D-glutamyl-meso-2,6-diaminopimeloyl-D-alanyl-D-alanine	C41H65N9O28P2	C41H61N9O28P2	-4	Cytosol	C04882	UDP-N-acetylmuramoyl-L-alanyl-D-glutamyl-6-carboxy-L-lysyl-D-alanyl-D-alanine
orn[c]	Ornithine	C5H12N2O2	C5H13N2O2	1	Cytosol	C01602	2,5-Diaminovaleric acid/ 2,5-Diaminopentanoic acid/ 2,5-Diaminopentanoate/ L-Ornithine
urea[c]	Urea	CH4N2O	CH4N2O	0	Cytosol	C00086	Carbonyl diamine/ Carbamimidic acid/ aquadrate/ Isourea/ Carbamide
acglu[c]	N-Acetyl-L-glutamate	C7H11NO5	C7H9NO5	-2	Cytosol	C00624	N-Acetyl-L-glutamic acid
acg5p[c]	N-Acetyl-L-glutamyl 5-phosphate	C7H12NO8P	C7H9NO8P	-3	Cytosol	C04133	N-Acetyl-L-glutamate 5-phosphate
acg5sa[c]	N-Acetyl-L-glutamate 5-semialdehyde	C7H11NO4	C7H10NO4	-1	Cytosol	C01250	2-Acetamido-5-oxopentanoate
acorn[c]	N2-Acetyl-L-ornithine	C7H14N2O3	C7H14N2O3	0	Cytosol	C00437
glu5p[c]	L-Glutamate 5-phosphate	C5H10NO7P	C5H8NO7P	-2	Cytosol	C03287	L-Glutamyl 5-phosphate
glu5sa[c]	L-Glutamate 5-semialdehyde	C5H9NO3	C5H9NO3	0	Cytosol	C01165	L-Glutamate gamma-semialdehyde
1pyr5c[c]	1-Pyrroline-5-carboxylate	C5H7NO2	C5H6NO2	-1	Cytosol	C03912	(S)-1-Pyrroline-5-carboxylate/ L-1-Pyrroline-5-carboxylate/ 1-Pyrroline-5-carboxylic acid
pro-L[c]	L-Proline	C5H9NO2	C5H9NO2	0	Cytosol	C00148	Pro/ 2-Pyrrolidinecarboxylic acid
ptrc[c]	Putrescine	C4H12N2	C4H14N2	2	Cytosol	C00134	1,4-Diaminobutane/ 1,4-Butanediamine/ Tetramethylenediamine
sucglu[c]	N2-Succinyl-L-glutamate	C9H13NO7	C9H10NO7	-3	Cytosol	C05931	N2-Succinyl-L-glutamate
sucgsa[c]	N2-Succinyl-L-glutamate 5-semialdehyde	C9H13NO6	C9H11NO6	-2	Cytosol	C05932	N2-Succinyl-L-glutamate 5-semialdehyde
sucorn[c]	N2-Succinyl-L-ornithine	C9H16N2O5	C9H15N2O5	-1	Cytosol	C03415	N2-Succinyl-L-ornithine
sucarg[c]	N2-Succinyl-L-arginine	C10H18N4O5	C10H17N4O5	-1	Cytosol	C03296	N2-Succinyl-L-arginine
agm[c]	Agmatine	C5H14N4	C5H16N4	2	Cytosol	C00179	(4-Aminobutyl) guanidine
cbptrc[c]	N-Carbamoylputrescine	C5H13N3O	C5H14N3O	1	Cytosol	C00436
prbatp[c]	1-(5-Phosphoribosyl)-ATP	C15H25N5O20P4	C15H19N5O20P4	-6	Cytosol	C02739	Phosphoribosyl-ATP/ N1-(5-Phospho-D-ribosyl)-ATP
prbamp[c]	1-(5-Phosphoribosyl)-AMP	C15H23N5O14P2	C15H19N5O14P2	-4	Cytosol	C02741	Phosphoribosyl)-AMP
prfp[c]	1-(5-Phosphoribosyl)-5-[(5-phosphoribosylamino)methylideneamino]imidazole-4-carboxamide	C15H25N5O15P2	C15H21N5O15P2	-4	Cytosol	C04896	Phosphoribosyl-formimino-AICAR-phosphate/ N-(5'-Phospho-D-ribosylformimino)-5-amino-1-(5'-phospho-D-ribosyl)-4-imidazolecarboxamide / 5-(5-Phospho-D-ribosylaminoformimino)-1-(5-phosphoribosyl)-imidazole-4-carboxamide/ 5-[(5-Phospho-1-deoxyribulos-1-ylamino)methylideneamino]-1-(5-phosphoribosyl)imidazole-4-carboxamide/ N-(5'-Phospho-D-ribosylformimino)-5-amino-1-(5''-phospho-D-ribosyl)-4-imidazole…
prlp[c]	5-[(5-phospho-1-deoxyribulos-1-ylamino)methylideneamino]-1-(5-phosphoribosyl)imidazole-4-carboxamide	C15H25N5O15P2	C15H21N5O15P2	-4	Cytosol	C04916	N-(5'-Phosphoribulosylformimino)-5-amino-1-(5''-phosphoribosyl)-4-imidazolecarboxamide/ N-(5'-Phospho-D-1'-ribulosylformimino)-5-amino-1-(5''-phospho-D-ribosyl)-4-imidazolecarboxamide/ Phosphoribulosyl-formimino-AICAR-phosphate
eig3p[c]	D-erythro-1-(Imidazol-4-yl)glycerol 3-phosphate	C6H11N2O6P	C6H9N2O6P	-2	Cytosol	C04666	D-erythro-Imidazole-glycerol 3-phosphate/ D-erythro-Imidazole-glycerol phosphate
imacp[c]	3-(Imidazol-4-yl)-2-oxopropyl phosphate	C6H9N2O5P	C6H7N2O5P	-2	Cytosol	C01267	Imidazole-acetol phosphate
hisp[c]	L-Histidinol phosphate	C6H12N3O4P	C6H11N3O4P	-1	Cytosol	C01100
histd[c]	L-Histidinol	C6H11N3O	C6H12N3O	1	Cytosol	C00860
his-L[c]	L-Histidine	C6H9N3O2	C6H9N3O2	0	Cytosol	C00135	His/ Glyoxaline-5-alanine/ (S)-alpha-Amino-1H-imidazole-4-propionic acid
34hpp[c]	3-(4-Hydroxyphenyl)pyruvate	C9H8O4	C9H7O4	-1	Cytosol	C01179	4-Hydroxyphenylpyruvate/ p-Hydroxyphenylpyruvic acid
phe-L[c]	L-Phenylalanine	C9H11NO2	C9H11NO2	0	Cytosol	C00079	(S)-Phenylalanine/ 3-phenylalanine/ (S)-alpha-amino-beta-phenylpropionic acid
phpyr[c]	Phenylpyruvate	C9H8O3	C9H7O3	-1	Cytosol	C00166	Phenylpyruvic acid/ alpha-Ketohydrocinnamic acid/ keto-Phenylpyruvate/ 3-Phenyl-2-oxopropanoate
2dda7p[c]	2-Dehydro-3-deoxy-D-arabino-heptonate 7-phosphate	C7H13O10P	C7H10O10P	-3	Cytosol	C04691
3dhq[c]	3-Dehydroquinate	C7H10O6	C7H9O6	-1	Cytosol	C00944	5-Dehydroquinate/ 3-Dehydroquinic acid/ 5-Dehydroquinic acid
3dhsk[c]	3-Dehydroshikimate	C7H8O5	C7H7O5	-1	Cytosol	C02637
skm[c]	Shikimate	C7H10O5	C7H9O5	-1	Cytosol	C00493	Shikimic acid/ 3,4,5-Trihydroxy-1-cyclohexenecarboxylic acid
skm5p[c]	Shikimate 5-phosphate	C7H11O8P	C7H8O8P	-3	Cytosol	C03175	Shikimate 3-phosphate
3psme[c]	5-O-(1-Carboxyvinyl)-3-phosphoshikimate	C10H13O10P	C10H9O10P	-4	Cytosol	C01269	O5-(1-Carboxyvinyl)-3-phosphoshikimate/ 3-Phosphate-shikimate
chor[c]	chorismate	C10H10O6	C10H8O6	-2	Cytosol	C00251	chorismic acid
anth[c]	Anthranilate	C7H7NO2	C7H6NO2	-1	Cytosol	C00108	Vitamin L/ Anthranilic acid/ o-Aminobenzoic acid/ Vitamin L1/ 2-Aminobenzoate
pran[c]	N-(5-Phospho-D-ribosyl)anthranilate	C12H16NO9P	C12H13NO9P	-3	Cytosol	C04302	N-(5-Phospho-beta-D-ribosyl)anthranilate/ N-(5-Phosphoribosyl)anthranilic acid
2cpr5p[c]	1-(2-Carboxyphenylamino)-1-deoxy-D-ribulose 5-phosphate	C12H16NO9P	C12H13NO9P	-3	Cytosol	C01302
3ig3p[c]	C'-(3-Indolyl)-glycerol 3-phosphate	C11H14NO6P	C11H12NO6P	-2	Cytosol	C03506	Indoleglycerol phosphate/ 1-(Indol-3-yl)glycerol 3-phosphate/ (3-Indolyl)-glycerol phosphate
indole[c]	Indole	C8H7N	C8H7N	0	Cytosol	C00463	2,3-Benzopyrrole
pphn[c]	Prephenate	C10H10O6	C10H8O6	-2	Cytosol	C00254	Prephenic acid
aro-L[c]	L-Arogenate	C10H13NO5	C10H12NO5	-1	Cytosol	C00826	L-Arogenic acid; Pretyrosine
tyr-L[c]	L-Tyrosine	C9H11NO3	C9H11NO3	0	Cytosol	C00082	(S)-3-(p-Hydroxyphenyl)alanine/ (S)-2-Amino-3-(p-hydroxyphenyl)propionic acid
trnamet[c]	tRNA(Met)	R	R	0	Cytosol	C01647
mettrna[c]	L-Methionyl-tRNA (Met)	C5H9NOSR	C5H10NOSR	1	Cytosol	C02430	L-Methionyl-tRNA
glu-D[c]	D-Glutamate	C5H9NO4	C5H8NO4	-1	Cytosol	C00217	D-Glutamic acid/ D-Glutaminic acid/ D-2-Aminoglutaric acid/ Glu
uama[c]	UDP-N-acetylmuramoyl-L-alanine	C23H36N4O20P2	C23H33N4O20P2	-3	Cytosol	C01212	common abbr: UDP-NAcMur-(L)-Ala
ala-D[c]	D-Alanine	C3H7NO2	C3H7NO2	0	Cytosol	C00133	D-2-Aminopropionic acid
glucys[c]	gamma-L-Glutamyl-L-cysteine	C8H14N2O5S	C8H13N2O5S	-1	Cytosol	C00669	L-gamma-Glutamylcysteine/ 5-L-Glutamyl-L-cysteine
cgly[c]	Cys-Gly	C5H10N2O3S	C5H10N2O3S	0	Cytosol	C01419	L-Cysteinyl-glycine/ CCRIS 2905/ Cysteinylglycine [MeSH: cysteinylglycine]/ cysteinyl-glycine [MeSH: cysteinyl-glycine]/ Glycine, N-cysteinyl/ 19246-18-5/ Cys-Gly [MeSH: Cys-Gly]/ BRN 1724689/ L-Cysteinylglycine
gthox[c]	Oxidized glutathione	C20H32N6O12S2	C20H30N6O12S2	-2	Cytosol	C00127	L-Glutathione oxidized/ Glutathione disulfide
udcpp[c]	Undecaprenyl phosphate	C55H91O4P	C55H89O4P	-2	Cytosol	C00348	di-trans-poly-cis-undecaprenyl-phosphate
udcpdp[c]	Undecaprenyl diphosphate	C55H92O7P2	C55H89O7P2	-3	Cytosol	C04574	Undecaprenyl pyrophosphate
uaagmda[c]	Undecaprenyl-diphospho-N-acetylmuramoyl-(N-acetylglucosamine)-L-ala-D-glu-meso-2,6-diaminopimeloyl-D-ala-D-ala	C95H156N8O28P2	C95H152N8O28P2	-4	Cytosol	C05898	Peptidoglycan Unit (tv)
uagmda[c]	Undecaprenyl-diphospho-N-acetylmuramoyl-L-alanyl-D-glutamyl-meso-2,6-diaminopimeloyl-D-alanyl-D-alanine	C87H143N7O23P2	C87H139N7O23P2	-4	Cytosol	C05897	N-acetylmuramoyl-L-alanyl-D-glutamyl-meso-2,6-diaminoheptane- D-alanyl-D-alanine-diphosphoundecaprenol
4ampm[c]	4-Amino-2-methyl-5-phosphomethylpyrimidine	C6H10N3O4P	C6H8N3O4P	-2	Cytosol	C04556	4-Amino-5-phosphomethyl-2-methylpyrimidine/ 4-amino-2-methyl 5-hydroxymethylpyrimidine phosphate/ HMP-P
4ahmmp[c]	4-Amino-5-hydroxymethyl-2-methylpyrimidine	C6H9N3O	C6H9N3O	0	Cytosol	C01279	Toxopyrimidine/ 4-Amino-2-methyl-5-pyrimidinemethanol
2mahmp[c]	2-Methyl-4-amino-5-hydroxymethylpyrimidine diphosphate	C6H11N3O7P2	C6H8N3O7P2	-3	Cytosol	C04752	4-amino-2-methyl 5-hydroxymethylpyrimidine pyrophosphate/ HMP-PP
4mpetz[c]	4-Methyl-5-(2-phosphoethyl)-thiazole	C6H10NO4PS	C6H8NO4PS	-2	Cytosol	C04327	4-Methyl-5-(2-phosphono-oxyethyl)-thiazole/ 4-methyl-5-(b-hydroxyethyl)thiazole phosphate
thmmp[c]	Thiamin monophosphate	C12H17N4O4PS	C12H16N4O4PS	-1	Cytosol	C01081	Thiamin phosphate/ Thiamine phosphate/ TMP/ Thiamine monophosphate
dxyl5p[c]	1-deoxy-D-xylulose 5-phosphate	C5H11O7P	C5H9O7P	-2	Cytosol	C11437
4crsol[c]	p-Cresol	C7H8O	C7H8O	0	Cytosol	C01468	4-Cresol/ p-Cresol/ 4-Hydroxytoluene
dad-5[c]	5'-Deoxyadenosine	C10H13N5O3	C10H13N5O3	0	Cytosol	C05198
dhgly[c]	dehydroglycine	C2H3NO2	C2H2NO2	-1	Cytosol	C15809	2-iminoacetate
25drapp[c]	2,5-Diamino-6-(ribosylamino)-4-(3H)-pyrimidinone 5'-phosphate	C9H16N5O8P	C9H14N5O8P	-2	Cytosol	C01304
5apru[c]	5-Amino-6-(5'-phosphoribosylamino)uracil	C9H15N4O9P	C9H13N4O9P	-2	Cytosol	C01268	5-Amino-6-(ribosylamino)-2,4-(1H,3H)-pyrimidinedione 5'-phosphate
5aprbu[c]	5-Amino-6-(5'-phosphoribitylamino)uracil	C9H17N4O9P	C9H15N4O9P	-2	Cytosol	C04454	5-amino-6-ribitylamino-2,4(1H,3H)-pyrimidinedione 5'-phosphate
4r5au[c]	4-(1-D-Ribitylamino)-5-aminouracil	C9H16N4O6	C9H16N4O6	0	Cytosol	C04732	4-(1-D-Ribitylamino)-5-amino-2,6-dihydroxypyrimidine/ 5-amino-6-ribitylamino-2,4(1H,3H)-pyrimidinedione
db4p[c]	3,4-dihydroxy-2-butanone 4-phosphate	C4H9O6P	C4H7O6P	-2	Cytosol	C15556
dmlz[c]	6,7-Dimethyl-8-(1-D-ribityl)lumazine	C13H18N4O6	C13H18N4O6	0	Cytosol	C04332
ribflv[c]	Riboflavin	C17H20N4O6	C17H20N4O6	0	Cytosol	C00255	Lactoflavin/ Vitamin B2/ 7,8-Dimethyl-10-ribitylisoalloxazine
fmn[c]	FMN	C17H21N4O9P	C17H19N4O9P	-2	Cytosol	C00061	Riboflavin-5-phosphate/ Flavin mononucleotide
pydx5p[c]	Pyridoxal 5'-phosphate	C8H10NO6P	C8H8NO6P	-2	Cytosol	C00018	Pyridoxal 5-phosphate/ Pyridoxal phosphate
pdx5p[c]	Pyridoxine 5'-phosphate	C8H12NO6P	C8H10NO6P	-2	Cytosol	C00627	Pyridoxine phosphate/ Pyridoxine 5-phosphate
pyam5p[c]	Pyridoxamine 5'-phosphate	C8H13N2O5P	C8H12N2O5P	-1	Cytosol	C00647	Pyridoxamine 5-phosphate/ Pyridoxamine phosphate
phthr[c]	O-Phospho-4-hydroxy-L-threonine	C4H10NO7P	C4H8NO7P	-2	Cytosol	C06055	4-(Phosphonooxy)-threonine/ 4-(Phosphonooxy)-L-threonine
4hthr[c]	4-Hydroxy-L-threonine	C4H9NO4	C4H9NO4	0	Cytosol	C06056
ohpb[c]	2-Oxo-3-hydroxy-4-phosphobutanoate	C4H7O8P	C4H4O8P	-3	Cytosol	C06054	alpha-Keto-3-hydroxy-4-phosphobutyrate
4per[c]	4-Phospho-D-erythronate	C4H9O8P	C4H6O8P	-3	Cytosol	C03393
nmn[c]	NMN	C11H15N2O8P	C11H14N2O8P	-1	Cytosol	C00455	Nicotinamide D-ribonucleotide/ Nicotinamide mononucleotide/ Nicotinamide ribonucleotide
rnmn[c]	Nicotinamide-beta-riboside	C11H15N2O5	C11H16N2O5	1	Cytosol	C03150	N-Ribosylnicotinamide; 1-(beta-D-Ribofuranosyl)nicotinamide
dnad[c]	Deamino-NAD+	C21H27N6O15P2	C21H24N6O15P2	-2	Cytosol	C00857	Deamido-NAD+
nicrnt[c]	Nicotinate D-ribonucleotide	C11H15NO9P	C11H12NO9P	-2	Cytosol	C01185	Nicotinate ribonucleotide/ Nicotinic acid ribonucleotide/ beta-Nicotinate D-ribonucleotide
quln[c]	Quinolinate	C7H5NO4	C7H3NO4	-2	Cytosol	C03722	Pyridine-2,3-dicarboxylate/ Quinolinic acid/ 2,3-Pyridinedicarboxylic acid
nicrns[c]	Nicotinate D-ribonucleoside	C11H14NO6	C11H15NO6	1	Cytosol	C05841	beta-D-Ribosylnicotinate
iasp[c]	Iminoaspartate	C4H5NO4	C4H3NO4	-2	Cytosol	C05840
2dhp[c]	2-Dehydropantoate	C6H10O4	C6H9O4	-1	Cytosol	C00966	alpha-ketopantoate
pant-R[c]	(R)-Pantoate	C6H12O4	C6H11O4	-1	Cytosol	C00522	D-pantoate/ Pantoate/ Pantoic acid
ala-B[c]	beta-Alanine	C3H7NO2	C3H7NO2	0	Cytosol	C00099	3-aminopropionic acid/ 3-Aminopropanoate
pnto-R[c]	(R)-Pantothenate	C9H17NO5	C9H16NO5	-1	Cytosol	C00864	Pantothenate/ Pantothenic acid/ D-Pantothenate
4ppan[c]	D-4'-Phosphopantothenate	C9H18NO8P	C9H15NO8P	-3	Cytosol	C03492
4ppcys[c]	N-((R)-4-Phosphopantothenoyl)-L-cysteine	C12H23N2O9PS	C12H20N2O9PS	-3	Cytosol	C04352	(R)-4'-Phosphopantothenoyl-L-cysteine
pan4p[c]	Pantetheine 4'-phosphate	C11H23N2O7PS	C11H21N2O7PS	-2	Cytosol	C01134	4'-Phosphopantetheine/ Phosphopantetheine
dpcoa[c]	Dephospho-CoA	C21H35N7O13P2S	C21H33N7O13P2S	-2	Cytosol	C00882
apoACP[c]	apoprotein [acyl carrier protein]	RHO	RHO	0	Cytosol	C03688
malcoame[c]	malonyl-CoA methyl ester	C25H40N7O19P3S	C25H36N7O19P3S	-4	Cytosol	C19673
ogmeACP[c]	3-Oxo-glutaryl-[acyl-carrier protein] methyl ester	C6H7O4R	C17H27N2O11PRS	-1	Cytosol	C20372
hgmeACP[c]	3-Hydroxyglutaryl-[acyl-carrier protein] methyl ester	C6H9O4R	C17H29N2O11PRS	-1	Cytosol	C20373
egmeACP[c]	Enoylglutaryl-[acyl-carrier protein] methyl ester	C6H7O3R	C17H27N2O10PRS	-1	Cytosol	C20374
gmeACP[c]	Glutaryl-[acyl-carrier protein] methyl ester	C6H9O3R	C17H29N2O10PRS	-1	Cytosol	C20375
opmeACP[c]	3-Oxo-pimeloyl-[acyl-carrier protein] methyl ester	C8H11O4R	C19H31N2O11PRS	-1	Cytosol	C20376
hpmeACP[c]	3-Hydroxypimeloyl-[acyl-carrier protein] methyl ester	C8H13O4R	C19H33N2O11PRS	-1	Cytosol	C20377
epmeACP[c]	Enoylpimeloyl-[acyl-carrier protein] methyl ester	C8H11O3R	C19H31N2O10PRS	-1	Cytosol	C20378
pmeACP[c]	Pimeloyl-[acyl-carrier protein] methyl ester	C8H13O3R	C19H33N2O10PRS	-1	Cytosol	C20379
meoh[c]	Methanol	CH4O1	CH4O1	0	Cytosol	C00132	Methyl alcohol
pimACP[c]	Pimeloyl-[acyl-carrier protein]	C7H10O3R	C18H31N2O10PRS	-1	Cytosol	C19845
8aonn[c]	8-Amino-7-oxononanoate	C9H17NO3	C9H17NO3	0	Cytosol	C01092	7-keto-8-aminopelargonate
amob[c]	S-Adenosyl-4-methylthio-2-oxobutanoate	C15H20N5O6S	C15H19N5O6S	0	Cytosol	C04425
dann[c]	7,8-Diaminononanoate	C9H20N2O2	C9H21N2O2	1	Cytosol	C01037
2fe1s[c]	[2Fe-1S] desulfurated iron-sulfur cluster	SFe2	SFe2	2	Cytosol
2fe2s[c]	[2Fe-2S] iron-sulfur cluster	S2Fe2	S2Fe2	2	Cytosol
btn[c]	Biotin	C10H16N2O3S	C10H15N2O3S	-1	Cytosol	C00120	Vitamin B7/ D-Biotin/ Vitamin H/ Coenzyme R
4fe4s[c]	[4Fe-4S] iron-sulfur cluster	S4Fe4	S4Fe4	2	Cytosol
octapb[c]	octanoate (protein bound)	C8H14O	C8H15O	1	Cytosol
lipopb[c]	lipoate (protein bound)	C8H13OS2	C8H12OS2	1	Cytosol
ahdt[c]	2-Amino-4-hydroxy-6-(erythro-1,2,3-trihydroxypropyl)dihydropteridine triphosphate	C9H16N5O13P3	C9H12N5O13P3	-4	Cytosol	C04895	7,8-Dihydroneopterin 3'-triphosphate/ 6-(L-erythro-1,2-Dihydroxypropyl 3-triphosphate)-7,8-dihydropterin/ 2-Amino-4-hydroxy-6-(erythro-1,2,3-trihydroxypropyl)dihydropteridine triphosphate/ 6-[(1S,2R)-1,2-Dihydroxy-3-triphosphooxypropyl]-7,8-dihydropterin/ dihydroneopterin triphosphate/ H2-neopterin triphosphate
cph4[c]	6-carboxy-5,6,7,8-tetrahydropterin	C7H9N5O3	C7H8N5O3	-1	Cytosol	C20239
dhpmp[c]	Dihydroneopterin monophosphate	C9H14N5O7P	C9H12N5O7P	-2	Cytosol	C05925
dhnpt[c]	Dihydroneopterin	C9H13N5O4	C9H13N5O4	0	Cytosol	C04874	2-Amino-4-hydroxy-6-(D-erythro-1,2,3-trihydroxypropyl)-7,8-dihydropteridine/ 7,8-dihydronepterin
6hmhpt[c]	6-hydroxymethyl dihydropterin	C7H9N5O2	C7H9N5O2	0	Cytosol	C01300	6-hydroxymethyl-7,8-dihydropterin
gcald[c]	Glycolaldehyde	C2H4O2	C2H4O2	0	Cytosol	C00266	Hydroxyacetaldehyde
6hmhptpp[c]	6-hydroxymethyl-dihydropterin pyrophosphate	C7H11N5O8P2	C7H8N5O8P2	-3	Cytosol	C04807	6-hydroxymethyl-7,8-dihydropterin pyrophosphate
4abz[c]	4-Aminobenzoate	C7H7NO2	C7H6NO2	-1	Cytosol	C00568	p-Aminobenzoate/ 4-Aminobenzoic acid/ 4-Aminobenzoate/ ABEE/ p-Aminobenzoic acid/ PABA
dhpt[c]	Dihydropteroate	C14H14N6O3	C14H13N6O3	-1	Cytosol	C00921	7,8-Dihydropteroate
4adcho[c]	4-amino-4-deoxychorismate	C10H11NO5	C10H10NO5	-1	Cytosol	C11355
pthn[c]	6-Pyruvoyltetrahydropterin	C9H11N5O3	C9H11N5O3	0	Cytosol	C03684	6-(1,2-Dioxopropyl)-5,6,7,8-tetrahydropterin; 6-Pyruvoyl-5,6,7,8-tetrahydropterin
cdg[c]	7-deaza-7-carboxyguanine	C7H6N4O3	C7H5N4O3	-1	Cytosol	C20248
preq0[c]	7-cyano-7-carbaguanine	C7H5N5O	C7H5N5O	0	Cytosol	C15996	PreQ0
preq1[c]	7-aminomethyl-7-deazaguanine	C7H9N5O	C7H10N5O	1	Cytosol	C01449	queuine/ PreQ1
fmettrna[c]	N-Formylmethionyl-tRNA	C6H9NO2SR	C6H9NO2SR	0	Cytosol	C03294
methf[c]	5,10-Methenyltetrahydrofolate	C20H22N7O6	C20H20N7O6	-1	Cytosol	C00445	5,10-methenyltetrahydrofolate/ N5,N10-methenyl-5,6,7,8-tetrahydrofolate/ N5,N10-methenyl-tetrahydrofolate/ (6R)-5,10-methenyltetrahydrofolate
5fthf[c]	5-Formyltetrahydrofolate	C20H23N7O7	C20H21N7O7	-2	Cytosol	C03479	Folinic acid; Leucovorin; L(-)-5-Formyl-5,6,7,8-tetrahydrofolic acid
trnaglu[c]	tRNA (Glu)	R	R	0	Cytosol	C01641
glutrna[c]	L-Glutamyl-tRNA(Glu)	C5H7NO3R	C5H7NO3R	0	Cytosol	C02987
glu1sa[c]	L-Glutamate 1-semialdehyde	C5H9NO3	C5H9NO3	0	Cytosol	C03741	(S)-4-Amino-5-oxopentanoate
ppbng[c]	Porphobilinogen	C10H14N2O4	C10H13N2O4	-1	Cytosol	C00931
hmbil[c]	Hydroxymethylbilane	C40H46N4O17	C40H38N4O17	-8	Cytosol	C01024
uppg3[c]	Uroporphyrinogen III	C40H44N4O16	C40H36N4O16	-8	Cytosol	C01051
cpppg3[c]	Coproporphyrinogen III	C36H44N4O8	C36H40N4O8	-4	Cytosol	C03263
pppg9[c]	Protoporphyrinogen IX	C34H40N4O4	C34H38N4O4	-2	Cytosol	C01079
ppp9[c]	Protoporphyrin	C34H34N4O4	C34H32N4O4	-2	Cytosol	C02191	Protoporphyrin IX/ Porphyrinogen IX
fe2[c]	Fe2+	Fe	Fe	2	Cytosol	C00023	Reduced Iron/ Iron dication/ Iron/ Fe(II)
pheme[c]	Protoheme	C34H32FeN4O4	C34H30FeN4O4	-2	Cytosol	C00032	Heme/ Haem/ Heme B/ hemeB
dscl[c]	dihydrosirohydrochlorin	C42H48N4O16	C42H41N4O16	-7	Cytosol	C02463	Precorrin 2
scl[c]	sirohydrochlorin	C42H46N4O16	C42H39N4O16	-7	Cytosol	C05778
sheme[c]	Siroheme	C42H46FeN4O16	C42H36FeN4O16	-8	Cytosol	C00748	Sirohaem
uppg1[c]	Uroporphyrinogen I	C40H44N4O16	C40H44N4O16	0	Cytosol	C05766
cpppg1[c]	Coproporphyrinogen I	C36H44N4O8	C36H40N4O8	-4	Cytosol	C05768
4hbz[c]	4-Hydroxybenzoate	C7H6O3	C7H5O3	-1	Cytosol	C00156	Hydroxybenzenecarboxylic acid/ Hydroxybenzoic acid/ 4-Hydroxybenzoic acid
octdp[c]	all-trans-Octaprenyl diphosphate	C40H68O7P2	C40H65O7P2	-3	Cytosol	C04146	Farnesylfarnesylgeraniol
3ophb[c]	3-Octaprenyl-4-hydroxybenzoate	C47H70O3	C47H69O3	-1	Cytosol	C05809
2oph[c]	2-Octaprenylphenol	C46H70O	C46H70O	0	Cytosol	C05810
2ohph[c]	2-Octaprenyl-6-hydroxyphenol	C46H70O2	C46H70O2	0	Cytosol	C05811
2omph[c]	2-Octaprenyl-6-methoxyphenol	C47H72O2	C47H72O2	0	Cytosol	C05812
2ombzl[c]	2-Octaprenyl-6-methoxy-1,4-benzoquinol	C47H72O3	C47H72O3	0	Cytosol
2ommbl[c]	2-Octaprenyl-3-methyl-6-methoxy- 1,4-benzoquinol	C48H74O3	C48H74O3	0	Cytosol
2omhmbl[c]	2-Octaprenyl-3-methyl-5-hydroxy-6-methoxy-1,4-benzoquinol	C48H74O4	C48H74O4	0	Cytosol
2dmmql8[c]	2-Demethylmenaquinol 8	C50H72O2	C50H72O2	0	Cytosol
mql8[c]	Menaquinol 8	C51H74O2	C51H74O2	0	Cytosol	C05819
2me4p[c]	2-C-methyl-D-erythritol 4-phosphate	C5H13O7P	C5H11O7P	-2	Cytosol	C11434
2p4c2me[c]	2-phospho-4-(cytidine 5'-diphospho)-2-C-methyl-D-erythritol	C14H26N3O17P3	C14H22N3O17P3	-4	Cytosol	C11436	2C-methyl-D-erythritol 2,4-cyclodiphosphate
2mecdp[c]	2-C-methyl-D-erythritol 2,4-cyclodiphosphate	C5H12O9P2	C5H10O9P2	-2	Cytosol	C11453
h2mb4p[c]	1-hydroxy-2-methyl-2-(E)-butenyl 4-diphosphate	C5H12O8P2	C5H9O8P2	-3	Cytosol	C11811
dmpp[c]	Dimethylallyl diphosphate	C5H12O7P2	C5H9O7P2	-3	Cytosol	C00235	2-Isopentenyl diphosphate/ delta2-Isopentenyl diphosphate/ Prenyl diphosphate/ dimethylallyl pyrophosphate
ipdp[c]	Isopentenyl diphosphate	C5H12O7P2	C5H9O7P2	-3	Cytosol	C00129	delta3-Isopentenyl diphosphate/ delta3-methyl-3-butenyl diphosphate/ Isopentenyl pyrophosphate/ Isoprenyl pyrophosphate
grdp[c]	Geranyl diphosphate	C10H20O7P2	C10H17O7P2	-3	Cytosol	C00341	GPP
frdp[c]	Farnesyl diphosphate	C15H28O7P2	C15H25O7P2	-3	Cytosol	C00448	Farnesyl pyrophosphate/ 2-trans,6-trans-Farnesyl diphosphate/ trans,trans-Farnesyl diphosphate/ FPP
dtdpglu[c]	dTDPglucose	C16H26N2O16P2	C16H24N2O16P2	-2	Cytosol	C00842	dTDP-D-glucose
dttp[c]	dTTP	C10H17N2O14P3	C10H13N2O14P3	-4	Cytosol	C00459	Thymidine triphosphate/ Thymidine 5'-triphosphate/ TTP
dtdp4d6dg[c]	dTDP-4-dehydro-6-deoxy-D-glucose	C16H24N2O15P2	C16H22N2O15P2	-2	Cytosol	C00687	dTDP-4-oxo-6-deoxy-D-glucose
dtdp4d6dm[c]	dTDP-4-dehydro-6-deoxy-L-mannose	C16H24N2O15P2	C16H22N2O15P2	-2	Cytosol	C00688	dTDP-4-oxo-L-rhamnose/ dTDP-4-oxo-6-deoxy-L-mannose
dtdprmn[c]	dTDP-L-rhamnose	C16H26N2O15P2	C16H24N2O15P2	-2	Cytosol	C03319	dTDP-6-deoxy-L-mannose/ dTDP-L-rhamnose
adpglc[c]	ADPglucose	C16H25N5O15P2	C16H23N5O15P2	-2	Cytosol	C00498	Adenosine diphosphoglucose
glycogen[c]	glycogen	C6H10O5	C6H10O5	0	Cytosol	C00182
ddca[c]	Dodecanoate (n-C12:0)	C12H24O2	C12H23O2	-1	Cytosol	C02679	Dodecylcarboxylate/ Lauric acid/ Dodecanoic acid
ttdca[c]	tetradecanoate (n-C14:0)	C14H28O2	C14H27O2	-1	Cytosol	C06424	Tetradecanoate/ neo-fat 14/ univol u 3165/ emery 655/ hydrofol acid 1495/ Myristic Acid/ n-tetradecoic acid/ 1-tridecanecarboxylic acid/ crodacid/ Myristate/ hystrene 9014/ n-Tetradecanoic Acid
cddec5eACP[c]	cis-dodec-5-enoyl-[acyl-carrier protein] (n-C12:1)	C23H42N2O8PRS	C23H41N2O8PRS	-1	Cytosol
3hcmrs7eACP[c]	(R)-3-hydroxy-cis-myristol-7-eoyl-[acyl-carrier protein]	C25H46N2O9PRS	C25H45N2O9PRS	-1	Cytosol
3ocmrs7eACP[c]	3-oxo-cis-myristol-7-eoyl-[acyl-carrier protein]	C25H44N2O9PRS	C25H43N2O9PRS	-1	Cytosol
t3c7mrseACP[c]	trans-3-cis-7-myristoleoyl-[acyl-carrier protein]	C25H44N2O8PRS	C25H43N2O8PRS	-1	Cytosol
tdeACP[c]	cis-tetradec-7-enoyl-[acyl-carrier protein] (n-C14:1)	C25H46N2O8PRS	C25H45N2O8PRS	-1	Cytosol		cis-myristol-7-eoyl-[acyl-carrier protein] (n-C14:1)/ Tetradecenoyl-ACP (n-C14:1ACP)
ttdcea[c]	tetradecenoate (n-C14:1)	C14H26O2	C14H25O2	-1	Cytosol	C08322	tetradecenoic acid; Myristoleic acid
hdca[c]	Hexadecanoate (n-C16:0)	C16H32O2	C16H31O2	-1	Cytosol	C00249	palmitate/ Palmitic acid/ Hexadecylic acid/ Cetylic acid/ Hexadecanoic acid
3ocpalm9eACP[c]	3-oxo-cis-palm-9-eoyl-[acyl-carrier protein]	C27H48N2O9PRS	C27H47N2O9PRS	-1	Cytosol
3hcpalm9eACP[c]	(R)-3-hydroxy-cis-palm-9-eoyl-[acyl-carrier protein]	C27H50N2O9PRS	C27H49N2O9PRS	-1	Cytosol
t3c9palmeACP[c]	trans-3-cis-9-palmitoleoyl-[acyl-carrier protein]	C27H48N2O8PRS	C27H47N2O8PRS	-1	Cytosol
hdeACP[c]	cis-hexadec-9-enoyl-[acyl-carrier protein] (n-C16:1)	C27H50N2O8PRS	C27H49N2O8PRS	-1	Cytosol		cis-palmitol-9-eoyl-[acyl-carrier protein] (n-C16:1)/ Hexadecenoyl-ACP (n-C16:1ACP)
hdcea[c]	Hexadecenoate (n-C16:1)	C16H30O2	C16H29O2	-1	Cytosol	C08362	cis-9-Hexadecenoic acid/ Palmitoleic acid/ hexadecenoic acid/ (9Z)-Hexadecenoic acid
ocdca[c]	octadecanoate (n-C18:0)	C18H36O2	C18H35O2	-1	Cytosol	C01530	Stearate/ Stearic acid/ Octadecanoic acid
3ocvac11eACP[c]	3-oxo-cis-vacc-11-enoyl-[acyl-carrier protein]	C29H52N2O9PRS	C29H51N2O9PRS	-1	Cytosol
3hcvac11eACP[c]	(R)-3-hydroxy-cis-vacc-11-enoyl-[acyl-carrier protein]	C29H54N2O9PRS	C29H53N2O9PRS	-1	Cytosol
t3c11vaceACP[c]	trans-3-cis-11-vacceoyl-[acyl-carrier protein]	C29H52N2O8PRS	C29H51N2O8PRS	-1	Cytosol
octeACP[c]	cis-octadec-11-enoyl-[acyl-carrier protein] (n-C18:1)	C29H54N2O8PRS	C29H53N2O8PRS	-1	Cytosol		cis-vacc-11-enoyl-[acyl-carrier protein] (n-C18:1)/ Octadecenoyl-ACP (n-C18:1ACP)
ocdcea[c]	octadecenoate (n-C18:1)	C18H34O2	C18H33O2	-1	Cytosol	C00712	Oleic acid/ octadecenoic acid/ oleate/ (9Z)-Octadecenoic acid/ (Z)-Octadec-9-enoic acid/ Vaccenic acid
ade[c]	Adenine	C5H5N5	C5H5N5	0	Cytosol	C00147	A/ Ade/ 1H-Purin-6-amine/ Adeninimine/ Vitamin B4/ 6-Aminopurine
sql[c]	Squalene	C30H50	C30H50	0	Cytosol	C00751	Spinacene/Supraene
hopen[c]	22(29)-Hopene	C30H50	C30H50	0	Cytosol	C06310	Diploptene/Hop-22(29)-ene
hopanol[c]	22-Hopanol	C30H52O	C30H52O	0	Cytosol	C06309	Diplopterol/Hopan-22-ol
thbh[c]	Tetrahydroxybacteriohopanetetrol	C35H62O4	C35H62O4	0	Cytosol		bacteriohopane-32,33,34,35-tetrol
thbhet[c]	Tetrahydroxybacteriohopane-ether	C41H73NO8	C41H73NO8	0	Cytosol		bacteriohopane-,32,33,34-triol-35-cyclitol
thbhga[c]	Tetrahydroxybacteriohopane-glucosamine	C41H73NO8	C41H73NO8	0	Cytosol		bacteriohopanetetrol cyclitol
1agpe120[c]	1-Acyl-sn-glycero-3-phosphoethanolamine (n-C12:0)	C17H36NO7P1	C17H36NO7P1	0	Periplasm	C04438	L-2-Lysophosphatidylethanolamine/ 1-Acyl-sn-glycero-3-phosphoethanolamine
1agpe140[c]	1-Acyl-sn-glycero-3-phosphoethanolamine (n-C14:0)	C19H40NO7P1	C19H40NO7P1	0	Periplasm	C04438	1-Acyl-sn-glycero-3-phosphoethanolamine/ L-2-Lysophosphatidylethanolamine
1agpe141[c]	1-Acyl-sn-glycero-3-phosphoethanolamine (n-C14:1)	C19H38NO7P1	C19H38NO7P1	0	Periplasm	C04438	1-Acyl-sn-glycero-3-phosphoethanolamine/ L-2-Lysophosphatidylethanolamine
1agpe160[c]	1-Acyl-sn-glycero-3-phosphoethanolamine (n-C16:0)	C21H44NO7P1	C21H44NO7P1	0	Periplasm	C04438	1-Acyl-sn-glycero-3-phosphoethanolamine/ L-2-Lysophosphatidylethanolamine
1agpe161[c]	1-Acyl-sn-glycero-3-phosphoethanolamine (n-C16:1)	C21H42NO7P1	C21H42NO7P1	0	Periplasm	C04438	1-Acyl-sn-glycero-3-phosphoethanolamine/ L-2-Lysophosphatidylethanolamine
1agpe180[c]	1-Acyl-sn-glycero-3-phosphoethanolamine (n-C18:0)	C23H48NO7P1	C23H48NO7P1	0	Periplasm	C04438	1-Acyl-sn-glycero-3-phosphoethanolamine/ L-2-Lysophosphatidylethanolamine
1agpe181[c]	1-Acyl-sn-glycero-3-phosphoethanolamine (n-C18:1)	C23H46NO7P1	C23H46NO7P1	0	Periplasm	C04438	1-Acyl-sn-glycero-3-phosphoethanolamine/ L-2-Lysophosphatidylethanolamine
ametam[c]	S-Adenosylmethioninamine	C14H22N6O3S	C14H24N6O3S	2	Cytosol	C01137	S-Adenosyl-L-methioninamine/ (5-Deoxy-5-adenosyl)(3-aminopropyl)methylsulfonium salt
5mta[c]	5-Methylthioadenosine	C11H15N5O3S	C11H15N5O3S	0	Cytosol	C00170	5'-S-Methylthioadenosine/ 5'-Methylthioadenosine/ Methylthioadenosine/ 5'-Deoxy-5'-(methylthio)adenosine
fad[c]	Flavin adenine dinucleotide oxidized	C27H33N9O15P2	C27H31N9O15P2	-2	Cytosol	C00016	FAD/ Flavin adenine dinucleotide/ Riboflavine 5'-adenosine diphosphate
ahopan[c]	adenosyl hopane	C40H63N5O3	C40H63N5O3	0	Cytosol
rhopan[c]	ribosyl hopane	C35H60O4	C35H60O4	0	Cytosol		(5-D-ribonyl)hopane
fhopan[c]	formyl hopane	C35H60O4	C35H60O4	0	Cytosol
ugam[c]	UDP-D-glucosamine	C15H25N3O16P2	C15H23N3O16P2	-2	Cytosol
ara5p[c]	D-Arabinose 5-phosphate	C5H11O8P	C5H9O8P	-2	Cytosol	C01112
kdo8p[c]	3-Deoxy-D-manno-octulosonate 8-phosphate	C8H15O11P	C8H12O11P	-3	Cytosol	C04478	2-Dehydro-3-deoxy-D-octonate 8-phosphate
kdo[c]	3-Deoxy-D-manno-2-octulosonate	C8H14O8	C8H13O8	-1	Cytosol	C01187	3-Deoxy-D-manno-octulosonate/ KDO/ 2-Dehydro-3-deoxy-D-octonate/ 3-Deoxyoctulosonic acid
ckdo[c]	CMP-3-deoxy-D-manno-octulosonate	C17H26N3O15P	C17H24N3O15P	-2	Cytosol	C04121	CMP-KDO
2dhguln[c]	2-Dehydro-L-gulonate	C6H10O7	C6H9O7	-1	Cytosol	C06473
trnaala[c]	tRNA(Ala)	R	R	0	Cytosol	C01635
alatrna[c]	L-Alanyl-tRNA(Ala)	C3H5NOR	C3H6NOR	1	Cytosol	C00886	L-Alanyl-tRNA
trnaarg[c]	tRNA(Arg)	R	R	0	Cytosol	C01636
argtrna[c]	L-Arginyl-tRNA(Arg)	C6H12N4OR	C6H14N4OR	2	Cytosol	C02163	L-Arginyl-tRNA
asntrna[c]	L-Asparaginyl-tRNA(Asn)	C14H23N2O12PR2	C14H24N2O12PR2	1	Cytosol	C03402
trnaasp[c]	tRNA(Asp)	R	R	0	Cytosol	C01638
asptrna[c]	L-Aspartyl-tRNA(Asp)	C4H5NO3R	C4H5NO3R	0	Cytosol	C02984
trnaasn[c]	tRNA(Asn)	C10H17O10PR2	C10H17O10PR2	0	Cytosol	C01637
trnacys[c]	tRNA(Cys)	R	R	0	Cytosol	C01639
cystrna[c]	L-Cysteinyl-tRNA(Cys)	C3H5NOSR	C3H6NOSR	1	Cytosol	C03125
trnagln[c]	tRNA(Gln)	R	R	0	Cytosol	C01640
glntrna[c]	L-Glutaminyl-tRNA(Gln)	C5H8N2O2R	C5H9N2O2R	1	Cytosol	C02282	Glutaminyl-tRNA
glytrna[c]	Glycyl-tRNA(Gly)	C2H3NOR	C2H4NOR	1	Cytosol	C02412
trnagly[c]	tRNA(Gly)	R	R	0	Cytosol	C01642
trnahis[c]	tRNA(His)	R	R	0	Cytosol	C01643
histrna[c]	L-Histidyl-tRNA(His)	C6H7N3OR	C6H8N3OR	1	Cytosol	C02988
trnaile[c]	tRNA(Ile)	R	R	0	Cytosol	C01644
iletrna[c]	L-Isoleucyl-tRNA(Ile)	C6H11NOR	C6H12NOR	1	Cytosol	C03127
trnaleu[c]	tRNA(Leu)	R	R	0	Cytosol	C01645
leutrna[c]	L-Leucyl-tRNA(Leu)	C6H11NOR	C6H12NOR	1	Cytosol	C02047	L-Leucyl-tRNA
trnalys[c]	tRNA(Lys)	R	R	0	Cytosol	C01646
lystrna[c]	L-Lysine-tRNA (Lys)	C6H12N2OR	C6H14N2OR	2	Cytosol	C01931	L-Lysyl-tRNA
phetrna[c]	L-Phenylalanyl-tRNA(Phe)	C9H9NOR	C9H10NOR	1	Cytosol	C03511
trnaphe[c]	tRNA(Phe)	R	R	0	Cytosol	C01648
trnapro[c]	tRNA(Pro)	R	R	0	Cytosol	C01649
protrna[c]	L-Prolyl-tRNA(Pro)	C5H9NOR	C5H8NOR	1	Cytosol	C02702
trnasecys[c]	tRNA(SeCys)	R	R	0	Cytosol
trnaser[c]	tRNA(Ser)	R	R	0	Cytosol	C01650
sertrna[c]	L-Seryl-tRNA(Ser)	C3H5NO2R	C3H6NO2R	1	Cytosol	C02553
sertrna[sec][c]	L-Seryl-tRNA(Sec)	C3H5NO2R	C3H6NO2R	1	Cytosol	C06481
trnathr[c]	tRNA(Thr)	R	R	0	Cytosol	C01651
thrtrna[c]	L-Threonyl-tRNA(Thr)	C4H7NO2R	C4H8NO2R	1	Cytosol	C02992
trnatrp[c]	tRNA(Trp)	R	R	0	Cytosol	C01652
trptrna[c]	L-Tryptophanyl-tRNA(Trp)	C11H10N2OR	C11H11N2OR	1	Cytosol	C03512
trnatyr[c]	tRNA(Tyr)	R	R	0	Cytosol	C00787
tyrtrna[c]	L-Tyrosyl-tRNA(Tyr)	C9H9NO2R	C9H10NO2R	1	Cytosol	C02839
trnaval[c]	tRNA(Val)	R	R	0	Cytosol	C01653
sbt[c]	D-Sorbitol	C6H14O6	C6H14O6	0	Cytosol	C00794	D-Glucitol/L-Gulitol/Sorbitol
fadh2[c]	Flavin adenine dinucleotide reduced	C27H35N9O15P2	C27H33N9O15P2	-2	Cytosol	C01352	flavin adenine dinucleotide (reduced form)
glyc[c]	Glycerol	C3H8O3	C3H8O3	0	Cytosol	C00116	1,2,3-trihydroxypropane/ 3-propanetriol/ Glycerin
k[c]	potassium	K	K	1	Cytosol	C00238	Potassium/ K+
dha[c]	Dihydroxyacetone	C3H6O3	C3H6O3	0	Cytosol	C00184	Glycerone/ 1/ 3-Dihydroxyacetone/ 3-Dihydroxy-2-propanone/ 3-Dihydroxypropan-2-one
mg2[c]	magnesium	Mg	Mg	2	Cytosol	C00305	Mg
ncam[c]	Nicotinamide	C6H6N2O	C6H6N2O	0	Cytosol	C00153	Nicotinic acid amide/ Niacinamide/ Vitamin PP
nac[c]	Nicotinate	C6H5NO2	C6H4NO2	-1	Cytosol	C00253	Niacin/ Nicotinic acid/ 3-Pyridinecarboxylic acid
g3pg[c]	Glycerophosphoglycerol	C6H15O8P	C6H14O8P	-1	Cytosol	C03274
fald[c]	Formaldehyde	CH2O	CH2O	0	Cytosol	C00067
cdec3eACP[c]	cis-dec-3-enoyl-[acyl-carrier protein] (n-C10:1)	C21H38N2O8PRS	C21H37N2O8PRS	-1	Cytosol
3ocddec5eACP[c]	3-oxo-cis-dodec-5-enoyl-[acyl-carrier protein]	C23H40N2O9PRS	C23H39N2O9PRS	-1	Cytosol
3hcddec5eACP[c]	(R)-3-hydroxy-cis-dodec-5-enoyl-[acyl-carrier protein]	C23H42N2O9PRS	C23H41N2O9PRS	-1	Cytosol
t3c5ddeceACP[c]	trans-3-cis-5-dodecenoyl-[acyl-carrier protein]	C23H40N2O8PRS	C23H39N2O8PRS	-1	Cytosol
cddec5eACP[c]	cis-dodec-5-enoyl-[acyl-carrier protein] (n-C12:1)	C23H42N2O8PRS	C23H41N2O8PRS	-1	Cytosol
h[c]	H+	H	H	1	Cytosol	C00080	Proton/ Hydrogen Ion
hexACP[c]	Hexanoyl-ACP (n-C6:0ACP)	C17H32N2O8PRS	C17H31N2O8PRS	-1	Cytosol	C05749	Hexanoyl-[acp]/ Hexanoyl-[acyl-carrier protein]
palmACP[c]	Palmitoyl-ACP (n-C16:0ACP)	C27H52N2O8PRS	C27H51N2O8PRS	-1	Cytosol	C05764	Hexadecanoyl-[acp]/ Hexadecanoyl-[acyl-carrier protein]/ hexadecanoyl-ACP/ fa8-ACP
pgp120[c]	Phosphatidylglycerophosphate (didodecanoyl, n-C12:0)	C30H60O13P2	C30H57O13P2	-3	Cytosol	C03892	3(3-sn-Phosphatidyl)-sn-glycerol 1-phosphate/ 3(3-Phosphatidyl-)L-glycerol 1-phosphate/ 1,2-Diacyl-sn-glycero-3-phospho-sn-glycerol 3'-phosphate
pgp140[c]	Phosphatidylglycerophosphate (ditetradecanoyl, n-C14:0)	C34H68O13P2	C34H65O13P2	-3	Cytosol	C03892	3(3-sn-Phosphatidyl)-sn-glycerol 1-phosphate/ 3(3-Phosphatidyl-)L-glycerol 1-phosphate/ 1,2-Diacyl-sn-glycero-3-phospho-sn-glycerol 3'-phosphate
pgp141[c]	Phosphatidylglycerophosphate (ditetradec-7-enoyl, n-C14:1)	C34H64O13P2	C34H61O13P2	-3	Cytosol	C03892	3(3-sn-Phosphatidyl)-sn-glycerol 1-phosphate/ 3(3-Phosphatidyl-)L-glycerol 1-phosphate/ 1,2-Diacyl-sn-glycero-3-phospho-sn-glycerol 3'-phosphate
pgp160[c]	Phosphatidylglycerophosphate (dihexadecanoyl, n-C16:0)	C38H76O13P2	C38H73O13P2	-3	Cytosol	C03892	3(3-sn-Phosphatidyl)-sn-glycerol 1-phosphate/ 3(3-Phosphatidyl-)L-glycerol 1-phosphate/ 1,2-Diacyl-sn-glycero-3-phospho-sn-glycerol 3'-phosphate
pgp161[c]	Phosphatidylglycerophosphate (dihexadec-9-enoyl, n-C16:1)	C38H72O13P2	C38H69O13P2	-3	Cytosol	C03892	3(3-sn-Phosphatidyl)-sn-glycerol 1-phosphate/ 3(3-Phosphatidyl-)L-glycerol 1-phosphate/ 1,2-Diacyl-sn-glycero-3-phospho-sn-glycerol 3'-phosphate
pgp180[c]	Phosphatidylglycerophosphate (dioctadecanoyl, n-C18:0)	C42H84O13P2	C42H81O13P2	-3	Cytosol	C03892	3(3-sn-Phosphatidyl)-sn-glycerol 1-phosphate/ 3(3-Phosphatidyl-)L-glycerol 1-phosphate/ 1,2-Diacyl-sn-glycero-3-phospho-sn-glycerol 3'-phosphate
pgp181[c]	Phosphatidylglycerophosphate (dioctadec-11-enoyl, n-C18:1)	C42H80O13P2	C42H77O13P2	-3	Cytosol	C03892	3(3-sn-Phosphatidyl)-sn-glycerol 1-phosphate/ 3(3-Phosphatidyl-)L-glycerol 1-phosphate/ 1,2-Diacyl-sn-glycero-3-phospho-sn-glycerol 3'-phosphate
asp-D[c]	D-Aspartate	C4H7NO4	C4H6NO4	-1	Cytosol	C00402	D-Aspartic acid
acser[c]	O-Acetyl-L-serine	C5H9NO4	C5H9NO4	0	Cytosol	C00979	O3-Acetyl-L-serine
cys-L[c]	L-Cysteine	C3H7NO2S	C3H7NO2S	0	Cytosol	C00097	Cys/ L-2-Amino-3-mercaptopropionic acid
spmd[c]	Spermidine	C7H19N3	C7H22N3	3	Cytosol	C00315	N-(3-Aminopropyl)-1,4-butane-diamine
murein5p5p[c]	two linked disacharide pentapeptide murein units (uncrosslinked, middle of chain)	C80H128N16O42	C80H124N16O42	-4	Cytosol		GlcNac-MurNac-pentapeptide (x2)/ [GlcNac-MurNac-pentapeptide(beta1->4)GlcNac-MurNac-pentapeptide] unit
murein5p5p5p[c]	three linked disacharide pentapeptide murein units (uncrosslinked, middle of chain)	C120H192N24O63	C120H186N24O63	-6	Cytosol		GlcNac-MurNac-pentapeptide (x3)/ [GlcNac-MurNac-pentapeptide(beta1->4)GlcNac-MurNac-pentapeptide(beta1->4)GlcNac-MurNac-pentapeptide] unit
thmpp[c]	Thiamine diphosphate	C12H19N4O7P2S	C12H16N4O7P2S	-2	Cytosol	C00068	cocarboxylase/ Thiamin diphosphate/ TPP/ ThPP/ Thiamin pyrophosphate
dtbt[c]	Dethiobiotin	C10H18N2O3	C10H17N2O3	-1	Cytosol	C01909	Desthiobiotin
na1[c]	Sodium	Na	Na	1	Cytosol	C01330	Natrium/ Na
4c2me[c]	4-(cytidine 5'-diphospho)-2-C-methyl-D-erythritol	C14H25N3O14P2	C14H23N3O14P2	-2	Cytosol	C11435
gllc[e]	Gluconolactone	C6H10O6	C6H10O6	0	Extra-organism	C00198
h2[e]	H2	H2	H2	0	Extra-organism	C00282
lev1[e]	Levan	C12H22O11	C12H22O11	0	Extra-organism	C06215	(2,6-beta-D-Fructosyl)n; Levan n; 2,6-beta-D-Fructan
lev2[e]	Levan	C18H32O16	C18H32O16	0	Extra-organism	C06215	(2,6-beta-D-Fructosyl)n+1
ac[e]	Acetate	C2H4O2	C2H3O2	-1	Extra-organism	C00033	vinegar/ Ethylic acid/ Vinegar acid/ Methanecarboxylic acid/ Acetic acid/ Ethanoic acid
acald[e]	Acetaldehyde	C2H4O	C2H4O	0	Extra-organism	C00084	Aldehyde C(2)/ acetylaldehyde/ Aceteldehyde/ Acetic aldehyde/ Ethyl aldehyde/ Aldehyde/ Ethanal
co2[e]	CO2	CO2	CO2	0	Extra-organism	C00011	Carbon dioxide/ Carbonic anhydride
etoh[e]	Ethanol	C2H6O	C2H6O	0	Extra-organism	C00469	Ethyl alcohol/ Methylcarbinol
for[e]	Formate	CH2O2	CH1O2	-1	Extra-organism	C00058	Hydrogencarboxylic acid/ aminic acid/ Methanoic acid/ Formic acid
fum[e]	Fumarate	C4H4O4	C4H2O4	-2	Extra-organism	C00122	boletic acid/ allomaleic acid/ Fumaric acid/ Trans-butenedioic acid
glyc[e]	Glycerol	C3H8O3	C3H8O3	0	Extra-organism	C00116	1,2,3-trihydroxypropane/ 3-propanetriol/ Glycerin
k[e]	potassium	K	K	1	Extra-organism	C00238	Potassium/ K+
lac-D[e]	D-Lactate	C3H6O3	C3H5O3	-1	Extra-organism	C00256	(R)-Lactate/ D-Lactic acid/ D-2-Hydroxypropanoic acid/ D-2-Hydroxypropionic acid
na1[e]	Sodium	Na	Na	1	Extra-organism	C01330	Natrium/ Na
nh4[e]	Ammonium	H3N	H4N	1	Extra-organism	C01342	NH3
o2[e]	O2	O2	O2	0	Extra-organism	C00007	Oxygen/ dioxygen
pi[e]	Phosphate	H3O4P	HO4P	-2	Extra-organism	C00009	Orthophosphate/ Pi/ Phosphoric acid
pnto-R[e]	(R)-Pantothenate	C9H17NO5	C9H16NO5	-1	Extra-organism	C00864	Pantothenate/ Pantothenic acid/ D-Pantothenate
so4[e]	Sulfate	H2O4S	O4S	-2	Extra-organism	C00059	Sulfuric acid
succ[e]	Succinate	C4H6O4	C4H4O4	-2	Extra-organism	C00042	Succinic acid/ Butanedionic acid/ Ethylenesuccinic acid
cu2[e]	Cu2+	Cu	Cu	2	Extra-organism	C00070	Copper
mnl[e]	D-Mannitol	C6H14O6	C6H14O6	0	Extra-organism	C00392
dha[e]	Dihydroxyacetone	C3H6O3	C3H6O3	0	Extra-organism	C00184	Glycerone/ 1/ 3-Dihydroxyacetone/ 3-Dihydroxy-2-propanone/ 3-Dihydroxypropan-2-one
actin[e]	(S)-Acetoin	C4H8O2	C4H8O2	0	Extra-organism	C01769
mg2[e]	magnesium	Mg	Mg	2	Extra-organism	C00305	Mg
fe2[e]	Fe2+	Fe	Fe	2	Extra-organism	C00023	Reduced Iron/ Iron dication/ Iron/ Fe(II)
5mtr[e]	5-Methylthio-D-ribose	C6H12O4S	C6H12O4S	0	Extra-organism	C03089	S5-Methyl-5-thio-D-ribose
sucr[e]	Sucrose	C12H22O11	C12H22O11	0	Extra-organism	C00089	Cane sugar/ Saccharose/ Sugar/ 1-alpha-D-glucopyranosyl-2-beta-D-fructofuranoside
h2o[e]	H2O	H2O	H2O	0	Extra-organism	C00001	Water/ Dihydrogen oxide
fru[e]	D-Fructose	C6H12O6	C6H12O6	0	Extra-organism	C00095	Levulose/ Fruit sugar/ D-Arabino-hexulose
glc-D[e]	D-Glucose	C6H12O6	C6H12O6	0	Extra-organism	C00031	alpha-D-Glucose/ beta-D-Glucose/ Grape sugar/ Dextrose/ Glucose
sbt[e]	D-Sorbitol	C6H14O6	C6H14O6	0	Extra-organism	C00794
glcn[e]	D-Gluconate	C6H12O7	C6H11O7	-1	Extra-organism	C00257	D-Gluconic acid/ D-Gluco-hexonic acid/ Dextronic Acid
h[e]	H+	H	H	1	Extra-organism	C00080	Proton/ Hydrogen Ion
cu2[c]	Cu2+	Cu	Cu	2	Cytosol	C00070	Copper
glyc3p[e]	Glycerol 3-phosphate	C3H9O6P	C3H7O6P	-2	Extra-organism	C00093	Glycerophosphoric acid/ sn-Gro-1-P/ Phosphatidyl glycerol/ sn-Glycerol 3-phosphate
h2[c]	H2	H2	H2	0	Cytosol	C00282	Hydrogen
mal-L[e]	L-Malate	C4H6O5	C4H4O5	-2	Extra-organism	C00149	(S)-Malate/ L-Apple acid/ L-Malic acid/ L-2-Hydroxybutanedioic acid/ Malate
5mtr[c]	5-Methylthio-D-ribose	C6H12O4S	C6H12O4S	0	Cytosol	C03089	S5-Methyl-5-thio-D-ribose
man[c]	D-Mannose	C6H12O6	C6H12O6	0	Cytosol	C00159	Mannose/ Seminose/ Carubinose
van[c]	Vanillate	C8H8O4	C8H8O4	0	Cytosol	C06672	Vanillic acid/4-Hydroxy-3-methoxybenzoate/4-Hydroxy-3-methoxybenzoic acid
34dhb[c]	3,4-Dihydroxybenzoate	C7H6O4	C7H6O4	0	Cytosol	C00230	3,4-Dihydroxybenzoic acid/Protocatechuate/Protocatechuic acid
no2[c]	Nitrite	HNO2	NO2	-1	Cytosol	C00088	Nitric acid
no3[c]	Nitrate	HNO3	NO3	-1	Cytosol	C00244	Nitric acid
no3[e]	Nitrate	HNO3	NO3	-1	Extra-organism	C00244	Nitric acid
mqn8[c]	Menaquinone 8	C51H72O2	C51H72O2	0	Cytosol	C00828	Vitamin K2
2h3oppan[c]	2-Hydroxy-3-oxopropanoate	C3H4O4	C3H3O4	-1	Cytosol	C01146	Tartronate semialdehyde

## Sheet: Complex and Minimal Media
	Minimal Medium		Complex Medium
Rxn name	LB	UB	LB	UB
EX_biomass	0	1000	0	1000
EX_ac(e)	0	1000	0	1000
EX_acald(e)	0	1000	0	1000
EX_co2(e)	0	1000	0	1000
EX_etoh(e)	0	1000	0	1000
EX_for(e)	0	1000	0	1000
EX_fru(e)	0	1000	0	1000
EX_fum(e)	0	1000	0	1000
EX_glc(e)	-1000	1000	-1000	1000
EX_glyc(e)	0	1000	0	1000
EX_h(e)	-1000	1000	-1000	1000
EX_h2(e)	-1000	1000	-1000	1000
EX_h2o(e)	-1000	1000	-1000	1000
EX_k(e)	-1000	1000	-1000	1000
EX_lac-D(e)	0	0	0	0
EX_mal-L(e)	0	1000	-0.1	1000
EX_na1(e)	-1000	1000	-1000	1000
EX_nh4(e)	-1000	1000	-1000	1000
EX_o2(e)	0	1000	0	1000
EX_pi(e)	-1000	1000	-1000	1000
EX_pnto-R(e)	0	1000	0	1000
EX_sbt(e)	0	1000	0	1000
EX_so4(e)	-1000	1000	-1000	1000
EX_succ(e)	0	1000	0	1000
EX_cu2(e)	-1000	1000	-1000	1000
EX_mnl(e)	0	1000	0	1000
EX_sucr(e)	0	1000	0	1000
EX_dha(e)	0	1000	0	1000
EX_actin(e)	0	1000	0	1000
EX_mg2(e)	-1000	1000	-1000	1000
EX_fe2(e)	-1000	1000	-1000	1000
EX_glcn(e)	0	1000	0	1000
EX_no3(e)	0	1000	0	1000
EX_lev2(e)	0	1000	0	1000
EX_5mtr(e)	0	1000	0	1000
EX_adn(e)	0	1000	-0.1	1000
EX_ala-L(e)	0	1000	-0.1	1000
EX_arg-L(e)	0	1000	-0.1	1000
EX_gln-L(e)	0	1000	-0.1	1000
EX_glu-L(e)	0	1000	-0.1	1000
EX_gly(e)	0	1000	-0.1	1000
EX_gua(e)	0	1000	-0.1	1000
EX_his-L(e)	0	1000	-0.1	1000
EX_ile-L(e)	0	1000	-0.1	1000
EX_ins(e)	0	1000	-0.1	1000
EX_leu-L(e)	0	1000	-0.1	1000
EX_lys-L(e)	0	1000	-0.1	1000
EX_met-L(e)	0	1000	-0.1	1000
EX_nac(e)	0	1000	-0.1	1000
EX_phe-L(e)	0	1000	-0.1	1000
EX_pro-L(e)	0	1000	-0.1	1000
EX_ribflv(e	0	1000	-0.1	1000
EX_ser-L(e)	0	1000	-0.1	1000
EX_thr-L(e)	0	1000	-0.1	1000
EX_thym(e)	0	1000	-0.1	1000
EX_thymd(e)	0	1000	-0.1	1000
EX_trp-L(e)	0	1000	-0.1	1000
EX_tyr-L(e)	0	1000	-0.1	1000
EX_uri(e)	0	1000	-0.1	1000
EX_val-L(e)	0	1000	-0.1	1000
EX_asn-L(e)	0	1000	-0.1	1000
EX_asp-L(e)	0	1000	-0.1	1000
EX_chor(e)	0	1000	-0.1	1000
EX_cytd(e)	0	1000	-0.1	1000
EX_dad-2(e)	0	1000	-0.1	1000
EX_dcyt(e)	0	1000	-0.1	1000
EX_pyr(e)	0	1000	0	1000
